# Supplementary material for: Auditory sensitivity to spectral modulation phase reversal as a function of modulation depth
Source: PLoS One. 2018 Apr 5;13(4):e0195686. doi: 10.1371/journal.pone.0195686 (PMC5886689; doi:10.1371/journal.pone.0195686)
Supplement: S1 Table — Listener thresholds by experiment. (XLSX) [file pone.0195686.s001.xlsx]

## Sheet: Exp1
	L1											L2											L3
		0.25 rpo
	adaptive threshold >>	3.82											5.38											4.09
		5.4023	100	100	90	100	80	94					7.60847	80	80	80	100	90	86					5.78413	60	50	70	70	90	68
		3.82	80	90	80	100	90	88					5.38	90	90	70	50	70	74					4.09	50	60	60	70	60	60
		2.70115	70	70	80	50	100	74					3.80423	100	60	80	80	80	80					2.89207	70	40	50	50	40	50
		1.91	50	90	40	40	50	54					2.69	30	30	60	60	30	42					2.045	60	50	40	60	60	54
		1.35057	30	30	40	50	40	38					1.90212	60	60	50	30	50	50					1.44603	90	70	40	50	50	60
		0.955	20	50	40	40	40	38					1.345	30	20	0	70	30	30					1.0225	20	40	30	20	30	28
		0.5 rpo
		3.06											3.97											3.41
		4.32749	100	90	100	90	90	94					5.61443	70	100	80	90	80	84					4.82247	90	90	70	70	80	80
		3.06	90	60	70	70	100	78					3.97	80	70	100	90	70	82					3.41	60	60	70	70	60	64
		2.16375	60	50	70	50	80	62					2.80721	70	80	60	30	80	64					2.41123	50	70	50	40	70	56
		1.53	60	40	60	40	60	52					1.985	40	70	50	50	60	54					1.705	30	30	20	60	40	36
		1.08187	70	30	70	60	10	48					1.40361	70	50	70	40	50	56					1.20562	20	30	20	30	40	28
		0.765	60	20	30	20	30	32					0.9925	20	30	10	20	30	22					0.8525	30	40	50	20	10	30
		1 rpo
		2.41											2.77											2.45
		3.40825	90	100	100	100	100	98					3.91737	70	80	100	80	70	80					3.46482	90	60	90	80	70	78
		2.41	60	90	60	70	100	76					2.77	60	60	80	60	70	66					2.45	80	70	90	90	40	74
		1.70413	70	70	90	80	70	76					1.95869	60	30	60	70	70	58					1.73241	40	50	30	70	50	48
		1.205	80	50	60	80	60	66					1.385	40	40	50	40	70	48					1.225	80	60	10	70	20	48
		0.852064	40	20	70	30	50	42					0.979343	40	60	30	40	50	44					0.866206	20	10	30	60	50	34
		0.6025	20	40	50	60	40	42					0.6925	30	20	40	40	30	32					0.6125	40	40	30	30	20	32
		2 rpo
		1.71											1.71											2.67
		2.41831	80	90	90	90	100	90					2.41831	90	90	70	100	90	88					3.77595	80	50	70	60	40	60
		1.71	50	80	80	70	60	68					1.71	90	90	90	90	80	88					2.67	80	50	60	60	60	62
		1.20915	40	60	30	70	60	52					1.20915	70	60	50	40	50	54					1.88798	50	50	40	50	60	50
		0.855	70	60	60	40	30	52					0.855	40	30	40	50	70	46					1.335	50	40	50	50	50	48
		0.604576	30	30	40	50	60	42					0.604576	60	30	50	30	20	38					0.943988	60	30	40	60	30	44
		0.4275	70	30	60	20	20	40					0.4275	40	30	40	50	30	38					0.6675	30	30	50	20	30	32
		4 rpo
		5											7.15											5.21
		7.07107	100	100	100	100	100	100					10.1116	80	90	70	80	70	78					7.36805	100	100	80	80	90	90
		5	70	100	80	90	80	84					7.15	90	100	80	60	60	78					5.21	90	80	70	70	80	78
		3.53553	60	50	50	70	30	52					5.05581	90	60	50	60	80	68					3.68403	70	50	90	60	90	72
		2.5	50	50	30	40	60	46					3.575	90	70	60	50	70	68					2.605	30	70	70	60	90	64
		1.76777	40	20	50	10	70	38					2.52791	50	40	50	50	50	48					1.84201	40	30	40	50	20	36
		1.25	30	50	50	40	20	38					1.7875	50	20	20	30	50	34					1.3025	40	10	30	30	40	30

## Sheet: Exp2
	L1											L2											L3											L4											L5
ripple phase reversal
	modulation rate >>>	1) 0.25	2) 0.5	3) 1	4) 2	5) 4	6) 8						1) 0.25	2) 0.5	3) 1	4) 2	5) 4	6) 8						1) 0.25	2) 0.5	3) 1	4) 2	5) 4	6) 8						1) 0.25	2) 0.5	3) 1	4) 2	5) 4	6) 8						1) 0.25	2) 0.5	3) 1	4) 2
		3.54	3.18	2.36	1.42	1.98	60						4.72	3.15	2.81	1.87	7.94	60						5.61	3.97	1.98	3.75	3.97	60						4.21	3.34	2.23	3.97	7.95	60						30	6.31	5.01	2.98
		4.2	3.37	2.5	1.5	2.36	60						5.61	2.97	2.5	2.65	9.44							3.34	2.97	2.65	1.87	3.97	60						4.2	5.9	2.65	3.15	3.54	60						8.92	5.9	4.68	5.26
		3.75	2.67	2.36	2.25	2.36	60						7.94	4.72	3.15	7.49	6.68							4.2	3.34	2.81	2.5	4.73							5.95	2.97	1.97	3.94	8.42							6.31	7.02	3.31	5.3
					1.78	2.5							3.97	5.61	2.65	2.65	5.3							3.54			2.98								5.95	4.45	2.1	2.48	7.08							14.16	10.01	2.78	8.84
		3.82027	3.0586	2.40577	1.70901	2.29143	60	.					5.37501	3.96728	2.76726	3.14923	7.1773	60	.					4.08546	3.40224	2.45211	2.68848	4.20869	60	.					5.00197	4.01725	2.22361	3.32477	6.39998	60	.					12.435	7.15176	3.83256	5.20574
		1) 0.25	2) 0.5	3) 1	4) 2	5) 4	6) 8						1) 0.25	2) 0.5	3) 1	4) 2	5) 4	6) 8						1) 0.25	2) 0.5	3) 1	4) 2	5) 4	6) 8						1) 0.25	2) 0.5	3) 1	4) 2	5) 4	6) 8						1) 0.25	2) 0.5	3) 1	4) 2
		3.57	1.89	1.41	1.89	3.36	60						4.21	3.54	2.65	3.34	8.92	60						5.3	3.54	2.11	1.67	7.5	60						5.01	4.46	2.81	2.36	4.21	60						4.21	3.54	3.34	3.15
		4	2.67	1.78	1.5	4.5	60						4.2	3.97	2.97	4.45	8.34							5.62	5	7.95	1.77	4.96							4.68	4.96	2.36	3.72	4.42	60						9.36	4.17	2.78	4.17
		4	2.83	1.78	1.89	3.57	60						4.72	3.97	2.81	4.2	3.94							7.5	8.41	2.21	2.5	3.51							6.24	3.75	2.63	3.34	3.97							7.5	12.5	2.5	5.3
		4.49	3	1.5	1.68	4.2	60						5.01	2.21	2.36	2.5	6.31							6.68	5.95	2.78		2.81							4.73	4.73	2.5	2.63	4.17							7.5	3.75	2.81	3.15
		4.00183	2.55841	1.60893	1.73213	3.88032	60	.					4.52197	3.3323	2.68785	3.53447	6.55789	60	.					6.21531	5.45534	3.18619	1.9478	4.37662	60	.					5.129	4.45069	2.56968	2.96339	4.18946	60	.					6.86152	5.12885	2.8419	3.84821
ripple detection
	modulation rate >>>	1) 0.25	2) 0.5	3) 1	4) 2	5) 4	6) 8	7) 16					1) 0.25	2) 0.5	3) 1	4) 2	5) 4	6) 8	7) 16					1) 0.25	2) 0.5	3) 1	4) 2	5) 4	6) 8	7) 16					1) 0.25	2) 0.5	3) 1	4) 2	5) 4	6) 8	7) 16					1) 0.25	2) 0.5	3) 1	4) 2
		3.75	3.36	2.25	3.78	3.17	4.76	10					9.45	11.24	8.92	5.01	3.75	8.42	11.24					14.16	12.61	5.95	6.31	15	15.89	15					33.67	14.16	7.95	5.3	6.31	9.45	12.61					13.36	8.42	7.5	7.08
		5.05	3.78	2.81	2.38	3.78	5.66	8.91					12.61	5.9	4.68	6.62	5.01	5.3	11.24					22.47	10.01	5.57	4.73	14.16	7.5	8.92					12.61	7.95	4.73	3.54	2.65	6.68	13.36					22.47	15	9.45	11.91
		8.49	3.56	2.65	3.78	3.78	6.35	6.35					15.75	5.9	4.42	4.42	4.68	11.24	9.45					15	6.31	8.42	5.62	5.95	13.36	15.89					17.84	5.62	5.3	3.75	3.97	7.08	11.91					15.89	7.08	5.95	6.31
		5.66	6	2.97	3.34	3.57	7.55	9.52					33.67	10.51	3.31	4.45	4.68	7.88	17.84					17.84	10.61	5.3	5.62	7.5	11.91	11.91					12.61	8.92	5.3	3.54	2.5	6.31						5.62	6.31	4.68	3.97
		5.49239	4.05843	2.65597	3.26458	3.56597	5.99496	8.56687					15.8551	8.00789	4.97125	5.05382	4.50391	7.92903	12.0806					17.082	9.5879	6.2014	5.54103	9.86696	11.7348	12.6146					17.5799	8.66728	5.70092	3.97263	3.58923	7.28732	12.6128					12.7958	8.66695	6.66521	6.7794
[truncated: 3 more columns]

## Sheet: Exp3, two target bands
	L1											L2											L3											L4											L5
masked, two-band
	modulation rate, rpo >>	2) 0.5	2) 0.5	2) 0.5	2) 0.5								2) 0.5	2) 0.5	2) 0.5	2) 0.5								2) 0.5	2) 0.5	2) 0.5	2) 0.5								2) 0.5	2) 0.5	2) 0.5	2) 0.5								2) 0.5	2) 0.5	2) 0.5	2) 0.5
	band type by freq region >>	7) mTTmmmm	8) mmTTmmm	9) mmmTTmm	10) mmmmTTm								7) mTTmmmm	8) mmTTmmm	9) mmmTTmm	10) mmmmTTm								7) mTTmmmm	8) mmTTmmm	9) mmmTTmm	10) mmmmTTm								7) mTTmmmm	8) mmTTmmm	9) mmmTTmm	10) mmmmTTm								7) mTTmmmm	8) mmTTmmm	9) mmmTTmm	10) mmmmTTm
		5	4.45	3.54	6.67								14.16	3.75	4.46	6.31								10.01	8.92	6.31	8.42								7.56	6.67	6.3	9.9								20.02	10.61	8.42	3.15
		10	4.45	7.07	4.72								7.08	7.94	8.42	4.73								7.95	7.95	7.95	7.49								5.99	4.6	16.65	22.45								14.16	7.08	5.95	6.31
		8.91	7.49	4.72	3.75								11.8	15	4.21	5.3								7.07	12.61	8.91	10.61								8.99	7.07	8.02	19.44								10.61	7.95	5.57	4.46
		5.95	4.45	5.61	4.45								8.42	10.01	11.89	6.31								15.89	13.36	6.31	6.62								10.7	5.62	12.7	38.88								15	6.31	8.41	7.88
		7.17532	5.06863	5.07378	4.78757								9.99016	8.17701	6.58457	5.62081								9.7238	10.4547	7.28746	8.15815								8.12406	5.90894	10.1668	20.245								14.5742	7.83495	6.96017	5.14103
		1) adaptive	1) adaptive	1) adaptive	1) adaptive								1) adaptive	1) adaptive	1) adaptive	1) adaptive								1) adaptive	1) adaptive	1) adaptive	1) adaptive								1) adaptive	1) adaptive	1) adaptive	1) adaptive								1) adaptive	1) adaptive	1) adaptive	1) adaptive
		3) 1	3) 1	3) 1	3) 1								3) 1	3) 1	3) 1	3) 1								3) 1	3) 1	3) 1	3) 1								3) 1	3) 1	3) 1	3) 1								3) 1	3) 1	3) 1	3) 1
		7) mTTmmmm	8) mmTTmmm	9) mmmTTmm	10) mmmmTTm								7) mTTmmmm	8) mmTTmmm	9) mmmTTmm	10) mmmmTTm								7) mTTmmmm	8) mmTTmmm	9) mmmTTmm	10) mmmmTTm								7) mTTmmmm	8) mmTTmmm	9) mmmTTmm	10) mmmmTTm								7) mTTmmmm	8) mmTTmmm	9) mmmTTmm	10) mmmmTTm
		4.2	2.5	2.23	3.75								17.84	10.01	5.3	11.24								7.5	3.75	5.3	5.3								5.95	3.78	4.76	12								7.95	3.97	5.3	11.91
		4.45	2.1	2.65	2.5								7.5	3.97	10.61	8.42								3	3.75	3.97	5.95								4.2	3.93	4.5	7.94								11.91	5.62	7.08	5.01
		3.54	2.36	3.34	3.34								15.89	8.92	5.62	7.08								5.95	4.45	4.45	7.49								7.14	4	5.35	7.07								5.62	4.21	6.68	5.62
		3.75	2.65	3.75	2.97								9.45	5.62	3.75	12.61								4.72	2.65	4.21	2.23								6.35	4.5	5.01	4.76								7.08	7.95	5.9	8.91
		3.96882	2.39375	2.93314	3.10541								11.9056	6.68085	5.86732	9.58753								5.01372	3.58853	4.45581	4.79065								5.80176	4.0438	4.895	7.52501								7.83451	5.2275	6.20132	7.39334
		4) 2	4) 2	4) 2	4) 2								4) 2	4) 2	4) 2	4) 2								4) 2	4) 2	4) 2	4) 2								4) 2	4) 2	4) 2	4) 2								4) 2	4) 2	4) 2	4) 2
		7) mTTmmmm	8) mmTTmmm	9) mmmTTmm	10) mmmmTTm								7) mTTmmmm	8) mmTTmmm	9) mmmTTmm	10) mmmmTTm								7) mTTmmmm	8) mmTTmmm	9) mmmTTmm	10) mmmmTTm								7) mTTmmmm	8) mmTTmmm	9) mmmTTmm	10) mmmmTTm								7) mTTmmmm	8) mmTTmmm	9) mmmTTmm	10) mmmmTTm
		6.35	3.56	2.36	4								15	10.01	6.31	5.95								5.62	4.73	2.65	9.45								8.99	6.73	2.67	4.72								40.05	7.5	7.08	6.68
		4.01	3.75	2.67	2.81								26.73	17.82	7.5	6.31								6.68	3.72	2.36	3.97								7.94	5.04	5.05	9								22.47	6.31	6.68	7.5
		10.09	5	2.38	3.34								21.21	10.61	8.42	4.46								5.62	2.81	2.81	6.3								7.49	4.24	2.83	5.67								31.78	8.92	8.42	5.62
		6.74	2.65	3.78	2.81								33.67	5.62	6.31	16.84								6.36	4.68	6.74	3.97								7.49	5.05	4.2	10.69								18.9	11.24	4.21	7.94
		6.45086	3.6469	2.74393	3.20483								23.1323	10.1554	7.08122	7.28712								6.05239	3.90022	3.29899	5.53463								7.95492	5.1913	3.55803	7.12338								27.1147	8.29957	6.39884	6.8762
		5) 4	5) 4	5) 4	5) 4								5) 4	5) 4	5) 4	5) 4								5) 4	5) 4	5) 4	5) 4								5) 4	5) 4	5) 4	5) 4								5) 4	5) 4	5) 4	5) 4
		7) mTTmmmm	8) mmTTmmm	9) mmmTTmm	10) mmmmTTm								7) mTTmmmm	8) mmTTmmm	9) mmmTTmm	10) mmmmTTm								7) mTTmmmm	8) mmTTmmm	9) mmmTTmm	10) mmmmTTm								7) mTTmmmm	8) mmTTmmm	9) mmmTTmm	10) mmmmTTm								7) mTTmmmm	8) mmTTmmm	9) mmmTTmm	10) mmmmTTm
		60	5.04	4.2	6.3								60	15	7.5	18.9								60	21.21	23.84	6.68								60	8.42	7.08	8.92								60	37.8	35.68	11.24
		60	6	6.67	2.97								60	42.43	20.02	31.78								40.05	9.82	14.16	14.98								60	12.01	6.68	15.14								60	35.68	47.62	10.61
		60	6.36	7.49	3.15								60	31.78	12.61	5.01								26.73	12.61	5.3	11.24								60	12.71	11.58	7.94									40.05	25.23	25.23
		60	6	7.07	4.2									20.05	15.89	8.92									13.36	6.3	5.95									11.89	8.91	14.98									33.67	44.95	25.23
		60	5.82838	6.2061	3.96656								60	25.2353	13.1702	12.7998								40.0483	13.6865	10.3038	9.04467								60	11.1185	8.35794	11.2579								60	36.7232	37.2576	16.5989
		2) 0.5	2) 0.5	2) 0.5	2) 0.5								2) 0.5	2) 0.5	2) 0.5	2) 0.5								2) 0.5	2) 0.5	2) 0.5	2) 0.5								2) 0.5	2) 0.5	2) 0.5	2) 0.5								2) 0.5	2) 0.5	2) 0.5	2) 0.5
		11) 0TToooo	12) ooTTooo	13) oooTToo	14) ooooTTo								11) 0TToooo	12) ooTTooo	13) oooTToo	14) ooooTTo								11) 0TToooo	12) ooTTooo	13) oooTToo	14) ooooTTo								11) 0TToooo	12) ooTTooo	13) oooTToo	14) ooooTTo								11) 0TToooo	12) ooTTooo	13) oooTToo	14) ooooTTo
		5.3	8.41	5	5.3								10.61	8.92	4.21	7.5								7.95	13.36	10.61	7.95								8.41	7.94	6.67	5.99								7.08	8.42	4.73	6.31
		5.3	6.67	3.75	7.49								11.8	7.94	7.07	5.95								18.9	5.3	10.61	6.68								7.55	6.73	8.48	6.73								7.88	8.41	4.72	5
		5.61	6	4.72	3.37								8.34	7.94	7.95	11.24								8.42	5.95	5.3	7.5								9.51	8.48	6.74	5.66								9.92	10.01	5.61	7.94
		5.3	6	5.05	7.13								9.44	8.41	12.6	15.87								5.62	11.24	11.24	12.61								9.44	6.73	6.73	7.42								8.92	8.91	7.08	6.68
		5.37586	6.70357	4.59789	5.55737								9.964	8.29279	7.38941	9.44562								9.18268	8.29548	9.04937	8.41841								8.68908	7.43125	7.11704	6.41454								8.38222	8.91466	5.45695	6.39586
		3) 1	3) 1	3) 1	3) 1								3) 1	3) 1	3) 1	3) 1								3) 1	3) 1	3) 1	3) 1								3) 1	3) 1	3) 1	3) 1								3) 1	3) 1	3) 1	3) 1
		11) 0TToooo	12) ooTTooo	13) oooTToo	14) ooooTTo								11) 0TToooo	12) ooTTooo	13) oooTToo	14) ooooTTo								11) 0TToooo	12) ooTTooo	13) oooTToo	14) ooooTTo								11) 0TToooo	12) ooTTooo	13) oooTToo	14) ooooTTo								11) 0TToooo	12) ooTTooo	13) oooTToo	14) ooooTTo
		5	3.34	1.98	3.97								5	5.04	4.76	6.35								6.68	3.34	3.34	3.75								4.72	4.24	4.24	4.01								5.62	5.3	3.15	3.97
		2.97	3.57	3.17	3.93								6.3	4.2	4.25	4.1								5.62	3.31	4.45	3.15								5.05	3.78	3.18	3.37								3.97	6.3	3.15	4.45
		3.18	3.18	3.78	5.89								7.14	7.55	2.68	9.52								5	5.3	3.75	4.73								5.66	3.78	3	4.24								5.61	4.46	4.72	13.35
		4.76	2.78	2.83	3.56								6.35	5.04	12.73	8								2.97	2.97	3.97	6.3								5	3.18	3.18	3.37								5.61	4.72	6.67	4.72
		3.87204	3.20422	2.86253	4.25292								6.14746	5.32739	5.12554	6.673								4.85914	3.63205	3.85684	4.33148								5.0963	3.72558	3.36772	3.72771								5.1477	5.14901	4.20409	5.77622
		4) 2	4) 2	4) 2	4) 2								4) 2	4) 2	4) 2	4) 2								4) 2	4) 2	4) 2	4) 2								4) 2	4) 2	4) 2	4) 2								4) 2	4) 2	4) 2	4) 2
		11) 0TToooo	12) ooTTooo	13) oooTToo	14) ooooTTo								11) 0TToooo	12) ooTTooo	13) oooTToo	14) ooooTTo								11) 0TToooo	12) ooTTooo	13) oooTToo	14) ooooTTo								11) 0TToooo	12) ooTTooo	13) oooTToo	14) ooooTTo								11) 0TToooo	12) ooTTooo	13) oooTToo	14) ooooTTo
		4.76	2.67	2.65	2.97								7.08	7.95	4.21	3.97								3.75	3.34	2.98	3.34								3.97	4	3.18	3.78								10.01	2.98	5.3	4.21
		2.83	2.52	3.18	4.67								12.61	16.69	13.35	7.5								8.41	5.3	3.15	3.15								4.24	2.67	2.67	4.24								8.42	4.46	3.75	5.62
		3	2.52	2.38	2.12								7.95	30	5.95	6.31								3.15	3.15	2.1	2.81								3.36	3.36	3.56	3.18								13.36	3.15	4.46	7.08
		4	3.18	2.83	2.81								12.61	7.08	4.21	10.61								3.97	4.72	2.94	4.41								4.76	2.83	3	3.36								8.92	3.54	9.45	9.36
		3.56569	2.70979	2.74479	3.01494								9.72652	12.9567	6.12549	6.68189								4.45638	4.02781	2.75914	3.3791								4.05066	3.17449	3.08587	3.61748								10.011	3.48912	5.37983	6.29263
		5) 4	5) 4	5) 4	5) 4								5) 4	5) 4	5) 4	5) 4								5) 4	5) 4	5) 4	5) 4								5) 4	5) 4	5) 4	5) 4								5) 4	5) 4	5) 4	5) 4
		11) 0TToooo	12) ooTTooo	13) oooTToo	14) ooooTTo								11) 0TToooo	12) ooTTooo	13) oooTToo	14) ooooTTo								11) 0TToooo	12) ooTTooo	13) oooTToo	14) ooooTTo								11) 0TToooo	12) ooTTooo	13) oooTToo	14) ooooTTo								11) 0TToooo	12) ooTTooo	13) oooTToo	14) ooooTTo
		60	6.67	5.34	2.81								60	35.68	11.91	8.42								7.08	5.62	3.75	4.21								60	9.44	6.67	4.45								60	60	23.81	35.68
		60	6	5.3	4.01								35.68	26.73	15	10.01								8.92	5.62	3.31	7.43								60	17.82	3	3.57								60	60	28.32	33.67
		21.21	7.56	5	3.78								60	25.23	28.32	7.079								11.24	5.3	3.15	4.72								44.95	20.95	6.36	5.66									60	26.73	15
		44.95	5.3	5	5.35								50.45	40.05	17.84	7.08								18.73	5.95	5.3	3.54								60	11.91	3.37	6.36										60	44.95
		43.0421	6.32803	5.1575	3.8853								50.4542	31.3318	17.333	8.06191								10.7381	5.6178	3.79412	4.78139								55.8208	14.3134	4.55076	4.89019								60	60	32.2478	30.0001

## Sheet: Exp3, one-band
	L1											L2											L3											L4											L5
	modulation rate, rpo >>	3) 1	3) 1	3) 1	3) 1	3) 1							3) 1	3) 1	3) 1	3) 1	3) 1							3) 1	3) 1	3) 1	3) 1	3) 1							3) 1	3) 1	3) 1	3) 1	3) 1							3) 1	3) 1	3) 1	3) 1
	band type by freq region >>	2) mTmmmmm	3) mmTmmmm	4) mmmTmmm	5) mmmmTmm	6) mmmmmTm							2) mTmmmmm	3) mmTmmmm	4) mmmTmmm	5) mmmmTmm	6) mmmmmTm							2) mTmmmmm	3) mmTmmmm	4) mmmTmmm	5) mmmmTmm	6) mmmmmTm							2) mTmmmmm	3) mmTmmmm	4) mmmTmmm	5) mmmmTmm	6) mmmmmTm							2) mTmmmmm	3) mmTmmmm	4) mmmTmmm	5) mmmmTmm
		8.42	4.45	3.36	6.73	5.61							28.32	7.5	20.02	11.91	13.36							11.91	6.31	4.73	5.62	25.23							11.89	7.07	7.07	11.22	23.78							47.62	16.84	5.95	6.68
		8.98	4.45	5.35	8.01	7.14							30	40.05	10.61	7.5	6.31							13.47	8.01	4.45	4.5	44.9							11.89	7.5	5.95	7.49	26.73							60	8.42	9.44	5.26
		13.35	4.25	3.15	5.3	6.3							31.78	9.45	8.92	7.5	15							10.32	10.08	6.01	7.07	20.02							20	7.49	6.68	10.61	37.8							60	13.36	12.61	5.26
		8.91	2.68	4.76	5.62	3.87							37.8	13.36	15.89	10.61	23.81							9.25	10.08	4.5	30	22.45							8.41	10	4.76	9.44	21.21							40.05	13.36	8.42	5.9
		9.73838	3.87535	4.05184	6.33016	5.59021							31.7845	13.9549	13.1725	9.182	13.1726							11.1244	8.46537	4.88458	8.558	26.7123							12.4179	7.93854	6.04756	9.57835	26.7184							51.1886	12.613	8.78778	5.74645
		4) 2	4) 2	4) 2	4) 2	4) 2							4) 2	4) 2	4) 2	4) 2	4) 2							4) 2	4) 2	4) 2	4) 2	4) 2							4) 2	4) 2	4) 2	4) 2	4) 2							4) 2	4) 2	4) 2	4) 2
		2) mTmmmmm	3) mmTmmmm	4) mmmTmmm	5) mmmmTmm	6) mmmmmTm							2) mTmmmmm	3) mmTmmmm	4) mmmTmmm	5) mmmmTmm	6) mmmmmTm							2) mTmmmmm	3) mmTmmmm	4) mmmTmmm	5) mmmmTmm	6) mmmmmTm							2) mTmmmmm	3) mmTmmmm	4) mmmTmmm	5) mmmmTmm	6) mmmmmTm							2) mTmmmmm	3) mmTmmmm	4) mmmTmmm	5) mmmmTmm
		15.89	6.62	5.05	4.24	8.98							60	17.84	11.91	7.08	8.92							42.43	8.92	3.97	7.5	47.62							37.8	14.98	5.95	19.03	60							60	12.61	8.42	14.16
		20.02	5.66	6.67	4	4.72							42.43	26.73	14.16	7.95	8.92							30	7.95	6.67	6.31	11.89							40.05	11.91	5.04	11.24	44.51							60	28.32	11.91	12.61
		16.84	6	7.13	4.24	4.24							60	20.02	5.62	5.3	8.42							18.9	20.16	7.95	8.41	14.14							37.43	8.99	5.95	10.59	60							60	18.9	8.42	16.84
		16.84	6	5.04	2.84	6.74							60	14.16	10.51	9.44	8.41							42.43	9.45	5.34	5.04	23.55							35.33	8.41	4.72	10	33.67								14.16	7.08	28.32
		17.3308	6.0603	5.8984	3.78031	5.89944							55.0214	19.1748	9.9903	7.28471	8.66382							31.7857	10.7811	5.79037	6.69236	20.8378							37.6153	10.7769	5.38706	12.268	48.1949							60	17.5826	8.79311	17.0826
		5) 4	5) 4	5) 4	5) 4	5) 4							5) 4	5) 4	5) 4	5) 4	5) 4							5) 4	5) 4	5) 4	5) 4	5) 4							5) 4	5) 4	5) 4	5) 4	5) 4							5) 4	5) 4	5) 4	5) 4
		2) mTmmmmm	3) mmTmmmm	4) mmmTmmm	5) mmmmTmm	6) mmmmmTm							2) mTmmmmm	3) mmTmmmm	4) mmmTmmm	5) mmmmTmm	6) mmmmmTm							2) mTmmmmm	3) mmTmmmm	4) mmmTmmm	5) mmmmTmm	6) mmmmmTm							2) mTmmmmm	3) mmTmmmm	4) mmmTmmm	5) mmmmTmm	6) mmmmmTm							2) mTmmmmm	3) mmTmmmm	4) mmmTmmm	5) mmmmTmm
		60	33.67	31.78	7.08	9.44							60	60	47.62	31.78	22.47							60	11.91	7.08	5.99	11.91							60	60	11.22	18.88	28.32							60	60	21.21	60
		60	35.68	17.84	8.92	11.89							60	60	44.95	22.47	42.43							60	23.31	6.68	7.14	14.16							60	60	9.44	47.62	47.62							60	60	20.02	22.47
		60	60	10.01	10.08	17.82								60	33.67	18.9	18.9							60	18.9	7.14	7.5	8.19							60	60	44	29.97	60							60	60	15	17.84
		60	60	14.03	8.41	10.59									60	20.02	11.24							60	22.47	22.22	4.73	10.59							60	60	30	23.78	60									18.9	22.47
		60	45.6029	16.7981	8.55389	12.0639							60	60	45.6014	22.7993	21.2142							60	18.5302	9.30707	6.24111	10.9974							60	60	19.3368	28.2926	46.9403							60	60	18.6269	27.1137
		3) 1	3) 1	3) 1	3) 1	3) 1							3) 1	3) 1	3) 1	3) 1	3) 1							3) 1	3) 1	3) 1	3) 1	3) 1							3) 1	3) 1	3) 1	3) 1	3) 1							3) 1	3) 1	3) 1	3) 1
		15) 0Tooooo	16) ooToooo	17) oooTooo	18) ooooToo	19) oooooTo							15) 0Tooooo	16) ooToooo	17) oooTooo	18) ooooToo	19) oooooTo							15) 0Tooooo	16) ooToooo	17) oooTooo	18) ooooToo	19) oooooTo							15) 0Tooooo	16) ooToooo	17) oooTooo	18) ooooToo	19) oooooTo							15) 0Tooooo	16) ooToooo	17) oooTooo	18) ooooToo
		5	2.83	3.57	5.34	4.24							10.01	7.5	3.97	7.08	5.3							15.89	10.01	8.42	8.42	21.21							7.95	4.76	3.78	3.56	6.35							11.91	5.01	4.46	3.75
		7.07	4.24	4.41	4.72	5.3							7.95	7.5	4.17	5.01	4.73							11.24	7.88	5.01	4.46	7.95							10.68	4.76	4.67	5.56	5.66							16.84	5.3	3.51	5.3
		4.41	3.34	4.24	3.97	5.95							8.42	4.73	2.36	4.45	4.68							5.62	6.68	5.95	6.31	6.68							5	6.01	3.78	3.18	5.35							10.61	5.3	2.1	5.61
		4.72	4.24	3.78	5	4.72							10.01	5.9	5.3	4.68	4.73							7.88	5.01	5.26	5.57	7.02							12.73	5.04	4	3.97	5.04							15	4.2	2.81	5
		5.20826	3.61049	3.98558	4.72945	5.01216							9.04976	6.29447	3.7934	5.21338	4.85357							9.43058	7.16793	6.02786	6.02744	9.42986							8.57401	5.11835	4.04194	3.9759	5.57948							13.3664	4.93071	3.10022	4.85915
		4) 2	4) 2	4) 2	4) 2	4) 2							4) 2	4) 2	4) 2	4) 2	4) 2							4) 2	4) 2	4) 2	4) 2	4) 2							4) 2	4) 2	4) 2	4) 2	4) 2							4) 2	4) 2	4) 2	4) 2
		15) 0Tooooo	16) ooToooo	17) oooTooo	18) ooooToo	19) oooooTo							15) 0Tooooo	16) ooToooo	17) oooTooo	18) ooooToo	19) oooooTo							15) 0Tooooo	16) ooToooo	17) oooTooo	18) ooooToo	19) oooooTo							15) 0Tooooo	16) ooToooo	17) oooTooo	18) ooooToo	19) oooooTo							15) 0Tooooo	16) ooToooo	17) oooTooo	18) ooooToo
		8.48	3.18	3.36	3	5.05							25.23	6.68	6.68	3.97	4.73							7.95	5.3	9.45	14.16	7.5							9.45	5.3	3.97	5.66	8.41							60	5.95	4.73	4.46
		7.13	3.78	3.37	2.67	4.2							16.84	7.43	7.43	4.73	11.89							16.84	5.3	5.01	9.45	11.91							14.14	5.3	5.34	4.54	5.66							40.05	3.34	5.01	7.5
		5.3	4.01	3.57	2.83	7.94							25.23	5.3	7.08	5.3	11.14							11.91	11.91	11.8	15	13.36							6.89	3.75	3.97	3.34	7							44.95	3.97	3.75	10.61
		6.74	3.36	3.37	2.38	4.76							12.61	5.01	5.95	3.75	3.34							31.78		5.95	7.5	10.01							30	3.97	5	4	7.95							21.21	7.94	8.42	4.46
		6.81719	3.56739	3.41639	2.71019	5.32098							19.1745	6.02518	6.76206	4.39531	6.76346							15.0035	6.94205	7.59307	11.0767	10.4545							12.8916	4.52213	4.52922	4.30447	7.17413							38.9051	5.00286	5.23011	6.30756
		5) 4	5) 4	5) 4	5) 4	5) 4							5) 4	5) 4	5) 4	5) 4	5) 4							5) 4	5) 4	5) 4	5) 4	5) 4							5) 4	5) 4	5) 4	5) 4	5) 4							5) 4	5) 4	5) 4	5) 4
		15) 0Tooooo	16) ooToooo	17) oooTooo	18) ooooToo	19) oooooTo							15) 0Tooooo	16) ooToooo	17) oooTooo	18) ooooToo	19) oooooTo							15) 0Tooooo	16) ooToooo	17) oooTooo	18) ooooToo	19) oooooTo							15) 0Tooooo	16) ooToooo	17) oooTooo	18) ooooToo	19) oooooTo							15) 0Tooooo	16) ooToooo	17) oooTooo	18) ooooToo
		60	6.74	4.5	3.57	7.13							60	33.67	6.68	5.62	6.31							60	33.37	8.92	9.45	8.92							60	33.64	11.91	5.62	7.5							60	60	35.68	8.92
		60	7.56	4.25	3.78	6.3							60	22.47	7.08	4.46	9.36							60	13.36	6.31	7.08	9.45							60	60	6.93	5.61	8.48							60	50.45	11.91	13.36
		60	9.34	6.01	3.3	6.68							60	37.8	6.68	6.31	10.01								11.24	35.68	30	10.01							60	60	5.04	4.01	7.55								40.05	7.5	6.31
		60	8.99	5.05	4.41	5.24								16.84	6.68	5.62	10.01								17.84	9.45	20.02	7.88							60	60	5	5	5.04								33.67	11.24	7.95
		60	8.08764	4.90842	3.7435	6.29701							60	26.3433	6.77783	5.46021	8.77088							60	17.2914	11.7372	14.1583	9.03003							60	51.9191	6.75323	5.01422	7.01389							60	44.9484	13.7575	8.7931
[truncated: 1 more columns]

## Sheet: Exp4
	mod rate		resp				Modulation depth jitter by band (factor)
	rpo	ObsNum	correct=1	125 Hz	250 Hz	500 Hz	1000 Hz	2000 Hz	4000 Hz	8000 Hz
	0.25	1	1	1	0.416233	1	1	0.416233	0.416233	0.645161
	0.25	1	0	1	1.55	2.4025	0.416233	2.4025	0.416233	1.55
	0.25	1	1	0.645161	0.416233	0.416233	1.55	0.645161	0.416233	2.4025
	0.25	1	1	1	0.416233	0.416233	0.416233	1	1.55	1.55
	0.25	1	1	0.416233	1.55	1	1	0.645161	1.55	0.416233
	0.25	1	1	0.416233	2.4025	0.645161	2.4025	0.416233	1.55	2.4025
	0.25	1	1	1	0.416233	1	0.645161	2.4025	1	2.4025
	0.25	1	1	0.416233	0.416233	1	0.416233	2.4025	1	2.4025
	0.25	1	1	1	1	1.55	0.645161	0.416233	1	0.416233
	0.25	1	1	1.55	0.416233	1	1	0.416233	0.645161	2.4025
	0.25	1	1	0.416233	0.416233	2.4025	2.4025	0.416233	1.55	0.416233
	0.25	1	1	1	2.4025	0.645161	1.55	2.4025	1	0.416233
	0.25	1	0	0.416233	2.4025	1	1.55	1.55	0.645161	2.4025
	0.25	1	0	0.645161	1.55	2.4025	1	0.416233	1	1
	0.25	1	1	2.4025	0.416233	1.55	1	1.55	0.645161	2.4025
	0.25	1	1	0.416233	0.416233	1	1	0.416233	2.4025	0.416233
	0.25	1	1	0.645161	1	2.4025	0.645161	1.55	1.55	1.55
	0.25	1	0	0.416233	1	0.416233	1	1	1.55	1.55
	0.25	1	1	0.416233	2.4025	1.55	0.416233	1	0.416233	0.416233
	0.25	1	0	2.4025	1.55	1	0.645161	1	0.645161	2.4025
	0.25	1	1	1	2.4025	2.4025	1	1	1.55	0.416233
	0.25	1	1	1	1	0.416233	2.4025	1	2.4025	0.645161
	0.25	1	0	0.645161	2.4025	0.416233	1.55	0.416233	2.4025	2.4025
	0.25	1	0	0.416233	1.55	0.645161	0.645161	1.55	1.55	0.645161
	0.25	1	0	1	1.55	0.416233	0.645161	0.645161	0.416233	2.4025
	0.25	1	1	0.416233	1	0.645161	0.416233	0.645161	2.4025	0.645161
	0.25	1	0	1	1	0.645161	2.4025	1	1	1.55
	0.25	1	0	0.645161	1.55	0.645161	1.55	2.4025	2.4025	1.55
	0.25	1	1	0.416233	0.416233	1	0.645161	1	1	2.4025
	0.25	1	0	2.4025	1	1	0.645161	0.645161	2.4025	0.645161
	0.25	1	1	1	0.416233	0.416233	2.4025	1	1.55	0.416233
	0.25	1	1	0.645161	2.4025	0.416233	2.4025	0.416233	0.416233	1.55
	0.25	1	1	1	0.416233	1	2.4025	0.645161	0.416233	1
	0.25	1	1	0.645161	1.55	0.416233	0.416233	2.4025	1.55	1.55
	0.25	1	1	1	1	0.645161	1.55	2.4025	0.416233	0.645161
	0.25	1	1	0.645161	0.645161	0.645161	0.645161	1	1.55	0.645161
	0.25	1	1	1.55	0.645161	1.55	0.416233	0.645161	0.416233	2.4025
	0.25	1	1	0.416233	1.55	2.4025	0.416233	2.4025	1.55	0.416233
	0.25	1	1	1.55	0.416233	0.416233	1	1.55	0.645161	1
	0.25	1	1	1	0.416233	1	1	1	2.4025	0.416233
	0.25	1	1	2.4025	1.55	1	1	0.416233	1.55	1.55
	0.25	1	1	1	1	2.4025	0.416233	1.55	1	1
	0.25	1	1	1.55	0.416233	1.55	0.645161	1	1.55	0.645161
	0.25	1	1	0.645161	2.4025	1	0.645161	2.4025	1.55	0.645161
	0.25	1	0	0.645161	2.4025	0.416233	1	0.416233	0.645161	2.4025
	0.25	1	0	2.4025	0.645161	1	1	0.645161	1.55	1
	0.25	1	1	2.4025	2.4025	1.55	2.4025	0.416233	0.416233	0.645161
	0.25	1	1	0.645161	0.416233	0.645161	1.55	0.416233	0.416233	2.4025
	0.25	1	1	1	0.645161	0.416233	1	2.4025	0.416233	2.4025
	0.25	1	0	1.55	0.645161	1.55	1.55	2.4025	1.55	0.416233
	0.25	1	1	1	1	0.645161	1.55	0.645161	2.4025	1.55
	0.25	1	1	2.4025	1.55	1.55	0.416233	1.55	0.645161	0.645161
	0.25	1	1	0.416233	1.55	0.416233	1.55	0.645161	1	0.645161
	0.25	1	1	0.645161	1.55	0.645161	1	0.645161	0.416233	0.416233
	0.25	1	0	1.55	1	1.55	2.4025	1.55	0.645161	2.4025
	0.25	1	0	1	1	2.4025	2.4025	0.645161	0.416233	2.4025
	0.25	1	1	1.55	0.416233	0.645161	1	0.645161	0.645161	0.645161
	0.25	1	0	1	1	0.416233	0.645161	0.416233	2.4025	2.4025
	0.25	1	1	1.55	1	0.416233	1	2.4025	0.645161	1.55
	0.25	1	0	2.4025	1.55	0.416233	0.416233	0.645161	2.4025	0.645161
	0.25	1	1	1.55	1.55	0.645161	0.416233	0.416233	0.645161	1.55
	0.25	1	0	2.4025	1	0.645161	1	0.645161	2.4025	1
	0.25	1	1	0.645161	2.4025	0.416233	0.645161	0.416233	2.4025	2.4025
	0.25	1	1	1.55	2.4025	0.645161	0.645161	0.645161	0.645161	0.416233
	0.25	1	1	2.4025	1.55	2.4025	0.645161	0.645161	1.55	2.4025
	0.25	1	1	1	0.645161	1	0.645161	1.55	1	0.645161
	0.25	1	1	1	1.55	0.645161	1	1	1.55	2.4025
	0.25	1	0	0.645161	0.416233	1	2.4025	0.416233	0.645161	0.416233
	0.25	1	1	2.4025	0.645161	0.645161	0.645161	0.645161	1.55	2.4025
	0.25	1	0	2.4025	2.4025	1.55	0.645161	0.645161	1	0.645161
	0.25	1	1	1	1.55	1.55	1	1	1.55	2.4025
	0.25	1	1	1.55	0.645161	1.55	0.416233	0.416233	1.55	1.55
	0.25	1	0	2.4025	0.645161	1.55	0.416233	0.416233	0.645161	0.645161
	0.25	1	0	1	1	0.645161	1.55	0.645161	0.645161	2.4025
	0.25	1	0	1.55	1.55	0.645161	1.55	0.416233	0.645161	0.645161
	0.25	1	0	2.4025	0.645161	0.416233	2.4025	1.55	0.416233	0.645161
	0.25	1	1	1.55	0.416233	0.645161	1.55	1.55	1	1.55
	0.25	1	1	1	0.416233	1.55	0.645161	1	2.4025	1.55
	0.25	1	0	1	1	1	1.55	1	0.645161	1
	0.25	1	1	1.55	2.4025	1	2.4025	1	1	0.416233
	0.25	1	1	0.645161	0.645161	1	1.55	1	1.55	2.4025
	0.25	1	1	0.645161	1	2.4025	2.4025	1.55	0.416233	2.4025
	0.25	1	1	1	1.55	1.55	2.4025	2.4025	0.645161	0.645161
	0.25	1	1	0.416233	2.4025	1	0.645161	0.645161	1	0.645161
	0.25	1	0	2.4025	0.416233	1	2.4025	0.416233	1.55	1
	0.25	1	0	1.55	0.416233	2.4025	0.645161	2.4025	1.55	0.645161
	0.25	1	1	0.645161	0.645161	0.416233	1.55	0.416233	2.4025	1.55
	0.25	1	0	0.416233	0.645161	2.4025	0.645161	2.4025	0.645161	2.4025
	0.25	1	1	1.55	1	2.4025	1.55	0.645161	0.645161	1
	0.25	1	1	1.55	1.55	0.645161	0.645161	0.416233	1	0.645161
	0.25	1	1	2.4025	1.55	2.4025	1	1.55	0.645161	0.645161
	0.25	1	1	2.4025	0.416233	1.55	2.4025	0.416233	0.416233	0.416233
	0.25	1	0	1.55	1.55	1	0.416233	0.416233	0.645161	1.55
	0.25	1	1	2.4025	2.4025	1	0.645161	2.4025	2.4025	1.55
	0.25	1	1	2.4025	1.55	1	0.416233	0.416233	2.4025	1
	0.25	1	1	0.645161	0.416233	1.55	0.416233	1	0.645161	0.416233
	0.25	1	1	2.4025	2.4025	1	2.4025	0.416233	0.416233	0.416233
	0.25	1	1	2.4025	1.55	1	1	1.55	1.55	2.4025
	0.25	1	0	2.4025	0.645161	2.4025	2.4025	1.55	2.4025	1
	0.25	1	1	2.4025	1	0.645161	0.645161	0.416233	1	0.416233
	0.25	1	1	1	0.645161	2.4025	2.4025	0.645161	0.416233	2.4025
	0.25	1	0	1	0.645161	0.645161	2.4025	0.645161	1.55	2.4025
	0.25	1	0	1	0.416233	2.4025	1	0.645161	1	0.645161
	0.25	1	1	2.4025	2.4025	0.645161	1.55	1.55	2.4025	1
	0.25	1	1	2.4025	1	0.416233	0.416233	1.55	1.55	2.4025
	0.25	1	1	0.416233	0.645161	2.4025	0.645161	0.645161	0.645161	0.416233
	0.25	1	1	1	1	1	0.416233	0.645161	1	0.416233
	0.25	1	1	2.4025	0.645161	1	1.55	0.645161	0.416233	1.55
	0.25	1	1	0.645161	0.645161	1	1.55	1.55	0.645161	1.55
	0.25	1	1	1.55	0.645161	2.4025	2.4025	1	2.4025	2.4025
	0.25	1	1	2.4025	1.55	1	1.55	0.645161	0.416233	1
	0.25	1	1	2.4025	0.416233	0.416233	0.416233	1	0.416233	0.645161
	0.25	1	0	0.645161	2.4025	1.55	0.645161	0.416233	1.55	0.416233
	0.25	1	0	2.4025	2.4025	1	0.645161	0.416233	0.416233	1.55
	0.25	1	1	1	0.416233	1.55	0.416233	1.55	1.55	1
	0.25	1	1	0.416233	0.645161	0.645161	1.55	1.55	0.645161	1.55
	0.25	1	1	1	1.55	1.55	0.645161	1.55	1	0.416233
	0.25	1	1	0.645161	1.55	0.645161	2.4025	1	0.416233	2.4025
	0.25	1	0	0.645161	0.416233	0.645161	2.4025	0.416233	0.416233	0.416233
	0.25	1	0	1.55	1.55	0.416233	1.55	0.416233	1	1.55
	0.25	1	1	0.645161	0.416233	1	0.416233	1	0.416233	0.645161
	0.25	1	1	0.645161	1.55	2.4025	0.645161	1.55	2.4025	0.645161
	0.25	1	0	0.416233	1	0.645161	0.416233	0.645161	2.4025	0.416233
	0.25	1	0	0.416233	1	2.4025	0.645161	1	2.4025	0.416233
	0.25	1	1	1.55	2.4025	1	0.645161	0.645161	2.4025	0.645161
	0.25	1	1	0.416233	0.416233	1.55	0.645161	1	1.55	0.645161
	0.25	1	1	0.645161	1	1.55	2.4025	2.4025	1	0.645161
	0.25	1	1	1.55	1	0.645161	1.55	2.4025	2.4025	2.4025
	0.25	1	1	1.55	0.645161	0.416233	0.645161	0.645161	0.645161	2.4025
	0.25	1	0	0.645161	0.645161	1.55	0.416233	0.416233	2.4025	1.55
	0.25	1	1	0.645161	0.645161	1	0.416233	0.416233	1.55	0.645161
	0.25	1	1	1.55	0.416233	2.4025	1	1.55	0.645161	0.416233
	0.25	1	1	0.416233	0.416233	1	1.55	0.416233	0.645161	0.645161
	0.25	1	1	1.55	2.4025	1	1	1	2.4025	1
	0.25	1	1	1	2.4025	1.55	1	0.645161	0.645161	2.4025
	0.25	1	1	0.645161	1.55	2.4025	1.55	0.416233	0.645161	0.645161
	0.25	1	1	0.416233	1	1	1.55	2.4025	2.4025	1
	0.25	1	1	2.4025	2.4025	0.645161	0.416233	1.55	2.4025	1
	0.25	1	1	0.416233	0.645161	2.4025	1	0.645161	0.416233	0.416233
	0.25	1	1	0.645161	0.416233	0.645161	1.55	1.55	1.55	1.55
	0.25	1	1	0.416233	0.416233	0.416233	1	1	0.645161	0.645161
	0.25	1	0	2.4025	1.55	1	1	1.55	0.645161	2.4025
	0.25	1	1	2.4025	2.4025	2.4025	2.4025	2.4025	2.4025	0.645161
	0.25	1	1	0.416233	0.645161	1	0.416233	2.4025	0.416233	0.416233
	0.25	1	1	0.416233	0.645161	1	0.645161	1.55	0.645161	1.55
	0.25	1	0	1.55	1	1.55	0.416233	1	1	0.416233
	0.25	1	0	0.645161	1	1	2.4025	2.4025	2.4025	0.416233
	0.25	1	0	0.645161	2.4025	1	0.645161	0.416233	0.645161	0.416233
	0.25	1	1	2.4025	2.4025	2.4025	1	1.55	1	0.645161
	0.25	1	1	0.416233	1.55	2.4025	0.645161	0.416233	1.55	0.416233
	0.25	1	0	0.645161	2.4025	1.55	0.416233	1	2.4025	0.416233
	0.25	1	0	2.4025	1.55	1.55	0.416233	2.4025	0.645161	0.416233
	0.25	1	0	0.416233	0.416233	1.55	1	0.416233	0.416233	0.416233
	0.25	1	0	1	0.645161	1.55	0.645161	0.645161	0.416233	0.645161
	0.25	1	0	0.416233	0.645161	2.4025	0.416233	0.416233	1.55	1
	0.25	1	1	0.416233	0.416233	2.4025	2.4025	1	1	1.55
	0.25	1	1	1.55	1.55	0.416233	2.4025	1	1.55	1.55
	0.25	1	1	2.4025	0.645161	2.4025	1.55	0.645161	0.645161	2.4025
	0.25	1	1	0.645161	1	2.4025	2.4025	1.55	1.55	0.645161
	0.25	1	0	0.645161	1.55	0.645161	0.416233	1	0.416233	1.55
	0.25	1	1	0.416233	1.55	0.416233	2.4025	1	1.55	0.645161
	0.25	1	1	1	1	1	0.416233	2.4025	0.645161	2.4025
	0.25	1	1	1.55	1	2.4025	1	0.416233	2.4025	0.416233
	0.25	1	1	0.645161	0.645161	0.416233	1.55	1	0.645161	1
	0.25	1	0	2.4025	1	0.416233	0.416233	0.416233	1	2.4025
	0.25	1	1	0.645161	0.645161	0.645161	0.416233	1.55	1	2.4025
	0.25	1	0	2.4025	0.645161	0.416233	0.416233	1.55	0.645161	1
	0.25	1	1	1.55	1	1.55	1.55	1.55	2.4025	0.645161
	0.25	1	0	0.416233	1.55	2.4025	0.645161	0.645161	1	0.416233
	0.25	1	1	1.55	0.645161	1	0.645161	0.416233	1	1.55
	0.25	1	0	1	0.416233	1	2.4025	1.55	1.55	1
	0.25	1	0	0.416233	1	0.416233	0.645161	1.55	0.416233	0.416233
	0.25	1	1	1.55	0.645161	2.4025	2.4025	1.55	1	0.645161
	0.25	1	0	2.4025	0.645161	0.416233	0.645161	0.645161	1.55	2.4025
	0.25	1	1	0.416233	1	1.55	2.4025	0.645161	0.645161	0.416233
	0.25	1	1	1.55	0.416233	1.55	2.4025	1.55	1	2.4025
	0.25	1	1	0.645161	1.55	0.416233	2.4025	1.55	1	0.645161
	0.25	1	0	2.4025	2.4025	2.4025	2.4025	0.416233	1	1.55
	0.25	1	1	2.4025	1.55	1.55	2.4025	0.645161	0.645161	1.55
	0.25	1	1	0.416233	2.4025	1	2.4025	2.4025	0.645161	0.645161
	0.25	1	1	0.645161	2.4025	2.4025	2.4025	1	2.4025	2.4025
	0.25	1	1	0.645161	2.4025	1	1.55	0.645161	0.416233	1
	0.25	1	1	2.4025	1.55	0.645161	1.55	0.416233	1	1.55
	0.25	1	1	0.645161	0.645161	1.55	1.55	1	1	0.645161
	0.25	1	0	2.4025	1	0.645161	1.55	0.645161	1.55	0.645161
	0.25	1	1	1.55	1	2.4025	0.645161	1	0.645161	0.416233
	0.25	1	0	2.4025	1.55	2.4025	1	0.645161	0.645161	0.645161
	0.25	1	1	1	1.55	0.645161	2.4025	2.4025	1.55	0.645161
	0.25	1	1	0.416233	1.55	0.416233	2.4025	2.4025	0.645161	0.645161
	0.25	1	1	1.55	2.4025	0.416233	2.4025	1.55	0.416233	1
	0.25	1	1	1	0.645161	1	1.55	2.4025	1	1
	0.25	1	0	1.55	2.4025	1.55	1.55	1	2.4025	0.645161
	0.25	1	1	2.4025	2.4025	1	0.645161	0.416233	2.4025	2.4025
	0.25	1	1	0.645161	0.645161	1.55	1.55	1	0.416233	0.416233
	0.25	1	1	0.645161	0.645161	2.4025	0.416233	0.416233	2.4025	1.55
	0.25	1	1	1.55	1	1.55	1.55	1.55	2.4025	1
	0.25	1	1	1.55	1.55	1.55	0.416233	1	1.55	2.4025
	0.25	1	1	2.4025	2.4025	1	1	2.4025	1	1
	0.25	1	1	0.416233	1	0.645161	2.4025	0.416233	1	1
	0.25	1	0	0.645161	0.645161	1	1.55	2.4025	1.55	0.416233
	0.25	1	0	0.645161	0.416233	1.55	1.55	1.55	0.416233	0.645161
	0.25	1	1	1.55	1.55	0.416233	2.4025	2.4025	2.4025	0.645161
	0.25	1	1	0.416233	1.55	1.55	1.55	0.416233	2.4025	2.4025
	0.25	1	1	0.645161	0.645161	0.645161	0.416233	1.55	1.55	2.4025
	0.25	1	0	2.4025	1	2.4025	0.416233	0.416233	1.55	1.55
	0.25	1	1	0.416233	1.55	0.645161	1.55	1	1	0.416233
	0.25	1	1	0.416233	0.645161	2.4025	0.416233	1.55	1.55	2.4025
	0.25	1	1	0.645161	0.645161	0.645161	1.55	0.645161	2.4025	1.55
	0.25	1	0	1.55	0.645161	2.4025	0.416233	1.55	0.416233	1.55
	0.25	1	1	2.4025	2.4025	1.55	2.4025	1.55	1.55	1.55
	0.25	1	1	1	1.55	0.645161	1.55	1.55	0.645161	0.645161
	0.25	1	0	0.416233	0.416233	2.4025	1	1	0.416233	1
	0.25	1	1	2.4025	0.416233	2.4025	0.416233	0.416233	1	0.416233
	0.25	1	1	0.416233	2.4025	0.416233	2.4025	0.645161	2.4025	1
	0.25	1	1	2.4025	1.55	1	0.645161	1	2.4025	1.55
	0.25	1	1	0.416233	0.416233	1.55	0.416233	2.4025	0.645161	1.55
	0.25	1	0	1.55	0.645161	1	1.55	0.645161	2.4025	0.645161
	0.25	1	1	0.645161	2.4025	0.416233	0.416233	0.416233	0.416233	1.55
	0.25	1	1	0.416233	2.4025	0.416233	1	1	0.416233	2.4025
	0.25	1	1	0.645161	1	0.645161	1.55	1	1	1
	0.25	1	1	0.645161	0.645161	1	1	1	1	1.55
	0.25	1	1	1	1.55	0.416233	1	1	1	1.55
	0.25	1	1	0.645161	2.4025	1	2.4025	0.645161	0.645161	2.4025
	0.25	1	1	0.645161	1	1.55	1.55	0.416233	0.645161	2.4025
	0.25	1	0	1	1	0.645161	2.4025	2.4025	1	1.55
	0.25	1	1	0.645161	1.55	1.55	1	1.55	0.416233	0.416233
	0.25	1	1	2.4025	1.55	1	0.416233	0.645161	1	2.4025
	0.25	1	1	1	0.416233	1	0.645161	1	2.4025	1
	0.25	1	1	2.4025	1.55	1.55	0.645161	1.55	2.4025	2.4025
	0.25	1	1	1	1.55	1	2.4025	2.4025	1.55	2.4025
	0.25	1	1	2.4025	1.55	1.55	1.55	0.416233	0.416233	0.645161
	0.25	1	1	0.645161	0.645161	0.416233	1.55	1.55	0.416233	0.416233
	0.25	1	0	0.645161	1.55	0.645161	1.55	1	2.4025	1
	0.25	1	1	2.4025	1	1	1.55	1.55	2.4025	1
	0.25	1	0	1	1	1.55	2.4025	1	0.416233	2.4025
	0.25	1	1	1	0.416233	0.645161	1	2.4025	0.645161	0.645161
	0.25	1	1	1	2.4025	0.645161	2.4025	0.645161	0.645161	2.4025
	0.25	1	0	0.416233	2.4025	0.416233	0.645161	1.55	0.645161	0.645161
	0.25	1	1	0.645161	2.4025	1	0.645161	2.4025	0.416233	0.416233
	0.25	1	1	1.55	2.4025	1	2.4025	1.55	1.55	1.55
	0.25	1	1	1.55	0.416233	0.645161	0.416233	2.4025	0.645161	2.4025
	0.25	1	0	1.55	1	2.4025	0.645161	1	1	1
	0.25	1	1	0.645161	0.416233	1.55	1.55	1.55	0.645161	0.416233
	0.25	1	1	2.4025	2.4025	0.416233	1.55	0.645161	1	2.4025
	0.25	1	1	1.55	2.4025	0.645161	0.645161	0.645161	1	2.4025
	0.25	1	1	0.416233	0.416233	2.4025	0.416233	1.55	1	1
	0.25	1	1	2.4025	0.645161	0.416233	2.4025	1.55	2.4025	1
	0.25	1	1	1.55	1	1	1.55	1.55	2.4025	1
	0.25	1	1	1	0.645161	0.416233	0.645161	0.416233	1	0.645161
	0.25	1	0	1.55	0.416233	0.416233	0.416233	0.645161	0.416233	1.55
	0.25	1	1	0.416233	1.55	1	1.55	1.55	0.416233	1
	0.25	1	1	0.416233	1	2.4025	1.55	2.4025	1	0.416233
	0.25	1	0	1	0.645161	1	1.55	1	1.55	0.416233
	0.25	1	0	0.416233	0.645161	1.55	2.4025	0.416233	2.4025	2.4025
	0.25	1	1	0.416233	0.645161	1	0.416233	2.4025	0.416233	1.55
	0.25	1	1	1	0.416233	1.55	2.4025	0.645161	2.4025	1.55
	0.25	1	0	0.416233	0.645161	1	0.645161	1	2.4025	1.55
	0.25	1	1	1.55	0.416233	1.55	2.4025	1.55	2.4025	2.4025
	0.25	1	1	1	1	1	1.55	0.645161	1	0.645161
	0.25	1	1	1	1	1.55	1.55	2.4025	1.55	1.55
	0.25	1	0	0.645161	0.416233	1.55	0.645161	0.416233	2.4025	0.645161
	0.25	1	1	1	1	1	0.645161	1	2.4025	1
	0.25	1	1	2.4025	0.645161	1	2.4025	0.645161	1.55	0.645161
	0.25	1	1	1	1	1	0.416233	0.645161	1.55	1.55
	0.25	1	1	0.645161	0.416233	0.416233	0.645161	0.645161	1	2.4025
	0.25	1	0	1	1	2.4025	0.645161	1	0.416233	2.4025
	0.25	1	1	1.55	2.4025	0.416233	1	0.645161	1	1
	0.25	1	0	2.4025	1.55	1.55	0.416233	2.4025	2.4025	0.645161
	0.25	1	1	0.416233	0.416233	0.645161	1.55	1	2.4025	0.416233
	0.25	1	1	1	2.4025	0.645161	0.416233	1.55	1	1.55
	0.25	1	1	1	2.4025	0.416233	0.416233	0.645161	1	1
	0.25	1	0	0.416233	1.55	0.416233	0.645161	0.416233	0.645161	2.4025
	0.25	1	1	2.4025	2.4025	2.4025	2.4025	1.55	0.416233	2.4025
	0.25	1	1	1	1.55	2.4025	2.4025	1	0.416233	0.416233
	0.25	1	0	0.416233	1.55	0.416233	0.416233	0.416233	1	0.416233
	0.25	1	1	0.416233	2.4025	0.645161	0.416233	0.416233	1	1
	0.25	1	1	1	0.416233	1.55	1	0.645161	1.55	1.55
	0.25	1	1	2.4025	1.55	0.416233	2.4025	0.416233	0.416233	0.416233
	0.25	1	1	0.416233	1	1.55	1	1.55	2.4025	1.55
	0.25	1	1	0.645161	0.645161	1	1	2.4025	0.416233	2.4025
	0.25	1	0	0.645161	0.416233	2.4025	0.645161	1	2.4025	1.55
	0.25	1	0	1	0.416233	1	2.4025	1.55	1.55	2.4025
	0.25	1	1	0.645161	1	0.645161	0.416233	2.4025	1.55	0.645161
	0.25	1	1	0.645161	0.416233	0.416233	1.55	2.4025	0.645161	0.645161
	0.25	1	1	2.4025	0.416233	1	0.645161	2.4025	0.645161	2.4025
	0.25	1	1	0.416233	1	1.55	1	0.645161	1	1.55
	0.25	1	0	2.4025	1.55	0.416233	1	0.416233	2.4025	0.645161
	0.25	1	1	1.55	0.645161	0.645161	1	0.645161	2.4025	2.4025
	0.25	1	1	0.416233	1.55	1	1.55	0.645161	1.55	2.4025
	0.25	1	0	1.55	1	2.4025	0.645161	1	0.416233	0.416233
	0.25	1	0	1	1.55	0.645161	2.4025	1	0.645161	0.416233
	0.25	1	1	1.55	0.416233	0.416233	2.4025	0.645161	1.55	2.4025
	0.25	1	0	2.4025	0.645161	2.4025	0.416233	1.55	0.416233	1.55
	0.25	1	1	0.645161	0.645161	1	0.645161	0.416233	1.55	1
	0.25	1	1	1.55	1.55	1.55	2.4025	1	0.416233	0.416233
	0.25	1	1	1	1	2.4025	2.4025	2.4025	2.4025	1.55
	0.25	1	1	2.4025	0.645161	0.645161	1	1	2.4025	1.55
	0.25	1	1	2.4025	2.4025	1	2.4025	0.416233	2.4025	2.4025
	0.25	1	1	1	1	1.55	0.645161	2.4025	1	2.4025
	0.25	1	1	0.416233	0.416233	0.416233	1	0.645161	0.645161	1
	0.25	1	1	0.416233	0.416233	1	0.416233	1	2.4025	1.55
	0.25	1	1	1.55	0.645161	1	0.416233	1	0.416233	0.645161
	0.25	1	0	0.645161	0.645161	1.55	2.4025	0.416233	0.645161	0.645161
	0.25	1	1	0.645161	2.4025	2.4025	2.4025	1.55	2.4025	1
	0.25	1	1	0.416233	2.4025	0.645161	1	0.645161	2.4025	0.645161
	0.25	1	0	0.645161	0.645161	0.416233	0.416233	0.645161	1	1
	0.25	1	1	1	0.645161	1	0.416233	0.645161	0.416233	0.416233
	0.25	1	1	0.416233	1.55	0.416233	1.55	2.4025	0.416233	0.645161
	0.25	1	1	1.55	2.4025	0.645161	2.4025	0.416233	0.645161	0.645161
	0.25	1	1	2.4025	2.4025	2.4025	1	2.4025	0.645161	1
	0.25	1	1	1	0.645161	0.645161	2.4025	1	0.645161	0.645161
	0.25	1	1	0.416233	0.645161	2.4025	1	0.645161	2.4025	0.645161
	0.25	1	0	1	1	1.55	0.416233	2.4025	0.645161	0.416233
	0.25	1	0	0.645161	0.416233	1.55	1.55	0.416233	1	0.416233
	0.25	1	1	0.416233	0.645161	2.4025	0.645161	2.4025	2.4025	0.645161
	0.25	1	0	2.4025	0.416233	0.645161	1	1	0.645161	1.55
	0.25	1	1	2.4025	2.4025	1.55	1.55	2.4025	0.645161	0.645161
	0.25	1	0	1.55	0.416233	1.55	1	0.645161	1.55	1.55
	0.25	1	1	1.55	1.55	1	0.645161	0.416233	1	0.645161
	0.25	1	0	0.645161	0.645161	0.645161	1.55	0.645161	0.645161	0.645161
	0.25	1	1	1.55	1.55	2.4025	0.416233	1.55	0.645161	0.645161
	0.25	1	0	2.4025	2.4025	1	1	2.4025	0.416233	0.416233
	0.25	1	1	2.4025	0.645161	1	1	1	1	2.4025
	0.25	1	1	1	1	1	2.4025	1.55	2.4025	1.55
	0.25	1	0	0.645161	1.55	1.55	1	1.55	0.416233	1
	0.25	1	1	0.416233	0.416233	0.416233	0.416233	0.416233	1	0.416233
	0.25	1	0	0.416233	1.55	1.55	0.645161	0.416233	0.645161	1
	0.25	1	1	1	1.55	0.645161	0.645161	1.55	2.4025	0.416233
	0.25	1	1	0.416233	1.55	2.4025	0.416233	1	1	1
	0.25	1	1	0.645161	0.645161	0.645161	0.645161	1	0.416233	1
	0.25	1	1	1	0.645161	0.645161	1.55	1	1	2.4025
	0.25	1	1	0.416233	0.416233	1.55	0.645161	1	2.4025	2.4025
	0.25	1	1	0.416233	2.4025	0.645161	0.416233	2.4025	0.416233	1
	0.25	1	0	1.55	0.645161	2.4025	0.416233	0.645161	0.645161	2.4025
	0.25	1	0	0.645161	0.416233	0.645161	1.55	0.645161	1.55	1.55
	0.25	1	1	1	0.416233	0.645161	2.4025	1	2.4025	0.416233
	0.25	1	1	0.645161	1.55	0.416233	0.645161	0.416233	0.645161	0.416233
	0.25	1	0	1	2.4025	0.416233	1.55	2.4025	0.645161	1
	0.25	1	1	0.416233	2.4025	2.4025	1	1.55	2.4025	1
	0.25	1	1	0.645161	0.416233	0.416233	0.645161	1.55	0.416233	1
	0.25	1	0	0.416233	1.55	0.416233	0.645161	1.55	2.4025	0.645161
	0.25	1	1	1	0.645161	0.645161	0.645161	0.645161	0.416233	2.4025
	0.25	1	0	0.416233	1.55	0.416233	0.416233	0.416233	1	2.4025
	0.25	1	1	0.645161	2.4025	2.4025	1	2.4025	1.55	2.4025
	0.25	1	1	0.645161	0.645161	0.645161	0.416233	1.55	0.416233	0.645161
	0.25	1	1	0.416233	1.55	0.416233	2.4025	0.416233	0.416233	0.416233
	0.25	1	1	0.416233	0.416233	1.55	1.55	0.416233	0.645161	1.55
	0.25	1	0	2.4025	0.416233	1.55	2.4025	0.645161	2.4025	1
	0.25	1	1	2.4025	1.55	0.645161	1.55	0.416233	2.4025	0.416233
	0.25	1	0	1.55	0.416233	1.55	1	2.4025	2.4025	0.416233
	0.25	1	0	1	1	1	0.416233	1.55	1	2.4025
	0.25	1	1	0.645161	1.55	2.4025	0.416233	0.416233	1	0.645161
	0.25	1	1	2.4025	2.4025	1	0.416233	1.55	1	2.4025
	0.25	1	0	0.645161	1.55	0.416233	2.4025	1.55	1.55	0.416233
	0.25	1	1	1.55	0.416233	2.4025	0.416233	0.416233	1.55	2.4025
	0.25	1	1	0.416233	0.645161	1	2.4025	0.645161	1	0.416233
	0.25	1	1	0.416233	2.4025	0.416233	1.55	0.416233	1.55	1.55
	0.25	1	1	0.416233	1	0.416233	1	1	2.4025	1
	0.25	1	0	2.4025	0.645161	1.55	2.4025	0.416233	1.55	1.55
	0.25	1	1	1.55	1.55	1	1	1.55	2.4025	1.55
	0.25	1	0	0.645161	2.4025	2.4025	1	1.55	0.645161	0.416233
	0.25	1	1	0.645161	1.55	0.416233	1	2.4025	2.4025	2.4025
	0.25	1	1	1	0.645161	1.55	1	1.55	0.645161	0.645161
	0.25	1	1	1.55	0.416233	1	2.4025	0.416233	0.416233	1.55
	0.25	1	1	0.416233	1.55	1	1	0.645161	0.416233	2.4025
	0.25	1	1	2.4025	0.416233	0.645161	0.416233	2.4025	0.416233	2.4025
	0.25	1	1	1.55	0.645161	0.645161	1.55	2.4025	0.416233	1.55
	0.25	1	1	2.4025	1.55	1	0.645161	0.416233	1.55	1.55
	0.25	1	1	1	0.416233	2.4025	1.55	1	2.4025	0.416233
	0.25	1	1	1	0.416233	0.645161	2.4025	2.4025	1.55	0.416233
	0.25	1	0	2.4025	1.55	0.416233	0.416233	1.55	0.416233	1.55
	0.25	1	0	1	2.4025	0.645161	2.4025	2.4025	0.416233	2.4025
	0.25	1	1	2.4025	0.645161	1	2.4025	0.645161	1	0.416233
	0.25	1	0	1.55	1	0.416233	0.416233	0.416233	1	1
	0.25	1	1	0.416233	1.55	1.55	2.4025	2.4025	2.4025	0.416233
	0.25	1	0	1	1	1	2.4025	0.645161	0.645161	0.645161
	0.25	1	1	2.4025	2.4025	0.416233	2.4025	2.4025	0.645161	1
	0.25	1	0	0.645161	0.645161	0.416233	0.416233	0.645161	2.4025	0.416233
	0.25	1	0	1	0.416233	2.4025	0.416233	0.416233	0.416233	1.55
	0.25	1	0	2.4025	1	0.416233	0.416233	1	0.416233	0.416233
	0.25	1	1	1	2.4025	0.416233	1.55	1	1	0.645161
	0.25	1	1	0.645161	2.4025	1	0.645161	2.4025	1	0.645161
	0.25	1	1	0.416233	1	0.645161	1.55	1	1	0.645161
	0.25	1	1	2.4025	1	2.4025	1.55	1.55	0.416233	1
	0.25	1	1	1	1.55	2.4025	1	2.4025	2.4025	0.645161
	0.25	1	1	1.55	0.416233	2.4025	0.645161	1	2.4025	1.55
	0.25	1	1	1	0.645161	1	1	1	2.4025	0.416233
	0.25	1	1	1.55	1	2.4025	0.645161	0.645161	1.55	1.55
	0.25	1	1	2.4025	1.55	2.4025	1.55	1	0.416233	2.4025
	0.25	1	1	1.55	1	1	1.55	0.645161	1	2.4025
	0.25	1	1	0.416233	1	1.55	2.4025	1	0.416233	1
	0.25	1	1	1	0.645161	0.645161	0.416233	0.416233	2.4025	2.4025
	0.25	1	0	2.4025	0.416233	2.4025	2.4025	0.416233	2.4025	1
	0.25	1	1	1	0.416233	0.416233	0.645161	0.645161	2.4025	1
	0.25	1	1	2.4025	0.645161	0.416233	1.55	0.645161	0.645161	0.645161
	0.25	1	1	2.4025	0.416233	0.416233	0.645161	1	1.55	2.4025
	0.25	1	1	0.416233	0.416233	0.645161	2.4025	2.4025	0.645161	1.55
	0.25	1	1	1.55	1	2.4025	0.645161	1	0.645161	0.645161
	0.25	1	1	2.4025	0.416233	1	0.416233	2.4025	0.645161	0.645161
	0.25	1	1	1	1.55	2.4025	2.4025	0.645161	1	1
	0.25	1	0	2.4025	0.416233	1.55	1	1	0.645161	2.4025
	0.25	1	1	1	1	0.645161	1	0.416233	1.55	0.645161
	0.25	1	0	2.4025	1	0.645161	1.55	2.4025	0.416233	0.645161
	0.25	1	0	1.55	1	0.416233	1.55	0.416233	1.55	2.4025
	0.25	1	0	1.55	2.4025	2.4025	1.55	1	0.645161	1
	0.25	1	0	1	1.55	1.55	1.55	0.416233	2.4025	0.645161
	0.25	1	1	1	2.4025	2.4025	1.55	1.55	2.4025	2.4025
	0.25	1	1	1	1	0.645161	0.416233	1	1	1.55
	0.25	1	0	2.4025	0.645161	1	0.645161	2.4025	1	1.55
	0.25	1	1	2.4025	1.55	1	1	2.4025	2.4025	1.55
	0.25	1	1	1.55	1.55	2.4025	0.416233	0.416233	0.416233	2.4025
	0.25	1	1	1.55	0.416233	1.55	0.416233	0.416233	1.55	0.416233
	0.25	1	0	0.416233	1	1	0.416233	0.416233	1	1
	0.25	1	0	0.645161	1	0.416233	0.416233	1	0.416233	0.416233
	0.25	1	1	1	1	0.416233	1.55	0.645161	1	0.416233
	0.25	1	1	0.645161	0.416233	2.4025	0.416233	1	0.416233	0.416233
	0.25	1	0	0.645161	2.4025	1	0.416233	1	1	2.4025
	0.25	1	0	2.4025	0.645161	1.55	0.645161	1.55	0.645161	1
	0.25	1	1	1	1.55	1.55	1.55	0.645161	1	1
	0.25	1	0	1.55	1.55	0.645161	0.645161	1.55	0.645161	0.645161
	0.25	1	1	0.416233	2.4025	0.645161	1	2.4025	2.4025	1.55
	0.25	1	1	2.4025	1	0.645161	0.645161	2.4025	0.645161	0.416233
	0.25	1	0	2.4025	0.416233	1.55	1.55	1	1	2.4025
	0.25	1	1	1.55	0.416233	0.416233	0.416233	0.645161	2.4025	2.4025
	0.25	1	1	1	1.55	1.55	2.4025	0.645161	1	1.55
	0.25	1	1	2.4025	1	0.416233	0.645161	0.645161	0.416233	1
	0.25	1	0	1	2.4025	0.645161	0.416233	0.416233	0.416233	0.416233
	0.25	1	0	1	2.4025	0.416233	2.4025	0.645161	0.416233	1
	0.25	1	0	1.55	1	1.55	0.416233	1.55	2.4025	0.645161
	0.25	1	0	2.4025	0.416233	0.416233	1.55	0.645161	0.645161	0.645161
	0.25	1	1	2.4025	0.416233	1	1	1.55	0.416233	1
	0.25	1	0	2.4025	2.4025	2.4025	1	1.55	1	1.55
	0.25	1	1	1.55	0.416233	2.4025	0.416233	1	2.4025	2.4025
	0.25	1	1	2.4025	1	1	2.4025	0.416233	1	2.4025
	0.25	1	1	0.645161	0.416233	2.4025	2.4025	1.55	1	0.645161
	0.25	1	0	1	1	1	2.4025	1	1.55	0.416233
	0.25	1	0	1	1.55	0.645161	1	1.55	0.645161	1.55
	0.25	1	1	1	0.645161	0.416233	2.4025	0.416233	1	2.4025
	0.25	1	1	1	1	1	2.4025	1.55	1.55	1.55
	0.25	1	1	0.645161	2.4025	1	0.416233	2.4025	1.55	2.4025
	0.25	1	1	0.645161	1.55	1.55	1.55	1	0.645161	1
	0.25	1	1	2.4025	0.645161	0.645161	1	0.645161	1.55	2.4025
	0.25	1	1	0.645161	1	0.645161	1.55	1	1	1
	0.25	1	1	1	2.4025	2.4025	0.416233	2.4025	0.645161	1.55
	0.25	1	1	1.55	0.416233	1	2.4025	0.645161	2.4025	1
	0.25	1	0	1	0.416233	2.4025	1.55	1	1.55	2.4025
	0.25	1	1	0.645161	0.645161	0.645161	2.4025	0.645161	0.416233	2.4025
	0.25	1	1	0.645161	0.645161	1.55	2.4025	0.416233	0.416233	2.4025
	0.25	1	1	0.645161	2.4025	2.4025	0.416233	0.416233	0.416233	2.4025
	0.25	1	1	1.55	0.645161	1	1	1	0.645161	2.4025
	0.25	1	0	0.416233	1	0.416233	0.416233	0.416233	1	0.416233
	0.25	1	0	1	1	0.416233	0.645161	0.645161	1	1
	0.25	1	1	1	2.4025	0.416233	1	0.416233	1	1
	0.25	1	0	1.55	1.55	1	0.416233	0.645161	1.55	1.55
	0.25	1	0	0.416233	0.645161	0.645161	2.4025	1.55	0.416233	0.645161
	0.25	1	1	0.645161	1.55	0.416233	1.55	1.55	1.55	1
	0.25	1	1	0.416233	1.55	2.4025	0.416233	0.645161	2.4025	0.416233
	0.25	1	1	0.645161	1	2.4025	0.645161	0.416233	2.4025	1.55
	0.25	1	1	1.55	1.55	1.55	0.645161	1	2.4025	0.416233
	0.25	1	0	0.416233	1.55	0.645161	1	0.645161	0.645161	0.416233
	0.25	1	1	1.55	0.416233	0.645161	1	1.55	2.4025	1
	0.25	1	0	0.645161	0.645161	0.645161	0.416233	0.416233	2.4025	1
	0.25	1	1	2.4025	0.645161	0.416233	0.645161	1.55	2.4025	1
	0.25	1	1	2.4025	2.4025	1.55	2.4025	2.4025	0.645161	2.4025
	0.25	1	1	0.645161	0.645161	1	1	0.645161	1	2.4025
	0.25	1	0	1.55	1.55	0.645161	0.416233	0.645161	0.416233	1.55
	0.25	1	1	0.645161	1.55	1.55	1	0.645161	2.4025	1
	0.25	1	0	2.4025	0.416233	0.645161	0.645161	0.416233	2.4025	2.4025
	0.25	1	0	0.645161	0.645161	0.416233	0.416233	1	0.416233	1
	0.25	1	1	0.645161	2.4025	1	1	0.416233	2.4025	0.645161
	0.25	1	1	1.55	1.55	2.4025	0.645161	2.4025	1	0.645161
	0.25	1	0	0.645161	0.416233	1.55	0.416233	0.416233	0.645161	1.55
	0.25	1	1	0.645161	2.4025	2.4025	2.4025	0.416233	0.416233	0.416233
	0.25	1	0	2.4025	1.55	1.55	0.416233	0.416233	2.4025	0.416233
	0.25	1	0	2.4025	1	0.645161	1	1.55	2.4025	2.4025
	0.25	1	1	0.416233	1.55	1.55	0.416233	1.55	0.416233	2.4025
	0.25	1	1	1	1.55	1.55	2.4025	1	0.416233	1
	0.25	1	0	1	0.416233	0.645161	1.55	2.4025	2.4025	1
	0.25	1	0	0.645161	0.645161	2.4025	0.645161	2.4025	1.55	1
	0.25	1	0	1.55	2.4025	2.4025	1	0.645161	1	0.416233
	0.25	1	0	0.416233	0.645161	0.645161	0.416233	2.4025	2.4025	1
	0.25	1	1	2.4025	0.645161	0.645161	0.416233	0.645161	0.645161	0.416233
	0.25	1	1	1.55	2.4025	0.645161	1.55	1.55	0.416233	0.645161
	0.25	1	1	2.4025	1	0.416233	1.55	0.416233	0.416233	1
	0.25	1	1	0.416233	1	2.4025	1.55	1	1	1.55
	0.25	1	1	0.645161	1.55	2.4025	1.55	0.645161	0.645161	1
	0.25	1	1	0.645161	0.645161	2.4025	0.416233	0.645161	0.416233	1.55
	0.25	1	1	1.55	0.645161	0.416233	0.645161	1.55	1	2.4025
	0.25	1	0	0.416233	2.4025	1.55	0.416233	0.416233	1.55	0.645161
	0.25	1	1	0.645161	1.55	0.416233	2.4025	0.416233	0.645161	2.4025
	0.25	1	1	2.4025	1.55	1.55	0.416233	0.645161	2.4025	2.4025
	0.25	1	1	0.416233	1.55	2.4025	1	2.4025	1.55	0.645161
	0.25	1	1	0.645161	2.4025	0.416233	1	1.55	0.645161	0.645161
	0.25	1	1	1	0.645161	1.55	2.4025	1	0.645161	2.4025
	0.25	1	0	0.416233	1.55	1.55	1	1.55	0.645161	0.416233
	0.25	1	1	0.645161	0.416233	0.645161	1	2.4025	2.4025	0.645161
	0.25	1	1	0.645161	1	0.416233	2.4025	0.645161	1	1
	0.25	1	0	0.645161	0.416233	0.416233	2.4025	0.416233	1	0.645161
	0.25	1	0	1.55	0.416233	0.416233	0.645161	0.645161	2.4025	1.55
	0.25	1	1	0.416233	1	1.55	2.4025	0.645161	2.4025	1.55
	0.25	2	1	2.4025	2.4025	1	0.645161	2.4025	0.416233	2.4025
	0.25	2	1	0.416233	0.416233	2.4025	2.4025	2.4025	1	1
	0.25	2	1	0.416233	2.4025	0.416233	1.55	2.4025	1	2.4025
	0.25	2	0	0.416233	1	2.4025	1.55	0.416233	1.55	0.645161
	0.25	2	1	0.645161	0.645161	1.55	1.55	0.416233	1.55	2.4025
	0.25	2	0	2.4025	1	1.55	1	1.55	0.645161	1.55
	0.25	2	1	0.416233	2.4025	1	0.645161	0.416233	0.416233	2.4025
	0.25	2	1	1	2.4025	0.645161	0.645161	1	1	0.416233
	0.25	2	0	0.416233	1	0.645161	2.4025	0.645161	1	1
	0.25	2	1	0.645161	0.645161	1	0.416233	1.55	1.55	0.416233
	0.25	2	1	0.416233	0.645161	0.416233	0.416233	0.416233	1	1
	0.25	2	1	0.416233	1.55	1	0.645161	0.416233	2.4025	1.55
	0.25	2	1	0.645161	1	1.55	1	2.4025	0.416233	1.55
	0.25	2	1	1	0.645161	0.416233	1.55	1.55	0.645161	0.645161
	0.25	2	1	0.416233	1	0.416233	0.645161	2.4025	1.55	0.645161
	0.25	2	0	0.645161	2.4025	2.4025	0.416233	1.55	1	0.645161
	0.25	2	1	0.416233	0.416233	2.4025	0.645161	0.645161	2.4025	1
	0.25	2	1	1	1.55	0.645161	0.416233	0.645161	2.4025	0.645161
	0.25	2	1	0.416233	2.4025	2.4025	0.645161	0.645161	0.416233	0.645161
	0.25	2	0	1.55	1	1.55	0.416233	0.416233	0.416233	1.55
	0.25	2	0	1	1	0.416233	1.55	1.55	0.416233	1
	0.25	2	1	1	1	0.416233	0.416233	2.4025	1	2.4025
	0.25	2	1	0.645161	1.55	2.4025	0.416233	0.645161	1	0.645161
	0.25	2	1	2.4025	0.416233	0.645161	0.416233	0.645161	1	2.4025
	0.25	2	1	0.416233	2.4025	2.4025	2.4025	2.4025	1.55	1
	0.25	2	0	0.645161	2.4025	1.55	1	1	1	0.416233
	0.25	2	0	1	0.416233	1.55	0.645161	2.4025	0.645161	0.645161
	0.25	2	1	1	2.4025	1.55	1.55	1.55	0.416233	1.55
	0.25	2	1	2.4025	0.645161	1.55	1.55	1.55	1.55	1.55
	0.25	2	1	1	1	2.4025	1.55	0.645161	1.55	1
	0.25	2	1	1.55	0.416233	0.416233	1	1.55	1.55	1.55
	0.25	2	0	1.55	0.416233	0.645161	1	1	1	1
	0.25	2	1	2.4025	1	0.416233	1	1.55	1.55	1
	0.25	2	0	2.4025	1.55	0.645161	0.645161	0.645161	1.55	0.645161
	0.25	2	1	0.416233	0.645161	0.645161	0.416233	2.4025	1	1.55
	0.25	2	1	0.645161	1.55	2.4025	2.4025	2.4025	1.55	0.416233
	0.25	2	0	0.416233	0.416233	0.416233	0.645161	1.55	0.416233	1.55
	0.25	2	0	0.416233	0.416233	2.4025	0.645161	0.416233	1	0.416233
	0.25	2	1	1.55	2.4025	1.55	2.4025	0.645161	1	0.416233
	0.25	2	1	1.55	2.4025	1	2.4025	0.645161	0.645161	0.645161
	0.25	2	1	0.416233	0.645161	2.4025	0.645161	0.416233	2.4025	1.55
	0.25	2	1	1.55	1	1.55	2.4025	1.55	1	2.4025
	0.25	2	1	2.4025	2.4025	0.645161	1	0.645161	1	1.55
	0.25	2	0	1.55	1.55	2.4025	0.416233	0.416233	1.55	1
	0.25	2	0	0.645161	0.645161	1	1	1.55	1.55	0.645161
	0.25	2	1	0.645161	0.416233	1.55	0.645161	2.4025	1.55	0.645161
	0.25	2	1	2.4025	2.4025	0.645161	0.416233	1	0.645161	1
	0.25	2	1	1.55	2.4025	0.645161	0.645161	1.55	1.55	1.55
	0.25	2	0	0.645161	0.416233	0.645161	1	0.645161	0.416233	1
	0.25	2	1	2.4025	2.4025	1.55	0.416233	1	1.55	2.4025
	0.25	2	1	2.4025	0.645161	1.55	2.4025	0.645161	0.416233	2.4025
	0.25	2	0	0.416233	0.645161	0.416233	1	0.416233	0.645161	1
	0.25	2	1	1.55	0.645161	1	1.55	0.645161	1	0.645161
	0.25	2	0	1.55	2.4025	1.55	0.416233	1.55	0.416233	0.645161
	0.25	2	0	0.645161	1.55	1	0.645161	2.4025	0.645161	0.416233
	0.25	2	0	0.645161	1	0.416233	1	1	0.645161	1.55
	0.25	2	1	1.55	1.55	0.416233	2.4025	1.55	0.416233	0.645161
	0.25	2	0	2.4025	2.4025	0.645161	0.645161	0.645161	2.4025	1.55
	0.25	2	1	2.4025	2.4025	2.4025	2.4025	2.4025	0.416233	0.645161
	0.25	2	0	1.55	0.416233	0.416233	2.4025	0.416233	0.416233	2.4025
	0.25	2	1	2.4025	2.4025	1.55	2.4025	0.645161	1.55	0.416233
	0.25	2	0	1	0.416233	1.55	0.645161	1.55	1.55	0.416233
	0.25	2	0	0.645161	1	0.416233	0.645161	0.645161	0.416233	0.416233
	0.25	2	1	2.4025	1.55	1	2.4025	0.416233	2.4025	2.4025
	0.25	2	1	0.645161	0.416233	1	2.4025	0.416233	1.55	1
	0.25	2	1	2.4025	2.4025	1	0.645161	2.4025	1	1.55
	0.25	2	0	1.55	0.416233	0.416233	0.416233	1.55	1	0.645161
	0.25	2	1	2.4025	2.4025	2.4025	2.4025	1	2.4025	0.416233
	0.25	2	1	1	1.55	0.645161	0.416233	2.4025	0.645161	1
	0.25	2	1	2.4025	1	0.416233	2.4025	1	1	0.645161
	0.25	2	1	0.416233	2.4025	0.416233	0.645161	0.416233	0.645161	2.4025
	0.25	2	1	0.416233	2.4025	1	1.55	2.4025	0.645161	2.4025
	0.25	2	1	1	1	2.4025	1.55	0.416233	2.4025	2.4025
	0.25	2	0	1	1.55	1.55	2.4025	1.55	1	0.645161
	0.25	2	0	1.55	0.645161	2.4025	2.4025	1	0.645161	1.55
	0.25	2	1	2.4025	0.645161	0.645161	1.55	1	2.4025	2.4025
	0.25	2	0	2.4025	1	1.55	0.416233	0.645161	0.645161	0.645161
	0.25	2	1	0.416233	0.416233	1.55	0.645161	0.645161	0.416233	2.4025
	0.25	2	1	0.416233	0.645161	1.55	1.55	1.55	2.4025	1
	0.25	2	1	0.416233	0.645161	1.55	0.645161	2.4025	1.55	2.4025
	0.25	2	1	1	1	2.4025	2.4025	1.55	0.645161	0.416233
	0.25	2	1	1	0.645161	1.55	2.4025	1.55	2.4025	0.416233
	0.25	2	1	0.416233	1.55	2.4025	1.55	1.55	1.55	1.55
	0.25	2	1	1.55	2.4025	1.55	1	2.4025	0.416233	0.645161
	0.25	2	1	1.55	0.416233	0.645161	0.645161	0.645161	1.55	1
	0.25	2	1	0.416233	1	2.4025	1.55	0.416233	0.645161	2.4025
	0.25	2	0	1	0.645161	1	1.55	1	1	2.4025
	0.25	2	1	0.416233	0.645161	1.55	2.4025	0.416233	0.645161	1.55
	0.25	2	0	1	1	0.416233	1	0.645161	0.645161	0.416233
	0.25	2	1	2.4025	0.416233	2.4025	1	1.55	1.55	2.4025
	0.25	2	1	1	2.4025	1	2.4025	1	1.55	1
	0.25	2	0	0.416233	0.416233	1.55	0.416233	1	0.645161	0.416233
	0.25	2	0	0.645161	2.4025	0.645161	1.55	1	0.645161	0.416233
	0.25	2	1	0.645161	2.4025	0.645161	0.416233	1	1	0.645161
	0.25	2	0	2.4025	1	2.4025	1.55	0.645161	1.55	0.416233
	0.25	2	0	1.55	0.416233	1	1.55	0.645161	0.416233	2.4025
	0.25	2	0	1	1.55	1	2.4025	0.416233	1.55	0.416233
	0.25	2	0	0.645161	1	0.416233	0.645161	1	2.4025	2.4025
	0.25	2	0	0.416233	0.416233	0.416233	1	0.416233	0.645161	0.416233
	0.25	2	0	1	0.645161	1	2.4025	1.55	0.645161	0.416233
	0.25	2	1	0.645161	0.416233	1	2.4025	0.416233	0.416233	0.645161
	0.25	2	1	1	2.4025	0.645161	2.4025	1	1.55	0.416233
	0.25	2	1	2.4025	2.4025	2.4025	0.645161	2.4025	1.55	1.55
	0.25	2	0	1	1	1	0.416233	1.55	1.55	1.55
	0.25	2	1	0.416233	2.4025	1	1	2.4025	1.55	0.416233
	0.25	2	1	1.55	1	0.645161	0.416233	1	0.416233	2.4025
	0.25	2	0	2.4025	0.416233	0.645161	1	0.645161	2.4025	1
	0.25	2	0	1	0.645161	1.55	0.645161	1.55	1	0.416233
	0.25	2	1	1	0.416233	2.4025	1	0.645161	0.645161	0.645161
	0.25	2	0	1.55	2.4025	1	0.416233	1	1	1.55
	0.25	2	1	2.4025	2.4025	0.645161	2.4025	0.645161	1.55	0.645161
	0.25	2	0	1	1	1	1	2.4025	0.645161	0.416233
	0.25	2	0	2.4025	1.55	1.55	1	0.645161	0.645161	1.55
	0.25	2	1	0.645161	2.4025	0.416233	1.55	2.4025	0.645161	1
	0.25	2	1	0.645161	1.55	0.645161	1	2.4025	2.4025	0.645161
	0.25	2	1	0.645161	1	1	0.416233	0.645161	2.4025	0.416233
	0.25	2	1	1	0.416233	0.416233	2.4025	0.416233	1.55	1.55
	0.25	2	1	0.645161	0.416233	0.645161	2.4025	0.645161	2.4025	0.645161
	0.25	2	0	2.4025	0.645161	1	2.4025	0.645161	2.4025	0.416233
	0.25	2	1	2.4025	0.645161	0.645161	0.645161	0.645161	0.645161	0.416233
	0.25	2	0	1.55	0.416233	2.4025	1	1	1	0.645161
	0.25	2	0	1.55	0.416233	0.645161	0.416233	1.55	0.645161	1.55
	0.25	2	1	2.4025	1	1.55	2.4025	0.645161	1	1
	0.25	2	1	0.645161	1	1	1	1	1.55	1
	0.25	2	1	1	1.55	0.416233	0.645161	0.416233	0.416233	0.416233
	0.25	2	1	1.55	1	1	2.4025	1.55	1	2.4025
	0.25	2	1	0.645161	0.645161	0.645161	1.55	0.416233	2.4025	1.55
	0.25	2	1	2.4025	2.4025	1.55	1	1	1	2.4025
	0.25	2	1	2.4025	0.416233	1.55	2.4025	0.645161	2.4025	0.416233
	0.25	2	1	0.416233	0.645161	0.645161	1	0.645161	1	1.55
	0.25	2	0	0.645161	0.645161	0.416233	1.55	0.645161	0.416233	0.416233
	0.25	2	1	1	2.4025	1	1.55	0.416233	1	2.4025
	0.25	2	0	2.4025	1.55	2.4025	1	2.4025	0.416233	0.645161
	0.25	2	1	2.4025	2.4025	0.416233	1	0.416233	1.55	0.645161
	0.25	2	1	1.55	0.416233	1	0.416233	1.55	0.645161	1.55
	0.25	2	0	1	1	2.4025	1.55	1	0.416233	1.55
	0.25	2	1	0.645161	0.645161	1.55	0.416233	1.55	2.4025	0.645161
	0.25	2	0	1	0.645161	1.55	1	1	0.645161	1.55
	0.25	2	1	1	0.416233	0.416233	1.55	2.4025	0.645161	0.416233
	0.25	2	0	0.645161	1	0.645161	1.55	1.55	0.416233	2.4025
	0.25	2	1	0.645161	0.645161	1	1	1	1	0.645161
	0.25	2	0	0.416233	1.55	0.645161	0.416233	0.645161	0.416233	0.416233
	0.25	2	1	2.4025	1.55	0.645161	2.4025	1.55	2.4025	0.416233
	0.25	2	1	0.645161	1	1	0.416233	0.416233	1.55	0.645161
	0.25	2	1	1	1	0.645161	0.645161	1	1.55	2.4025
	0.25	2	1	0.645161	0.645161	0.416233	1.55	0.645161	1.55	0.416233
	0.25	2	1	0.416233	1	0.645161	0.416233	1.55	0.416233	1
	0.25	2	0	0.416233	0.645161	2.4025	0.416233	0.645161	2.4025	0.416233
	0.25	2	0	0.645161	0.645161	0.645161	1	0.416233	1	0.645161
	0.25	2	0	1.55	0.416233	2.4025	1.55	2.4025	2.4025	0.645161
	0.25	2	0	1	1	0.645161	1.55	0.416233	2.4025	1.55
	0.25	2	1	1	2.4025	0.645161	0.416233	0.645161	2.4025	2.4025
	0.25	2	1	1.55	2.4025	2.4025	0.416233	0.645161	0.416233	1.55
	0.25	2	1	0.645161	0.416233	0.416233	0.645161	2.4025	2.4025	2.4025
	0.25	2	0	1.55	1	0.645161	1.55	1	1.55	0.416233
	0.25	2	1	0.416233	0.645161	1	0.645161	2.4025	1.55	2.4025
	0.25	2	0	1	1.55	0.416233	0.416233	0.416233	2.4025	2.4025
	0.25	2	1	1.55	1	1.55	2.4025	2.4025	1.55	0.416233
	0.25	2	0	2.4025	2.4025	2.4025	0.416233	0.416233	1.55	1.55
	0.25	2	1	1.55	0.416233	1	1.55	2.4025	1.55	1.55
	0.25	2	1	0.416233	0.645161	2.4025	0.645161	2.4025	1	0.645161
	0.25	2	1	0.645161	1	1	0.645161	0.645161	0.645161	0.645161
	0.25	2	1	1.55	2.4025	1.55	2.4025	1	1	1
	0.25	2	1	0.416233	1.55	2.4025	0.645161	1.55	1.55	1.55
	0.25	2	1	1	1.55	1.55	1.55	1.55	0.645161	1.55
	0.25	2	1	1.55	2.4025	0.645161	0.645161	0.416233	1	2.4025
	0.25	2	1	1	1.55	2.4025	1.55	1.55	1	1.55
	0.25	2	0	1.55	1.55	0.645161	1	0.645161	2.4025	1.55
	0.25	2	1	1.55	2.4025	0.645161	0.416233	2.4025	0.416233	0.416233
	0.25	2	0	1.55	1.55	0.416233	1	0.645161	1.55	2.4025
	0.25	2	0	0.645161	1	0.645161	1	2.4025	0.645161	0.645161
	0.25	2	0	2.4025	1	1	0.645161	0.416233	2.4025	0.645161
	0.25	2	1	0.416233	0.416233	1	1.55	0.416233	2.4025	1.55
	0.25	2	1	0.416233	1	2.4025	1	0.416233	0.645161	2.4025
	0.25	2	1	2.4025	2.4025	0.416233	1.55	2.4025	2.4025	2.4025
	0.25	2	1	0.416233	0.645161	1	1.55	0.645161	0.416233	0.645161
	0.25	2	1	1.55	2.4025	1.55	0.416233	0.645161	0.645161	1.55
	0.25	2	1	0.416233	1.55	1.55	1	1	1	1.55
	0.25	2	0	2.4025	1	0.416233	1.55	1	0.416233	2.4025
	0.25	2	0	0.645161	1	1	0.645161	1.55	0.645161	1
	0.25	2	0	1	0.416233	1	0.645161	1	1	2.4025
	0.25	2	0	2.4025	0.416233	1	2.4025	0.416233	1.55	1.55
	0.25	2	1	1	0.645161	2.4025	1	1	0.645161	0.645161
	0.25	2	1	1.55	0.645161	2.4025	1	2.4025	0.416233	2.4025
	0.25	2	0	1	1.55	2.4025	1.55	0.416233	0.645161	1
	0.25	2	1	0.645161	0.645161	1.55	0.645161	1	1.55	0.645161
	0.25	2	0	2.4025	1	0.416233	0.416233	0.416233	0.645161	1
	0.25	2	1	0.645161	0.645161	2.4025	1.55	1	0.416233	2.4025
	0.25	2	1	2.4025	2.4025	2.4025	0.416233	1	2.4025	1
	0.25	2	0	0.416233	0.645161	0.645161	1.55	0.416233	1	2.4025
	0.25	2	1	0.416233	0.416233	1.55	0.645161	2.4025	0.645161	2.4025
	0.25	2	1	0.645161	1	2.4025	0.645161	0.645161	1.55	0.645161
	0.25	2	0	0.645161	1	2.4025	0.645161	0.416233	1.55	2.4025
	0.25	2	1	2.4025	2.4025	1	0.416233	1	0.416233	0.645161
	0.25	2	1	0.416233	1.55	2.4025	2.4025	0.416233	2.4025	0.416233
	0.25	2	0	0.645161	1.55	1.55	0.645161	2.4025	2.4025	2.4025
	0.25	2	1	2.4025	1	1.55	0.416233	1.55	0.645161	1.55
	0.25	2	1	1	0.645161	1	2.4025	1	1.55	0.645161
	0.25	2	1	0.416233	0.645161	1	1.55	0.416233	0.645161	2.4025
	0.25	2	1	1	2.4025	0.645161	0.416233	1.55	1.55	0.416233
	0.25	2	1	1	2.4025	1.55	0.645161	0.645161	2.4025	1
	0.25	2	0	1.55	2.4025	0.416233	0.645161	0.645161	1	0.645161
	0.25	2	0	0.645161	1	0.416233	0.416233	0.645161	0.645161	2.4025
	0.25	2	1	1.55	1	2.4025	0.416233	1	0.416233	0.645161
	0.25	2	1	0.645161	2.4025	1	2.4025	1	2.4025	1.55
	0.25	2	1	2.4025	1	2.4025	1	1.55	1	0.416233
	0.25	2	1	2.4025	1.55	0.645161	2.4025	1.55	0.645161	0.416233
	0.25	2	1	0.645161	0.416233	2.4025	0.645161	0.645161	2.4025	2.4025
	0.25	2	0	1.55	1	0.416233	1	1.55	0.645161	1.55
	0.25	2	1	2.4025	0.416233	1.55	1.55	2.4025	0.645161	0.416233
	0.25	2	1	0.416233	1	1	1.55	1.55	2.4025	0.416233
	0.25	2	0	0.416233	0.645161	0.416233	1	2.4025	1.55	0.416233
	0.25	2	0	1.55	0.416233	0.645161	1.55	2.4025	0.416233	0.645161
	0.25	2	0	1	0.645161	0.416233	2.4025	2.4025	2.4025	1
	0.25	2	1	1.55	0.416233	2.4025	2.4025	2.4025	0.416233	2.4025
	0.25	2	1	2.4025	1.55	2.4025	1.55	1.55	0.645161	0.416233
	0.25	2	1	2.4025	1.55	0.416233	1.55	0.416233	1.55	2.4025
	0.25	2	1	2.4025	0.645161	2.4025	0.645161	0.416233	2.4025	2.4025
	0.25	2	1	0.645161	1	1	2.4025	2.4025	1.55	1
	0.25	2	0	1	1	1.55	0.645161	0.416233	2.4025	1.55
	0.25	2	1	1.55	0.645161	2.4025	1.55	0.645161	0.645161	1
	0.25	2	1	1.55	0.416233	1	1.55	1	0.645161	2.4025
	0.25	2	0	0.645161	0.645161	0.645161	1	1.55	0.416233	0.416233
	0.25	2	1	1	1	1	0.645161	2.4025	1	2.4025
	0.25	2	1	0.645161	2.4025	1.55	0.416233	2.4025	0.416233	0.416233
	0.25	2	1	1	1	1.55	0.645161	2.4025	2.4025	1.55
	0.25	2	1	0.645161	2.4025	0.416233	2.4025	0.645161	2.4025	1.55
	0.25	2	1	1.55	2.4025	2.4025	1.55	0.645161	2.4025	1.55
	0.25	2	1	1.55	1.55	1	1.55	1.55	2.4025	2.4025
	0.25	2	0	1	0.645161	0.645161	2.4025	1.55	0.645161	0.645161
	0.25	2	1	1.55	1	0.645161	0.416233	2.4025	1.55	1
	0.25	2	0	0.416233	1.55	2.4025	1	0.416233	2.4025	1
	0.25	2	1	1.55	1.55	0.416233	1	1.55	1.55	1.55
	0.25	2	1	1.55	0.416233	1	1	0.645161	2.4025	0.645161
	0.25	2	0	1	1	2.4025	1	0.645161	1.55	0.645161
	0.25	2	0	1.55	0.416233	0.416233	0.416233	0.416233	1	0.416233
	0.25	2	1	1	1.55	0.416233	2.4025	0.645161	2.4025	1.55
	0.25	2	0	2.4025	0.645161	0.645161	1.55	2.4025	0.645161	1
	0.25	2	1	1	0.645161	2.4025	0.416233	1.55	0.645161	2.4025
	0.25	2	1	1.55	2.4025	1	1.55	1	0.416233	0.645161
	0.25	2	1	0.416233	2.4025	1.55	2.4025	1.55	2.4025	2.4025
	0.25	2	1	2.4025	1.55	1	0.645161	2.4025	1.55	0.645161
	0.25	2	1	0.645161	0.645161	2.4025	1.55	1	0.645161	2.4025
	0.25	2	0	0.416233	0.416233	1	1.55	0.416233	1	1.55
	0.25	2	0	2.4025	1	0.645161	1.55	2.4025	1	2.4025
	0.25	2	0	2.4025	1	1	1	0.416233	1	0.645161
	0.25	2	1	1.55	0.645161	0.416233	1.55	0.416233	0.645161	0.416233
	0.25	2	0	0.416233	1	1	1.55	0.416233	0.416233	1.55
	0.25	2	1	2.4025	2.4025	0.416233	1	2.4025	1	0.416233
	0.25	2	1	1.55	0.416233	1.55	0.416233	1	0.645161	0.645161
	0.25	2	0	0.645161	1.55	0.645161	1.55	2.4025	1	0.416233
	0.25	2	1	1	1	0.416233	1	1.55	0.416233	2.4025
	0.25	2	0	0.645161	1	0.645161	0.645161	2.4025	1.55	0.645161
	0.25	2	0	1.55	1.55	1.55	0.416233	1.55	0.416233	1
	0.25	2	1	0.645161	0.416233	2.4025	1	1.55	1	0.416233
	0.25	2	1	1	1	1.55	0.416233	0.416233	0.645161	0.645161
	0.25	2	1	2.4025	1	0.645161	2.4025	0.416233	0.416233	1.55
	0.25	2	1	0.416233	1	1.55	0.416233	2.4025	2.4025	0.416233
	0.25	2	1	1	0.645161	1.55	0.416233	0.416233	1	1
	0.25	2	0	0.645161	0.416233	1.55	2.4025	1	1.55	1
	0.25	2	1	2.4025	2.4025	0.416233	1	0.416233	1	0.416233
	0.25	2	1	1	0.645161	1	2.4025	0.416233	1.55	0.645161
	0.25	2	1	0.645161	0.416233	0.645161	0.645161	1	1	1
	0.25	2	1	0.416233	0.416233	0.645161	0.645161	2.4025	0.645161	0.416233
	0.25	2	0	1	2.4025	0.645161	2.4025	0.416233	0.416233	0.645161
	0.25	2	1	0.416233	1	1.55	0.645161	2.4025	1	0.416233
	0.25	2	1	0.416233	2.4025	1	0.416233	0.645161	2.4025	0.416233
	0.25	2	1	0.645161	0.645161	0.416233	2.4025	0.416233	2.4025	1.55
	0.25	2	1	1.55	1	1	0.416233	1	1.55	1.55
	0.25	2	1	0.645161	1.55	0.416233	2.4025	1	2.4025	2.4025
	0.25	2	1	0.645161	0.416233	2.4025	1.55	0.645161	1	1
	0.25	2	1	1	0.645161	0.416233	1.55	1.55	1.55	0.645161
	0.25	2	1	0.416233	2.4025	1.55	0.416233	0.645161	1	0.416233
	0.25	2	1	1.55	1.55	0.416233	0.645161	2.4025	1.55	0.416233
	0.25	2	1	1	0.416233	0.645161	1.55	2.4025	0.416233	1
	0.25	2	0	2.4025	2.4025	1	1	0.645161	0.416233	1.55
	0.25	2	1	2.4025	0.416233	2.4025	1	1	2.4025	2.4025
	0.25	2	1	2.4025	1	1	0.416233	2.4025	1.55	1
	0.25	2	1	0.645161	2.4025	2.4025	1	1.55	1	0.416233
	0.25	2	1	2.4025	0.645161	0.416233	1.55	1.55	0.416233	0.416233
	0.25	2	1	1	1.55	0.645161	1.55	0.416233	1.55	2.4025
	0.25	2	0	1.55	0.416233	1	0.416233	1.55	0.645161	1
	0.25	2	0	1	2.4025	1	0.645161	1	2.4025	0.645161
	0.25	2	0	0.645161	1.55	0.416233	1.55	1	1.55	1
	0.25	2	1	1	2.4025	0.416233	0.416233	0.416233	1.55	1
	0.25	2	1	2.4025	2.4025	2.4025	0.645161	0.645161	0.645161	2.4025
	0.25	2	0	0.416233	0.645161	1	1.55	1	0.645161	1
	0.25	2	1	1.55	1.55	0.416233	1.55	1	1.55	0.416233
	0.25	2	0	1.55	0.645161	1	2.4025	0.416233	1.55	0.416233
	0.25	2	1	2.4025	0.645161	2.4025	0.645161	0.645161	2.4025	0.645161
	0.25	2	0	1.55	0.416233	0.416233	1.55	1.55	1	1
	0.25	2	1	0.645161	1.55	1	1	0.416233	2.4025	0.645161
	0.25	2	1	0.645161	0.416233	0.645161	0.416233	0.416233	0.416233	0.645161
	0.25	2	1	1.55	2.4025	0.645161	2.4025	2.4025	1.55	1.55
	0.25	2	0	1	0.645161	0.416233	1.55	0.645161	1	0.645161
	0.25	2	1	0.416233	0.645161	1.55	1	0.645161	2.4025	1
	0.25	2	0	0.645161	0.645161	2.4025	1.55	0.416233	1.55	0.416233
	0.25	2	0	1.55	2.4025	1.55	0.416233	0.416233	0.416233	0.645161
	0.25	2	0	1	1.55	1	2.4025	1	1	0.645161
	0.25	2	0	2.4025	1	1.55	0.416233	0.645161	2.4025	0.416233
	0.25	2	1	1	0.645161	0.645161	1.55	0.645161	0.645161	0.645161
	0.25	2	1	1	1.55	1	2.4025	1	0.645161	0.645161
	0.25	2	1	0.416233	1.55	1	1	1	0.416233	1
	0.25	2	1	2.4025	1.55	1	2.4025	0.416233	2.4025	0.416233
	0.25	2	1	0.416233	0.645161	1.55	0.645161	2.4025	1	2.4025
	0.25	2	1	2.4025	2.4025	1.55	0.416233	1.55	1.55	1.55
	0.25	2	1	1.55	0.416233	0.645161	0.645161	1.55	0.645161	0.416233
	0.25	2	1	1.55	1	2.4025	0.416233	1.55	0.416233	0.416233
	0.25	2	0	0.416233	0.645161	0.645161	1	0.645161	1	0.645161
	0.25	2	0	0.416233	0.645161	1.55	2.4025	2.4025	0.416233	0.645161
	0.25	2	0	1	2.4025	2.4025	1	2.4025	0.416233	0.416233
	0.25	2	1	0.645161	1.55	2.4025	2.4025	0.416233	1.55	2.4025
	0.25	2	1	1	1	2.4025	0.645161	2.4025	1	0.416233
	0.25	2	0	1.55	1.55	0.645161	0.645161	0.416233	2.4025	1.55
	0.25	2	1	0.416233	0.645161	0.645161	0.416233	0.416233	0.645161	1
	0.25	2	1	1.55	2.4025	0.416233	1	0.416233	2.4025	2.4025
	0.25	2	1	0.645161	2.4025	0.645161	0.416233	2.4025	2.4025	2.4025
	0.25	2	0	1.55	1	1	0.416233	1	0.645161	1.55
	0.25	2	1	1.55	1.55	1.55	0.645161	2.4025	0.645161	0.645161
	0.25	2	0	1	0.645161	1.55	1.55	1.55	2.4025	2.4025
	0.25	2	0	1.55	0.645161	1	0.645161	1	2.4025	0.645161
	0.25	2	1	0.645161	2.4025	0.645161	2.4025	1	1	1.55
	0.25	2	0	1	0.416233	2.4025	0.416233	1	1	0.645161
	0.25	2	1	0.645161	1	0.645161	2.4025	0.645161	0.645161	2.4025
	0.25	2	1	0.645161	1.55	1.55	0.645161	1	0.416233	0.645161
	0.25	2	0	1.55	1	1	0.645161	0.416233	0.416233	0.416233
	0.25	2	1	0.645161	2.4025	2.4025	0.416233	1	1	2.4025
	0.25	2	1	1.55	1	1.55	2.4025	1.55	1.55	0.645161
	0.25	2	1	0.416233	1	0.645161	2.4025	2.4025	1.55	0.645161
	0.25	2	0	0.645161	2.4025	1	0.416233	1.55	0.416233	0.645161
	0.25	2	1	2.4025	0.416233	0.416233	0.416233	1	0.416233	0.645161
	0.25	2	0	0.416233	0.645161	0.645161	2.4025	1	0.416233	1.55
	0.25	2	0	1.55	1	2.4025	0.645161	0.645161	0.645161	2.4025
	0.25	2	0	1	1.55	1	1.55	0.645161	1	1
	0.25	2	0	0.645161	1	2.4025	1.55	1.55	0.416233	0.416233
	0.25	2	1	0.645161	1.55	1	1.55	0.416233	2.4025	0.416233
	0.25	2	0	0.645161	1	2.4025	0.416233	2.4025	1.55	1.55
	0.25	2	1	1.55	1	0.416233	0.645161	1.55	1.55	2.4025
	0.25	2	1	0.416233	1	2.4025	2.4025	1	2.4025	0.416233
	0.25	2	1	1.55	0.645161	2.4025	2.4025	1	2.4025	1
	0.25	2	1	2.4025	1	0.645161	2.4025	1	0.416233	0.645161
	0.25	2	1	0.645161	1.55	1	1	2.4025	1.55	0.416233
	0.25	2	0	0.645161	0.645161	2.4025	0.416233	0.416233	2.4025	0.645161
	0.25	2	0	1	2.4025	0.416233	1	1	0.645161	2.4025
	0.25	2	1	1.55	0.645161	1	2.4025	1.55	1	0.416233
	0.25	2	0	2.4025	1.55	0.645161	0.416233	2.4025	1	1.55
	0.25	2	0	0.645161	0.645161	0.416233	0.416233	0.645161	1.55	0.645161
	0.25	2	1	1.55	2.4025	1.55	1.55	0.645161	2.4025	0.416233
	0.25	2	1	1.55	1	2.4025	2.4025	1	2.4025	0.645161
	0.25	2	1	0.416233	0.645161	1.55	1	2.4025	2.4025	1
	0.25	2	1	1	0.416233	0.645161	2.4025	0.416233	0.416233	1.55
	0.25	2	1	0.645161	1.55	2.4025	1.55	0.645161	1	0.645161
	0.25	2	1	2.4025	0.645161	2.4025	1	2.4025	2.4025	1.55
	0.25	2	0	0.645161	0.645161	1.55	0.645161	1	0.416233	0.416233
	0.25	2	0	1	0.645161	2.4025	0.645161	1	0.416233	1
	0.25	2	0	1	0.416233	0.645161	1.55	1	0.645161	2.4025
	0.25	2	1	1	1	0.645161	1	1	2.4025	1
	0.25	2	1	1	0.416233	1.55	2.4025	0.416233	0.645161	2.4025
	0.25	2	1	0.645161	1	2.4025	1	0.645161	0.645161	2.4025
	0.25	2	1	1	0.645161	1	2.4025	1	2.4025	0.416233
	0.25	2	1	0.645161	2.4025	1	2.4025	2.4025	2.4025	0.645161
	0.25	2	1	2.4025	2.4025	0.416233	2.4025	0.645161	1	2.4025
	0.25	2	1	2.4025	0.416233	1	0.416233	1.55	1	0.645161
	0.25	2	0	1.55	1.55	1	1.55	0.416233	1	2.4025
	0.25	2	1	1.55	2.4025	1	1	1	2.4025	0.416233
	0.25	2	0	1	0.416233	2.4025	0.416233	1.55	0.416233	0.645161
	0.25	2	1	1.55	1.55	2.4025	1.55	0.645161	1.55	0.645161
	0.25	2	1	0.645161	1	0.645161	2.4025	1	1	0.645161
	0.25	2	1	0.416233	2.4025	1.55	0.645161	0.416233	0.416233	1
	0.25	2	1	0.645161	2.4025	2.4025	0.416233	1	2.4025	0.645161
	0.25	2	0	1	1.55	1	2.4025	2.4025	1	0.416233
	0.25	2	1	0.416233	1.55	2.4025	1	1.55	1.55	0.645161
	0.25	2	1	2.4025	2.4025	0.416233	0.645161	0.416233	0.645161	1
	0.25	2	1	1.55	0.645161	2.4025	0.645161	0.645161	1	1.55
	0.25	2	1	1	1.55	1	0.645161	2.4025	0.416233	2.4025
	0.25	2	1	0.416233	0.645161	2.4025	0.416233	0.645161	2.4025	0.645161
	0.25	2	0	2.4025	0.645161	2.4025	0.416233	0.416233	0.645161	2.4025
	0.25	2	1	2.4025	1.55	2.4025	1.55	1	1.55	0.645161
	0.25	2	0	2.4025	1.55	1	0.645161	0.416233	1	1
	0.25	2	0	1.55	1	2.4025	0.416233	1.55	0.645161	2.4025
	0.25	2	1	2.4025	1.55	1.55	1	1.55	1	1.55
	0.25	2	0	0.645161	2.4025	1.55	2.4025	0.416233	1	1
	0.25	2	0	1	0.416233	0.645161	0.416233	0.416233	0.645161	1.55
	0.25	2	1	0.645161	0.416233	1	1	1	2.4025	2.4025
	0.25	2	1	0.645161	0.416233	1.55	2.4025	0.416233	2.4025	2.4025
	0.25	2	1	0.416233	1	1.55	1	1.55	0.645161	0.645161
	0.25	2	1	1.55	1	2.4025	0.645161	0.416233	0.416233	2.4025
	0.25	2	1	1.55	0.645161	2.4025	0.416233	1.55	0.416233	0.645161
	0.25	2	1	1.55	0.416233	2.4025	1	1	1.55	2.4025
	0.25	2	1	1.55	1.55	1.55	2.4025	1.55	2.4025	1.55
	0.25	2	0	1.55	0.645161	1	0.645161	1	0.416233	0.416233
	0.25	2	1	0.645161	0.645161	0.645161	0.416233	1	0.645161	1.55
	0.25	2	0	2.4025	0.416233	0.416233	0.416233	0.645161	1	1
	0.25	2	1	0.416233	1.55	1	1.55	1	0.645161	1.55
	0.25	2	1	0.416233	1.55	1	1	1.55	0.645161	0.645161
	0.25	2	1	2.4025	0.645161	1	0.645161	1	1.55	0.416233
	0.25	2	1	0.645161	0.645161	1.55	2.4025	1	2.4025	1
	0.25	2	0	0.645161	0.645161	0.416233	2.4025	1	0.416233	1.55
	0.25	2	1	0.416233	1	1.55	1	0.645161	0.416233	0.645161
	0.25	2	1	1.55	1.55	0.416233	0.645161	1	1	1
	0.25	2	1	1	1.55	0.645161	1.55	2.4025	0.645161	0.645161
	0.25	2	1	1.55	1	0.416233	1	0.645161	1.55	1
	0.25	2	1	0.416233	1	0.416233	2.4025	1	2.4025	0.645161
	0.25	2	1	2.4025	2.4025	0.416233	0.645161	2.4025	1.55	0.645161
	0.25	2	1	0.645161	2.4025	0.416233	1	0.416233	2.4025	0.645161
	0.25	2	1	0.416233	0.416233	2.4025	2.4025	1	1	1
	0.25	2	1	0.645161	1.55	2.4025	0.416233	1.55	1	0.645161
	0.25	2	0	0.645161	2.4025	2.4025	0.416233	0.416233	1.55	1.55
	0.25	2	1	2.4025	2.4025	0.416233	1.55	1.55	0.416233	0.645161
	0.25	2	1	0.416233	2.4025	2.4025	1.55	0.645161	0.645161	0.416233
	0.25	2	1	2.4025	2.4025	1.55	0.645161	0.416233	0.645161	0.645161
	0.25	2	0	2.4025	2.4025	0.416233	1.55	2.4025	0.416233	0.645161
	0.25	2	0	1.55	0.416233	1	1.55	1.55	1.55	1.55
	0.25	2	0	1	0.416233	1.55	2.4025	1	0.645161	1
	0.25	2	0	2.4025	2.4025	1.55	2.4025	1.55	1.55	0.416233
	0.25	2	0	2.4025	0.645161	1.55	1	1	0.416233	0.645161
	0.25	2	1	1	0.645161	0.416233	2.4025	0.645161	1	1
	0.25	2	1	1	2.4025	1	1.55	2.4025	1.55	1
	0.25	2	1	0.645161	1.55	1.55	2.4025	1	0.645161	1.55
	0.25	2	1	0.416233	0.645161	0.416233	1	1.55	1.55	0.416233
	0.25	2	0	0.416233	0.416233	1	1	1.55	2.4025	1
	0.25	2	1	0.416233	1.55	2.4025	0.416233	0.416233	2.4025	1.55
	0.25	2	0	0.645161	0.645161	2.4025	0.645161	0.645161	1.55	1.55
	0.25	2	1	1	1.55	1.55	1.55	0.645161	1.55	1
	0.25	2	1	2.4025	1	0.416233	1.55	1.55	0.645161	0.416233
	0.25	2	0	1	1	0.416233	1	1	1	0.416233
	0.25	2	1	2.4025	1	2.4025	1.55	1.55	2.4025	1.55
	0.25	2	1	0.645161	2.4025	2.4025	1	2.4025	1	2.4025
	0.25	2	1	2.4025	0.416233	2.4025	0.645161	1	1.55	1.55
	0.25	2	1	0.416233	0.416233	2.4025	1.55	2.4025	0.416233	1.55
	0.25	2	0	1	1	0.416233	2.4025	0.416233	1	1
	0.25	2	1	0.416233	2.4025	0.416233	2.4025	0.645161	2.4025	0.645161
	0.25	2	1	0.416233	1	2.4025	2.4025	1	0.416233	1.55
	0.25	2	0	1.55	0.416233	1.55	2.4025	0.645161	0.416233	2.4025
	0.25	2	0	0.416233	1.55	1.55	0.416233	0.645161	1	2.4025
	0.25	2	1	0.416233	1.55	0.416233	2.4025	0.645161	1	0.645161
	0.25	2	1	1.55	0.645161	0.416233	1.55	1	1	0.645161
	0.25	2	1	2.4025	0.645161	0.645161	2.4025	0.645161	2.4025	1
	0.25	2	1	1.55	1	1	0.416233	2.4025	1	2.4025
	0.25	2	0	1	1	1.55	1.55	0.416233	1.55	0.416233
	0.25	2	1	2.4025	0.416233	2.4025	1.55	1.55	1	0.645161
	0.25	2	0	0.416233	2.4025	0.416233	0.416233	0.645161	0.416233	0.645161
	0.25	2	1	2.4025	1.55	1	0.416233	1.55	0.645161	1.55
	0.25	2	0	2.4025	2.4025	0.416233	1.55	0.416233	1	0.645161
	0.25	2	1	1	1.55	1.55	1.55	0.416233	2.4025	0.645161
	0.25	2	1	1	0.416233	1	1	0.645161	2.4025	0.416233
	0.25	2	1	1.55	1	2.4025	2.4025	1	1	0.416233
	0.25	2	1	1	1	0.645161	0.645161	1	1.55	0.416233
	0.25	2	0	1	1.55	1	2.4025	0.645161	0.416233	0.645161
	0.25	2	1	1	1.55	0.645161	1.55	0.416233	0.416233	2.4025
	0.25	2	0	1	0.645161	0.416233	0.645161	2.4025	0.645161	1.55
	0.25	2	1	1	2.4025	0.645161	1.55	0.416233	0.645161	0.416233
	0.25	2	1	0.416233	1	0.645161	2.4025	1.55	0.645161	1.55
	0.25	2	1	1	2.4025	0.416233	0.416233	0.416233	1	1.55
	0.25	2	0	0.416233	1.55	0.645161	0.416233	0.645161	2.4025	1
	0.25	2	0	1	1.55	2.4025	1	2.4025	0.645161	0.416233
	0.25	2	1	0.416233	0.416233	0.416233	1.55	1	0.416233	2.4025
	0.25	2	1	1.55	1	0.416233	1.55	1.55	1	1.55
	0.25	2	1	2.4025	1	1	0.416233	0.416233	2.4025	2.4025
	0.25	2	0	2.4025	2.4025	0.645161	1.55	1	0.645161	1
	0.25	2	0	0.645161	2.4025	2.4025	0.645161	0.645161	2.4025	1.55
	0.25	2	0	1	0.416233	1	0.416233	1	0.416233	0.416233
	0.25	2	1	1	1	1	0.645161	1	2.4025	1.55
	0.25	2	0	0.416233	0.645161	0.645161	2.4025	0.416233	0.645161	1.55
	0.25	2	1	1.55	2.4025	1.55	1.55	2.4025	0.645161	1.55
	0.25	2	0	0.416233	1	0.645161	1	2.4025	1	1
	0.25	2	0	0.416233	1.55	0.416233	0.416233	0.416233	0.645161	0.416233
	0.25	2	0	2.4025	1.55	1	1	0.645161	0.416233	0.645161
	0.25	2	0	2.4025	2.4025	2.4025	1.55	0.645161	0.416233	1.55
	0.25	2	1	0.645161	1	1	0.416233	1.55	0.645161	0.416233
	0.25	2	1	2.4025	1.55	2.4025	1.55	0.645161	2.4025	0.645161
	0.25	2	1	0.416233	1.55	1.55	0.416233	1	0.645161	2.4025
	0.25	2	1	1	1.55	1.55	0.645161	0.416233	2.4025	0.416233
	0.25	2	0	0.416233	0.416233	1.55	0.645161	0.645161	2.4025	0.645161
	0.25	2	0	1.55	1	0.416233	0.416233	2.4025	0.416233	2.4025
	0.25	2	0	0.416233	0.416233	1.55	1.55	0.416233	1	1.55
	0.25	2	1	1.55	0.645161	2.4025	1.55	1	1	0.645161
	0.25	2	0	0.416233	1.55	0.645161	1.55	0.645161	1.55	2.4025
	0.25	2	1	1.55	1.55	1	1.55	0.416233	2.4025	1
	0.25	2	1	0.645161	0.645161	1.55	0.645161	0.416233	2.4025	1
	0.25	2	1	1	0.645161	2.4025	1	0.645161	1.55	2.4025
	0.25	2	0	0.645161	0.416233	0.416233	0.416233	1.55	0.645161	1
	0.25	2	0	1.55	2.4025	1	1	0.416233	1.55	1
	0.25	2	1	1.55	2.4025	0.416233	0.645161	1.55	0.645161	0.416233
	0.25	2	0	0.645161	2.4025	0.645161	0.416233	1.55	1.55	0.645161
	0.25	2	1	1	2.4025	0.416233	2.4025	2.4025	2.4025	1
	0.25	2	1	0.416233	0.416233	0.645161	0.645161	0.645161	1.55	0.416233
	0.25	2	0	0.645161	0.645161	2.4025	1	2.4025	2.4025	2.4025
	0.25	2	1	1	1.55	0.416233	2.4025	0.416233	0.416233	1.55
	0.25	2	0	0.645161	0.645161	0.416233	1	1.55	1	1.55
	0.25	2	1	1.55	1	0.645161	1.55	2.4025	1.55	0.416233
	0.25	2	0	2.4025	0.416233	0.416233	1	0.416233	2.4025	2.4025
	0.25	2	0	2.4025	2.4025	1	1	2.4025	1.55	1
	0.25	2	0	0.416233	1	0.416233	2.4025	0.416233	1	1.55
	0.25	2	0	1	0.416233	2.4025	2.4025	0.416233	1	1
	0.25	2	1	1.55	1	0.645161	0.416233	0.645161	0.645161	0.416233
	0.25	2	0	0.416233	0.416233	1	1.55	0.645161	1	1.55
	0.25	2	0	1	0.645161	1.55	0.645161	0.416233	0.645161	0.416233
	0.25	2	0	2.4025	1.55	2.4025	0.645161	1.55	0.416233	0.416233
	0.25	2	1	2.4025	1.55	1.55	1.55	0.645161	2.4025	0.416233
	0.25	3	1	0.645161	1.55	0.416233	1.55	2.4025	1.55	1
	0.25	3	1	0.416233	0.416233	1	0.416233	0.416233	0.645161	0.645161
	0.25	3	0	1	0.416233	0.416233	0.645161	0.416233	0.416233	1
	0.25	3	1	0.416233	1	0.645161	0.416233	0.645161	1.55	2.4025
	0.25	3	0	1	2.4025	0.645161	0.645161	1.55	1.55	0.645161
	0.25	3	0	1	1	1.55	2.4025	0.416233	1	1
	0.25	3	0	2.4025	0.416233	1.55	2.4025	1	1	2.4025
	0.25	3	1	0.645161	1	1.55	1	2.4025	1	0.416233
	0.25	3	1	2.4025	1	2.4025	1.55	0.645161	1.55	1
	0.25	3	1	0.416233	0.416233	1.55	1.55	0.645161	1.55	0.645161
	0.25	3	1	2.4025	0.645161	1	0.645161	2.4025	1	1
	0.25	3	0	1	0.645161	1.55	1.55	1.55	1	0.645161
	0.25	3	1	1	0.645161	1.55	0.416233	0.416233	0.416233	1.55
	0.25	3	0	1.55	0.416233	1.55	2.4025	1.55	1.55	0.416233
	0.25	3	1	1	1	2.4025	1.55	2.4025	2.4025	1
	0.25	3	1	1	0.416233	0.645161	2.4025	1	1	1.55
	0.25	3	1	1.55	2.4025	1.55	0.645161	0.645161	1	1
	0.25	3	1	0.645161	1.55	2.4025	1	2.4025	0.645161	1
	0.25	3	1	1	2.4025	1	2.4025	0.645161	0.416233	1
	0.25	3	1	1.55	0.645161	2.4025	2.4025	1	2.4025	1
	0.25	3	1	2.4025	2.4025	1.55	1.55	0.645161	1	1
	0.25	3	0	1	0.645161	1	1.55	1	1	0.416233
	0.25	3	1	1.55	2.4025	0.416233	1.55	0.416233	1.55	2.4025
	0.25	3	1	0.645161	1	2.4025	0.416233	1	0.416233	2.4025
	0.25	3	0	0.416233	0.645161	1	1.55	0.416233	2.4025	2.4025
	0.25	3	1	0.416233	0.416233	2.4025	2.4025	0.416233	0.645161	1.55
	0.25	3	1	1.55	0.645161	1.55	2.4025	2.4025	1	1.55
	0.25	3	1	1	1	0.645161	0.416233	1.55	0.645161	0.645161
	0.25	3	1	1.55	1.55	1	1.55	1.55	0.645161	0.416233
	0.25	3	0	0.645161	0.645161	1.55	1.55	1.55	0.416233	0.416233
	0.25	3	1	1.55	2.4025	1.55	0.416233	2.4025	1	1.55
	0.25	3	0	2.4025	1	1	0.645161	0.416233	1	1
	0.25	3	0	2.4025	0.416233	0.416233	1	0.416233	2.4025	1.55
	0.25	3	1	0.645161	2.4025	0.645161	1.55	0.416233	2.4025	0.645161
	0.25	3	1	1	1	1.55	2.4025	1	0.645161	2.4025
	0.25	3	1	1.55	2.4025	0.645161	2.4025	0.416233	0.416233	1.55
	0.25	3	1	2.4025	1	1.55	1	0.645161	2.4025	1.55
	0.25	3	1	1.55	2.4025	1	1.55	0.416233	0.416233	2.4025
	0.25	3	1	1	2.4025	1.55	0.645161	0.416233	0.416233	0.645161
	0.25	3	1	0.645161	1	1	2.4025	1.55	1	1.55
	0.25	3	0	1	1.55	1.55	2.4025	0.645161	0.645161	0.645161
	0.25	3	1	0.416233	1.55	1.55	1.55	1.55	0.645161	1
	0.25	3	1	0.645161	1.55	1.55	0.645161	0.416233	1	0.416233
	0.25	3	0	0.416233	1.55	1	2.4025	0.416233	0.416233	1.55
	0.25	3	0	2.4025	1	0.416233	0.416233	0.645161	0.645161	1
	0.25	3	1	2.4025	1.55	2.4025	0.645161	1	0.645161	2.4025
	0.25	3	1	0.416233	1	2.4025	0.416233	0.645161	2.4025	2.4025
	0.25	3	1	1.55	0.645161	0.416233	0.416233	1.55	2.4025	0.416233
	0.25	3	0	0.645161	0.645161	1	1.55	0.645161	0.645161	0.416233
	0.25	3	0	0.645161	0.645161	1	0.645161	0.416233	0.645161	1.55
	0.25	3	1	2.4025	0.645161	1	1.55	0.645161	0.645161	0.645161
	0.25	3	1	0.416233	1.55	0.645161	1	0.416233	2.4025	0.645161
	0.25	3	1	1	0.645161	1.55	1.55	2.4025	1	1.55
	0.25	3	1	2.4025	2.4025	0.416233	1.55	2.4025	1.55	0.645161
	0.25	3	0	1.55	2.4025	0.645161	0.416233	2.4025	1	1
	0.25	3	0	2.4025	1	1.55	0.416233	0.645161	2.4025	0.645161
	0.25	3	1	0.416233	0.416233	0.645161	2.4025	0.416233	2.4025	2.4025
	0.25	3	1	0.645161	2.4025	1.55	2.4025	1	0.416233	0.416233
	0.25	3	0	1	2.4025	0.416233	1.55	1.55	1	1.55
	0.25	3	1	0.416233	0.416233	1	2.4025	0.645161	1.55	2.4025
	0.25	3	0	2.4025	0.416233	2.4025	0.416233	0.416233	0.645161	1
	0.25	3	1	1.55	2.4025	1	1.55	2.4025	0.645161	0.645161
	0.25	3	1	0.645161	0.645161	0.416233	1	0.645161	0.416233	0.645161
	0.25	3	1	0.645161	0.645161	0.645161	0.416233	0.645161	0.645161	0.416233
	0.25	3	1	2.4025	0.416233	0.416233	1	0.645161	0.645161	2.4025
	0.25	3	1	0.645161	1	1	1	2.4025	2.4025	1
	0.25	3	1	2.4025	0.416233	0.645161	2.4025	1	1	2.4025
	0.25	3	1	2.4025	0.645161	2.4025	1	0.416233	2.4025	2.4025
	0.25	3	1	1	1.55	1.55	2.4025	1.55	1	0.416233
	0.25	3	0	0.645161	2.4025	0.416233	1.55	1.55	2.4025	1.55
	0.25	3	1	1.55	0.645161	1.55	2.4025	1	1.55	1
	0.25	3	1	2.4025	0.416233	0.645161	1.55	2.4025	0.416233	0.645161
	0.25	3	0	0.645161	0.645161	2.4025	1	0.416233	1	1
	0.25	3	0	1.55	1	2.4025	0.645161	0.416233	2.4025	1.55
	0.25	3	0	0.416233	0.416233	0.416233	2.4025	2.4025	1	1
	0.25	3	1	1	1	2.4025	1.55	2.4025	1.55	1.55
	0.25	3	1	2.4025	2.4025	1.55	2.4025	1	1.55	0.645161
	0.25	3	1	2.4025	0.645161	1	1	2.4025	1.55	0.645161
	0.25	3	1	0.645161	0.645161	0.416233	1.55	0.416233	2.4025	2.4025
	0.25	3	1	1	2.4025	1.55	0.416233	2.4025	0.645161	1
	0.25	3	1	1.55	0.645161	0.645161	0.645161	0.645161	0.645161	0.645161
	0.25	3	1	0.645161	1	2.4025	0.416233	1.55	0.416233	1
	0.25	3	0	1.55	2.4025	0.416233	2.4025	1	1	2.4025
	0.25	3	1	1.55	0.645161	0.416233	1	0.416233	2.4025	2.4025
	0.25	3	0	1	0.416233	1	0.645161	1.55	1.55	2.4025
	0.25	3	1	1	0.416233	1	0.645161	2.4025	1.55	0.416233
	0.25	3	0	1	1.55	1.55	1	0.645161	0.645161	1.55
	0.25	3	0	2.4025	2.4025	0.645161	0.645161	1.55	1.55	0.416233
	0.25	3	1	1.55	2.4025	1.55	1.55	0.416233	1	0.645161
	0.25	3	0	1	1.55	1.55	1.55	0.645161	0.416233	0.416233
	0.25	3	1	2.4025	0.416233	0.416233	1	2.4025	1.55	0.645161
	0.25	3	1	0.645161	2.4025	0.416233	1	2.4025	0.416233	0.416233
	0.25	3	1	1.55	0.416233	2.4025	1	0.416233	0.416233	0.416233
	0.25	3	1	1.55	2.4025	1	1.55	0.416233	0.645161	2.4025
	0.25	3	1	0.645161	1.55	1.55	2.4025	0.645161	0.645161	1.55
	0.25	3	0	0.416233	0.416233	0.645161	0.645161	2.4025	0.416233	1
	0.25	3	1	2.4025	0.645161	1	1.55	0.645161	2.4025	0.416233
	0.25	3	1	1	2.4025	0.645161	1	1.55	0.416233	0.416233
	0.25	3	1	0.645161	1	1	1.55	0.645161	1	0.645161
	0.25	3	0	2.4025	2.4025	0.645161	0.645161	1	0.416233	0.416233
	0.25	3	1	2.4025	1.55	1	0.645161	2.4025	1.55	0.645161
	0.25	3	1	1.55	0.416233	1.55	1	2.4025	0.416233	2.4025
	0.25	3	1	2.4025	0.645161	0.416233	0.416233	0.645161	1.55	0.416233
	0.25	3	0	1	1	1.55	2.4025	0.645161	1.55	1.55
	0.25	3	1	1.55	2.4025	0.645161	1	2.4025	0.416233	1.55
	0.25	3	1	0.416233	1.55	2.4025	2.4025	2.4025	0.416233	2.4025
	0.25	3	0	0.416233	1	1.55	0.645161	0.416233	0.645161	1
	0.25	3	1	0.645161	1	2.4025	2.4025	0.416233	1.55	0.416233
	0.25	3	1	1.55	1	1	1.55	0.416233	0.416233	1
	0.25	3	1	1.55	0.416233	0.416233	1.55	2.4025	0.416233	1
	0.25	3	0	1.55	1.55	0.416233	2.4025	1.55	0.416233	1
	0.25	3	1	1	1.55	1.55	0.645161	0.645161	2.4025	0.416233
	0.25	3	0	1.55	1.55	1.55	2.4025	2.4025	2.4025	0.416233
	0.25	3	1	0.645161	1	1.55	2.4025	0.645161	1	2.4025
	0.25	3	0	1	1	0.416233	1.55	1.55	0.645161	2.4025
	0.25	3	1	1.55	0.416233	2.4025	2.4025	1.55	2.4025	0.645161
	0.25	3	1	1.55	0.645161	1.55	0.416233	1.55	0.416233	0.645161
	0.25	3	1	0.416233	1	2.4025	0.645161	0.416233	2.4025	0.645161
	0.25	3	1	0.416233	1.55	2.4025	0.416233	0.416233	0.416233	2.4025
	0.25	3	1	2.4025	1.55	1.55	0.416233	0.645161	2.4025	1.55
	0.25	3	0	1	1.55	1	0.416233	0.416233	0.645161	0.645161
	0.25	3	1	0.645161	2.4025	1.55	2.4025	0.645161	2.4025	0.645161
	0.25	3	0	0.645161	1.55	1	1	1	1.55	0.645161
	0.25	3	0	1.55	1	0.645161	1.55	0.416233	1.55	0.416233
	0.25	3	1	0.645161	0.416233	0.645161	1.55	1	1	0.416233
	0.25	3	0	1.55	0.416233	1.55	2.4025	1.55	1	1.55
	0.25	3	1	0.416233	2.4025	1.55	0.416233	0.645161	1.55	0.416233
	0.25	3	1	0.416233	0.645161	1.55	1	2.4025	0.645161	2.4025
	0.25	3	1	0.645161	2.4025	0.416233	1.55	1	1.55	2.4025
	0.25	3	1	0.416233	0.416233	2.4025	1	0.416233	1.55	1.55
	0.25	3	0	1.55	2.4025	1	0.416233	0.416233	2.4025	1
	0.25	3	0	1.55	1	2.4025	0.645161	0.645161	2.4025	1
	0.25	3	1	0.645161	2.4025	1	0.416233	0.645161	2.4025	1
	0.25	3	0	1	0.645161	2.4025	0.416233	2.4025	2.4025	0.645161
	0.25	3	1	0.416233	2.4025	0.645161	0.645161	1	0.416233	1
	0.25	3	1	1.55	1.55	1.55	0.416233	1.55	1	1
	0.25	3	0	1	2.4025	1	2.4025	1	1	0.645161
	0.25	3	0	0.645161	0.416233	0.416233	1	2.4025	1	0.416233
	0.25	3	0	1.55	1	0.416233	1	0.645161	1.55	0.416233
	0.25	3	0	0.416233	1.55	1	0.416233	0.416233	2.4025	0.416233
	0.25	3	1	0.645161	1	1	2.4025	0.645161	2.4025	1
	0.25	3	0	0.645161	2.4025	0.416233	1	1	1.55	0.416233
	0.25	3	1	2.4025	1	0.416233	2.4025	1.55	2.4025	0.416233
	0.25	3	0	1.55	1	1.55	0.416233	0.416233	0.416233	0.416233
	0.25	3	0	1.55	1	1	1.55	2.4025	1	0.416233
	0.25	3	1	2.4025	0.645161	1	2.4025	2.4025	0.645161	2.4025
	0.25	3	0	0.416233	0.416233	1	0.416233	2.4025	0.416233	2.4025
	0.25	3	1	0.645161	1.55	0.416233	1	1	1	2.4025
	0.25	3	1	1.55	1	1	1.55	2.4025	1.55	1.55
	0.25	3	0	0.645161	1.55	1.55	1	0.416233	0.416233	2.4025
	0.25	3	1	0.645161	0.416233	2.4025	1.55	1.55	1	0.645161
	0.25	3	1	1.55	0.416233	1.55	1.55	2.4025	1	0.416233
	0.25	3	1	0.645161	1.55	1.55	2.4025	0.416233	0.645161	1.55
	0.25	3	1	0.416233	2.4025	0.416233	1.55	0.645161	1	0.645161
	0.25	3	0	2.4025	1.55	2.4025	1	0.416233	0.416233	1.55
	0.25	3	1	1.55	0.416233	0.645161	0.416233	1.55	0.416233	0.645161
	0.25	3	0	1	2.4025	0.645161	0.416233	1.55	0.416233	2.4025
	0.25	3	0	2.4025	0.645161	0.645161	0.645161	0.416233	0.416233	2.4025
	0.25	3	1	0.416233	0.645161	2.4025	1.55	0.416233	1	1.55
	0.25	3	1	2.4025	0.645161	2.4025	1	1.55	1	0.416233
	0.25	3	1	1	2.4025	0.416233	1	0.416233	2.4025	1
	0.25	3	1	1.55	0.416233	1	0.416233	1	2.4025	0.645161
	0.25	3	1	2.4025	0.645161	1	1.55	1.55	0.416233	1.55
	0.25	3	1	1	1	1	1	1	1.55	0.645161
	0.25	3	0	0.416233	0.645161	1.55	0.416233	0.645161	2.4025	1.55
	0.25	3	0	2.4025	1	1	0.416233	1	0.645161	1
	0.25	3	0	1	2.4025	0.645161	1	1.55	1.55	1
	0.25	3	0	0.416233	2.4025	0.416233	1.55	0.645161	1	0.645161
	0.25	3	1	1.55	0.416233	0.416233	1	1	2.4025	1.55
	0.25	3	0	1	1.55	1.55	1.55	1.55	0.416233	0.416233
	0.25	3	1	1.55	2.4025	1	2.4025	0.416233	0.645161	1.55
	0.25	3	0	0.645161	1.55	2.4025	0.645161	0.645161	1	1.55
	0.25	3	1	1	0.645161	1	0.416233	0.645161	1	1
	0.25	3	1	0.416233	2.4025	1	0.645161	0.416233	2.4025	2.4025
	0.25	3	0	0.416233	2.4025	2.4025	1	0.416233	2.4025	1
	0.25	3	1	2.4025	0.416233	0.416233	2.4025	1.55	0.416233	1
	0.25	3	1	1	1.55	0.416233	1.55	0.416233	0.416233	0.645161
	0.25	3	0	1.55	0.416233	0.645161	0.645161	2.4025	0.416233	0.645161
	0.25	3	1	1	0.416233	0.645161	1	2.4025	0.416233	0.645161
	0.25	3	1	1	0.645161	0.645161	0.645161	0.416233	1.55	0.416233
	0.25	3	0	0.645161	0.645161	1	2.4025	1	2.4025	1
	0.25	3	1	1	1	2.4025	0.416233	2.4025	1	0.416233
	0.25	3	1	2.4025	1	0.416233	2.4025	0.645161	0.416233	0.645161
	0.25	3	1	1.55	1	2.4025	1.55	1.55	2.4025	1.55
	0.25	3	1	2.4025	1.55	0.645161	0.645161	0.645161	2.4025	2.4025
	0.25	3	1	2.4025	1	1.55	0.416233	0.416233	0.416233	0.416233
	0.25	3	0	1.55	2.4025	2.4025	1	2.4025	0.645161	0.645161
	0.25	3	1	2.4025	0.416233	0.416233	1	2.4025	1.55	1
	0.25	3	1	0.416233	0.416233	0.416233	0.416233	1.55	1	1
	0.25	3	0	1.55	1	1	0.416233	0.416233	1	2.4025
	0.25	3	1	2.4025	2.4025	2.4025	0.416233	1.55	1.55	1
	0.25	3	0	0.416233	2.4025	2.4025	0.416233	1.55	0.645161	0.416233
	0.25	3	1	1	0.645161	0.416233	1	1.55	0.416233	0.645161
	0.25	3	1	2.4025	1.55	2.4025	1	1	1.55	0.645161
	0.25	3	1	0.416233	2.4025	0.416233	1.55	0.645161	1	2.4025
	0.25	3	1	2.4025	2.4025	0.416233	1.55	0.645161	1	2.4025
	0.25	3	1	1	2.4025	1.55	1	1.55	0.645161	1.55
	0.25	3	1	1	1	2.4025	2.4025	0.416233	2.4025	1.55
	0.25	3	1	0.416233	0.645161	2.4025	1.55	1	0.416233	1.55
	0.25	3	1	0.645161	2.4025	1	0.416233	1.55	1.55	1
	0.25	3	1	0.645161	0.645161	1	0.645161	0.645161	0.416233	1
	0.25	3	0	0.416233	1	0.416233	0.416233	0.645161	0.416233	1.55
	0.25	3	1	0.645161	0.645161	0.416233	1.55	2.4025	0.416233	1
	0.25	3	0	0.645161	0.645161	2.4025	1.55	2.4025	1.55	0.645161
	0.25	3	1	1.55	0.416233	0.645161	2.4025	0.416233	2.4025	0.416233
	0.25	3	1	0.645161	0.645161	1	0.645161	2.4025	1.55	1.55
	0.25	3	1	0.416233	0.645161	0.645161	0.645161	2.4025	0.645161	0.645161
	0.25	3	1	1.55	1	1	1	0.645161	1	1.55
	0.25	3	1	1.55	0.416233	1.55	1.55	0.416233	2.4025	0.645161
	0.25	3	0	2.4025	0.645161	1	1.55	2.4025	0.645161	1
	0.25	3	1	0.416233	1	1.55	0.416233	2.4025	1	0.645161
	0.25	3	0	0.416233	0.645161	0.416233	2.4025	1.55	1	0.645161
	0.25	3	0	1	1	1.55	1	1	1	1
	0.25	3	1	1	1	2.4025	1	1	1	1
	0.25	3	1	0.416233	1.55	1	0.645161	1.55	0.416233	1
	0.25	3	0	2.4025	1	1.55	1.55	1.55	0.416233	2.4025
	0.25	3	0	1.55	1.55	1.55	1.55	0.645161	0.416233	0.645161
	0.25	3	0	2.4025	2.4025	2.4025	0.416233	0.645161	1.55	0.645161
	0.25	3	0	1	0.416233	0.416233	1	0.645161	1.55	0.416233
	0.25	3	1	2.4025	2.4025	1.55	1.55	1.55	1.55	0.645161
	0.25	3	1	1.55	1.55	0.416233	0.645161	0.645161	0.416233	1
	0.25	3	1	0.645161	0.645161	2.4025	1	0.645161	0.416233	0.645161
	0.25	3	1	0.416233	1.55	2.4025	2.4025	1	2.4025	1
	0.25	3	1	0.416233	0.416233	0.645161	0.645161	2.4025	1.55	1
	0.25	3	1	0.416233	1	1.55	0.645161	2.4025	1	2.4025
	0.25	3	1	1	0.645161	1	1.55	0.645161	0.645161	2.4025
	0.25	3	0	0.416233	0.416233	1	1.55	1	0.416233	1
	0.25	3	1	1	0.416233	1	2.4025	2.4025	1	0.416233
	0.25	3	1	0.416233	2.4025	1	1.55	1	2.4025	1
	0.25	3	0	2.4025	0.645161	2.4025	0.416233	1	0.645161	1
	0.25	3	1	0.645161	0.416233	1	0.416233	2.4025	0.416233	2.4025
	0.25	3	1	0.645161	1.55	1.55	1	1.55	0.645161	0.645161
	0.25	3	1	2.4025	0.645161	1.55	0.645161	1	2.4025	2.4025
	0.25	3	1	1	1	2.4025	0.645161	0.416233	0.645161	2.4025
	0.25	3	1	0.645161	1.55	1	0.416233	2.4025	1	0.416233
	0.25	3	0	2.4025	1.55	0.416233	1	2.4025	0.645161	0.645161
	0.25	3	1	1.55	1	1.55	1	2.4025	1	2.4025
	0.25	3	1	0.645161	0.416233	1.55	2.4025	1	0.416233	0.416233
	0.25	3	0	0.645161	2.4025	1.55	1.55	1.55	0.416233	2.4025
	0.25	3	0	1	0.645161	1	0.416233	1	0.645161	1
	0.25	3	0	0.416233	0.416233	0.416233	1.55	1	1	0.645161
	0.25	3	1	0.645161	2.4025	1	2.4025	2.4025	1.55	0.416233
	0.25	3	1	0.416233	1.55	1.55	2.4025	0.645161	0.416233	1.55
	0.25	3	1	0.645161	2.4025	1.55	0.416233	0.645161	0.645161	0.645161
	0.25	3	0	1.55	1.55	1.55	1.55	0.645161	0.645161	1
	0.25	3	1	2.4025	0.416233	1	1	0.416233	0.416233	1
	0.25	3	0	0.645161	2.4025	1	1.55	0.416233	1	0.645161
	0.25	3	1	1.55	0.645161	2.4025	0.645161	0.645161	2.4025	0.645161
	0.25	3	1	1.55	1	1.55	2.4025	1.55	2.4025	0.416233
	0.25	3	1	0.416233	1	2.4025	1.55	0.645161	1.55	2.4025
	0.25	3	1	0.645161	2.4025	0.645161	0.416233	2.4025	1.55	0.645161
	0.25	3	0	0.645161	0.645161	0.416233	1	0.645161	0.645161	1
	0.25	3	0	1	0.416233	1.55	1.55	0.645161	0.645161	1.55
	0.25	3	1	2.4025	0.645161	1.55	1	1	1	1.55
	0.25	3	1	0.645161	1	2.4025	2.4025	1.55	1.55	0.645161
	0.25	3	1	2.4025	0.645161	1	0.645161	1	0.645161	1
	0.25	3	1	2.4025	0.645161	0.416233	0.416233	0.416233	1	1
	0.25	3	1	1	0.645161	2.4025	2.4025	0.645161	0.416233	0.645161
	0.25	3	0	1.55	0.645161	1	0.416233	1.55	0.416233	1.55
	0.25	3	0	2.4025	0.645161	0.416233	2.4025	0.645161	1.55	2.4025
	0.25	3	1	0.645161	2.4025	0.645161	1	0.416233	0.416233	0.645161
	0.25	3	0	0.645161	0.416233	0.645161	2.4025	0.416233	1	1.55
	0.25	3	1	0.416233	2.4025	2.4025	1.55	0.416233	0.416233	2.4025
	0.25	3	1	0.416233	1.55	2.4025	1.55	1	0.645161	0.416233
	0.25	3	0	2.4025	0.416233	0.416233	1.55	0.416233	1.55	0.645161
	0.25	3	0	1.55	1	2.4025	1.55	0.416233	2.4025	0.645161
	0.25	3	1	2.4025	2.4025	0.416233	1	0.416233	1	1.55
	0.25	3	0	1	0.645161	1.55	2.4025	1	1	2.4025
	0.25	3	0	1	0.416233	1	2.4025	1	1	0.645161
	0.25	3	1	2.4025	0.416233	2.4025	1	0.416233	0.416233	1
	0.25	3	1	1	1	0.645161	2.4025	1	2.4025	1.55
	0.25	3	0	1.55	0.416233	0.645161	0.645161	1.55	1.55	2.4025
	0.25	3	1	0.645161	0.416233	1.55	0.416233	2.4025	2.4025	1
	0.25	3	0	1	1.55	1	1.55	1	0.645161	0.645161
	0.25	3	0	1.55	1	0.416233	1.55	0.645161	0.645161	1.55
	0.25	3	1	1	2.4025	1.55	1	0.416233	0.416233	0.416233
	0.25	3	1	0.645161	1.55	2.4025	0.645161	2.4025	1.55	0.416233
	0.25	3	0	0.416233	0.416233	2.4025	0.645161	0.416233	2.4025	1
	0.25	3	1	0.416233	1.55	1	1.55	0.645161	1.55	1
	0.25	3	0	1	0.416233	1	0.416233	1	2.4025	1
	0.25	3	1	0.416233	0.416233	1.55	2.4025	1.55	0.416233	0.645161
	0.25	3	1	0.416233	1.55	0.416233	0.416233	1.55	2.4025	2.4025
	0.25	3	1	1.55	2.4025	1.55	0.416233	1	1.55	1.55
	0.25	3	1	1.55	0.645161	1	1	2.4025	1	1
	0.25	3	0	2.4025	2.4025	0.416233	2.4025	0.416233	0.416233	0.645161
	0.25	3	1	1.55	1	2.4025	2.4025	0.645161	2.4025	0.416233
	0.25	3	0	0.645161	1.55	0.416233	1	0.645161	0.416233	2.4025
	0.25	3	0	1.55	0.645161	0.416233	0.645161	0.416233	2.4025	0.645161
	0.25	3	1	0.416233	1.55	0.416233	1	2.4025	2.4025	1.55
	0.25	3	0	2.4025	0.416233	1	0.645161	1.55	0.416233	0.416233
	0.25	3	1	1.55	1	1.55	2.4025	2.4025	1	1
	0.25	3	1	1	1.55	0.645161	1.55	0.645161	2.4025	0.645161
	0.25	3	0	1	1	1.55	2.4025	0.416233	0.416233	0.645161
	0.25	3	1	1	2.4025	1	1.55	1	0.645161	0.416233
	0.25	3	1	0.645161	0.416233	1.55	1.55	0.416233	0.416233	1.55
	0.25	3	1	0.645161	1.55	2.4025	0.645161	1	2.4025	1.55
	0.25	3	0	0.645161	1.55	2.4025	0.416233	0.645161	2.4025	2.4025
	0.25	3	1	0.645161	0.416233	0.416233	0.645161	0.416233	0.645161	2.4025
	0.25	3	1	1	1.55	0.416233	1.55	0.416233	0.645161	1
	0.25	3	1	1.55	1.55	1	0.645161	2.4025	1	0.416233
	0.25	3	0	1.55	1	2.4025	0.645161	0.416233	2.4025	2.4025
	0.25	3	1	0.416233	0.416233	2.4025	0.416233	1.55	0.645161	0.645161
	0.25	3	1	1	1	1	0.416233	0.645161	1	0.645161
	0.25	3	0	1	0.645161	2.4025	1.55	1	1	1.55
	0.25	3	0	2.4025	0.645161	2.4025	2.4025	0.645161	1	1
	0.25	3	0	0.645161	1.55	0.416233	0.645161	1	1	0.645161
	0.25	3	1	1.55	1	0.645161	2.4025	1	2.4025	1
	0.25	3	0	1.55	0.416233	1	0.416233	2.4025	1.55	2.4025
	0.25	3	1	2.4025	0.416233	2.4025	1.55	0.416233	1.55	1.55
	0.25	3	1	0.416233	2.4025	0.645161	0.416233	1	1	2.4025
	0.25	3	1	2.4025	1	1.55	0.416233	1.55	1	1.55
	0.25	3	0	1	2.4025	1	0.416233	0.645161	2.4025	1.55
	0.25	3	1	0.645161	0.645161	0.645161	1.55	2.4025	0.416233	1.55
	0.25	3	1	2.4025	2.4025	2.4025	1	0.645161	1.55	0.645161
	0.25	3	0	1	0.645161	0.645161	1	0.416233	2.4025	0.645161
	0.25	3	1	1	0.645161	2.4025	1	1	0.645161	0.416233
	0.25	3	1	1.55	1.55	1	0.416233	1	2.4025	1
	0.25	3	0	1	1.55	1.55	0.645161	0.416233	0.645161	1.55
	0.25	3	1	2.4025	0.645161	2.4025	2.4025	0.645161	1.55	1
	0.25	3	0	1	1	1.55	1.55	0.416233	0.645161	0.645161
	0.25	3	0	1	0.645161	0.416233	0.416233	0.645161	0.416233	0.416233
	0.25	3	1	0.416233	0.645161	1.55	0.645161	1.55	2.4025	1
	0.25	3	0	0.416233	1	0.416233	2.4025	1	1	0.416233
	0.25	3	1	1.55	1	2.4025	1.55	1.55	2.4025	1.55
	0.25	3	1	0.416233	1.55	1	0.645161	2.4025	1	1
	0.25	3	0	0.416233	1	0.416233	0.416233	0.645161	1	1.55
	0.25	3	0	1.55	2.4025	0.416233	1.55	0.416233	0.645161	1.55
	0.25	3	1	1.55	1.55	0.416233	0.645161	2.4025	2.4025	0.645161
	0.25	3	1	0.645161	1	0.645161	0.416233	1	2.4025	0.645161
	0.25	3	0	1	2.4025	2.4025	0.416233	1.55	1	0.416233
	0.25	3	0	1	1	0.645161	1	0.645161	2.4025	1
	0.25	3	1	1.55	0.416233	0.645161	1.55	1.55	1.55	1.55
	0.25	3	1	2.4025	0.416233	1.55	0.645161	0.416233	1.55	2.4025
	0.25	3	1	1.55	0.645161	0.416233	2.4025	0.645161	0.645161	2.4025
	0.25	3	1	0.645161	0.645161	0.645161	2.4025	2.4025	1.55	2.4025
	0.25	3	1	1	0.416233	1	0.645161	0.645161	0.416233	2.4025
	0.25	3	1	1.55	2.4025	1	0.416233	1	1	0.645161
	0.25	3	0	2.4025	1	0.416233	1.55	0.416233	0.416233	1
	0.25	3	1	0.416233	1	1	0.416233	0.645161	2.4025	2.4025
	0.25	3	1	2.4025	1.55	0.416233	1	1.55	2.4025	2.4025
	0.25	3	1	1.55	0.416233	2.4025	0.645161	0.645161	0.416233	0.645161
	0.25	3	1	2.4025	0.416233	0.645161	0.645161	1.55	0.416233	0.645161
	0.25	3	1	1	0.645161	0.416233	1	2.4025	1	2.4025
	0.25	3	0	1.55	0.416233	1	2.4025	1	0.416233	0.416233
	0.25	3	0	0.645161	1	2.4025	0.416233	0.645161	1	0.416233
	0.25	3	0	2.4025	1	0.645161	1	0.645161	2.4025	1
	0.25	3	0	2.4025	1	0.645161	0.645161	2.4025	1.55	0.416233
	0.25	3	1	0.645161	1.55	1.55	1.55	2.4025	1.55	1.55
	0.25	3	1	0.416233	1.55	2.4025	0.416233	0.645161	1	1
	0.25	3	1	2.4025	1	1	2.4025	1.55	0.416233	0.645161
	0.25	3	1	1	0.645161	1.55	0.416233	0.416233	1.55	0.416233
	0.25	3	0	0.416233	1	2.4025	0.645161	1.55	0.645161	1.55
	0.25	3	1	2.4025	0.416233	1	1	2.4025	0.645161	1.55
	0.25	3	0	1.55	1.55	2.4025	1.55	1.55	2.4025	2.4025
	0.25	3	1	0.645161	0.645161	0.645161	2.4025	0.645161	2.4025	0.645161
	0.25	3	0	2.4025	0.645161	1	1.55	1	0.416233	1
	0.25	3	1	0.416233	0.645161	0.416233	2.4025	2.4025	2.4025	1.55
	0.25	3	1	2.4025	0.416233	2.4025	1.55	1.55	0.645161	0.416233
	0.25	3	0	0.645161	0.416233	0.645161	1.55	1.55	1	1
	0.25	3	1	2.4025	0.416233	2.4025	1	1.55	1	1.55
	0.25	3	1	2.4025	0.416233	1.55	0.645161	1.55	1	1.55
	0.25	3	1	2.4025	2.4025	1.55	0.645161	1	2.4025	2.4025
	0.25	3	0	2.4025	1.55	1.55	2.4025	1.55	0.645161	1.55
	0.25	3	0	0.416233	0.645161	1	2.4025	2.4025	1.55	0.645161
	0.25	3	0	1	1	1	1	2.4025	0.645161	0.416233
	0.25	3	1	0.645161	1	0.416233	1.55	0.416233	0.416233	1.55
	0.25	3	1	2.4025	1	0.416233	2.4025	1	1	0.645161
	0.25	3	0	0.416233	1.55	1.55	0.416233	0.645161	2.4025	0.645161
	0.25	3	0	0.645161	0.645161	0.645161	0.645161	2.4025	0.645161	1.55
	0.25	3	1	0.416233	1	1.55	0.645161	1	1	1
	0.25	3	1	1	2.4025	1.55	2.4025	0.416233	1.55	0.416233
	0.25	3	1	2.4025	0.645161	2.4025	0.416233	1	2.4025	2.4025
	0.25	3	1	0.645161	2.4025	1.55	0.645161	0.645161	2.4025	0.645161
	0.25	3	1	1.55	0.416233	1.55	1	0.416233	0.645161	0.416233
	0.25	3	1	1.55	0.645161	0.416233	1	0.416233	0.645161	1.55
	0.25	3	1	0.416233	0.416233	1.55	0.645161	0.645161	1	2.4025
	0.25	3	1	0.645161	2.4025	1.55	2.4025	0.416233	0.645161	0.416233
	0.25	3	1	1.55	1.55	1	2.4025	1.55	1.55	2.4025
	0.25	3	0	1	2.4025	1.55	1.55	2.4025	0.416233	2.4025
	0.25	3	0	1.55	1	0.416233	2.4025	0.416233	0.416233	0.645161
	0.25	3	1	2.4025	1.55	1	1.55	2.4025	0.416233	2.4025
	0.25	3	0	1.55	0.416233	0.645161	1	0.416233	2.4025	2.4025
	0.25	3	0	0.645161	2.4025	1.55	1	0.416233	0.645161	0.645161
	0.25	3	1	1.55	2.4025	1.55	0.416233	1	0.416233	1.55
	0.25	3	0	1	1.55	2.4025	0.645161	0.416233	0.645161	0.645161
	0.25	3	1	0.645161	1	0.416233	1	2.4025	0.416233	2.4025
	0.25	3	1	0.416233	1	1	1	1	0.645161	0.645161
	0.25	3	1	2.4025	2.4025	2.4025	0.645161	1	1.55	1
	0.25	3	0	2.4025	2.4025	0.416233	0.416233	1.55	1	0.416233
	0.25	3	1	1.55	1.55	2.4025	0.645161	0.416233	2.4025	0.645161
	0.25	3	0	0.645161	0.416233	1	2.4025	0.416233	0.645161	1.55
	0.25	3	1	2.4025	0.645161	0.645161	0.416233	1	2.4025	1.55
	0.25	3	0	0.416233	1.55	0.416233	0.416233	0.416233	1.55	0.416233
	0.25	3	1	0.416233	1	1	0.645161	0.416233	1.55	1
	0.25	3	1	0.416233	1	0.416233	2.4025	1	2.4025	1.55
	0.25	3	1	0.416233	0.416233	2.4025	2.4025	1.55	1	1
	0.25	3	0	0.645161	0.645161	1	0.416233	1	1	0.416233
	0.25	3	1	0.416233	0.416233	2.4025	0.416233	2.4025	2.4025	1
	0.25	3	0	0.645161	1	1.55	0.416233	1	0.416233	0.645161
	0.25	3	1	1.55	0.645161	1	1	0.416233	2.4025	1.55
	0.25	3	1	2.4025	1.55	1	0.416233	0.645161	1	2.4025
	0.25	3	1	1.55	0.645161	0.416233	1.55	1	1	2.4025
	0.25	3	1	0.416233	0.645161	0.645161	1	1	0.645161	1
	0.25	3	0	2.4025	1	0.416233	0.645161	2.4025	0.416233	2.4025
	0.25	3	0	1.55	1	1.55	1.55	0.645161	1	0.645161
	0.25	3	1	1.55	0.645161	0.645161	0.645161	0.416233	2.4025	1
	0.25	3	1	1	1.55	1.55	2.4025	1	1.55	0.645161
	0.25	3	1	2.4025	0.416233	1.55	2.4025	2.4025	1.55	1
	0.25	3	0	1.55	1.55	1.55	0.416233	1	2.4025	2.4025
	0.25	3	1	2.4025	1	2.4025	0.416233	1.55	2.4025	0.416233
	0.25	3	1	0.416233	2.4025	2.4025	0.645161	0.645161	2.4025	1.55
	0.25	3	1	0.416233	0.416233	0.416233	0.645161	2.4025	0.416233	2.4025
	0.25	3	1	2.4025	0.416233	0.645161	2.4025	0.645161	0.645161	2.4025
	0.25	3	0	0.645161	1.55	2.4025	2.4025	0.416233	0.416233	1
	0.25	3	0	1.55	2.4025	1.55	1.55	0.416233	2.4025	1.55
	0.25	3	1	0.645161	1.55	0.416233	1	1	0.645161	0.645161
	0.25	3	0	2.4025	0.416233	1.55	2.4025	1.55	0.645161	0.416233
	0.25	3	0	1	1.55	0.645161	0.645161	1	0.416233	0.645161
	0.25	3	0	0.416233	0.645161	1.55	0.645161	0.645161	0.416233	0.645161
	0.25	3	1	2.4025	1.55	1.55	0.416233	1.55	0.645161	2.4025
	0.25	3	1	2.4025	0.645161	2.4025	0.645161	0.645161	1.55	1
	0.25	3	1	0.645161	0.645161	1	2.4025	2.4025	1.55	0.416233
	0.25	3	1	1	2.4025	1	2.4025	1.55	1.55	0.416233
	0.25	3	0	1	0.416233	1	1	2.4025	0.645161	1
	0.25	3	0	2.4025	2.4025	2.4025	1	0.416233	1.55	0.645161
	0.25	3	0	1.55	0.416233	0.645161	1.55	1	0.416233	0.645161
	0.25	3	1	0.645161	1.55	2.4025	1	0.645161	2.4025	1.55
	0.25	3	0	2.4025	2.4025	1	1.55	1.55	1	1.55
	0.25	3	0	0.645161	1.55	1.55	1.55	0.416233	0.645161	1.55
	0.25	3	0	1.55	1	2.4025	1.55	1.55	1	2.4025
	0.25	3	0	0.416233	2.4025	0.416233	0.416233	0.645161	0.416233	0.645161
	0.25	3	0	1	0.645161	0.645161	0.416233	0.416233	1	2.4025
	0.25	3	0	1.55	0.645161	1	0.416233	1	0.416233	0.645161
	0.25	3	0	2.4025	1.55	0.416233	1.55	1	1	1.55
	0.25	3	1	0.416233	1	2.4025	2.4025	2.4025	1	1.55
	0.25	3	1	2.4025	0.645161	0.416233	1.55	1	0.645161	1.55
	0.25	3	1	0.416233	1.55	1.55	0.416233	0.416233	0.416233	1.55
	0.25	3	1	1.55	1.55	1.55	2.4025	1.55	1.55	0.645161
	0.25	3	0	0.416233	0.416233	2.4025	0.416233	1.55	0.416233	0.416233
	0.25	3	1	1	2.4025	0.645161	1.55	0.645161	1	0.645161
	0.25	3	1	1	1.55	0.645161	1	2.4025	0.416233	2.4025
	0.25	3	0	1.55	2.4025	0.645161	0.645161	1.55	0.645161	2.4025
	0.25	3	1	1.55	1.55	1.55	1.55	0.645161	2.4025	0.416233
	0.25	3	1	0.416233	1.55	2.4025	2.4025	2.4025	1.55	1
	0.25	3	1	1.55	1	0.645161	1	1	2.4025	1
	0.25	3	1	0.645161	2.4025	0.645161	0.645161	0.645161	2.4025	0.416233
	0.25	3	1	2.4025	1	1.55	0.416233	1	2.4025	1.55
	0.25	3	0	1.55	1.55	1.55	2.4025	1	1.55	2.4025
	0.25	3	1	1	0.416233	2.4025	0.416233	1.55	1	0.645161
	0.25	3	1	1	1.55	0.645161	1.55	1.55	1.55	1
	0.25	3	0	1	2.4025	2.4025	2.4025	1	0.416233	2.4025
	0.25	3	1	0.645161	0.645161	1	2.4025	0.416233	0.645161	2.4025
	0.25	3	1	0.416233	1	1	1.55	1	0.645161	2.4025
	0.25	3	0	2.4025	0.416233	0.645161	1.55	2.4025	1	1
	0.25	3	1	1.55	0.416233	0.645161	2.4025	1	2.4025	1.55
	0.25	3	1	2.4025	1	1.55	1	1.55	0.416233	1
	0.25	3	1	1	0.645161	0.416233	0.645161	1.55	2.4025	1
	0.25	3	1	0.645161	0.416233	0.416233	1.55	1.55	0.645161	2.4025
	0.25	3	1	2.4025	1	1.55	1.55	1	1	1.55
	0.25	3	1	0.645161	0.416233	2.4025	1.55	0.416233	0.645161	0.645161
	0.25	3	1	2.4025	1.55	0.416233	0.416233	0.645161	2.4025	2.4025
	0.25	3	0	2.4025	1.55	0.416233	1	2.4025	0.645161	2.4025
	0.25	3	1	1.55	1.55	0.645161	2.4025	1	0.645161	1
	0.25	3	1	2.4025	0.645161	1	0.416233	0.416233	2.4025	1
	0.25	3	0	1	1.55	0.645161	0.645161	1	2.4025	0.645161
	0.25	3	1	1	1.55	0.416233	1	1.55	1.55	0.416233
	0.25	3	1	2.4025	1	2.4025	0.645161	2.4025	2.4025	1.55
	0.25	3	1	0.416233	0.416233	0.645161	2.4025	1.55	1	1.55
	0.25	3	1	1.55	2.4025	0.416233	0.645161	0.416233	1	0.416233
	0.25	3	1	1.55	0.416233	0.645161	0.645161	2.4025	2.4025	1.55
	0.25	3	0	2.4025	1.55	1.55	2.4025	0.645161	1	1.55
	0.25	3	1	1.55	0.645161	1	0.416233	1.55	0.645161	0.645161
	0.25	3	1	1	0.416233	1.55	1.55	1.55	1	2.4025
	0.25	3	1	0.416233	1	0.416233	1.55	1	1	1.55
	0.25	3	1	0.416233	2.4025	1	0.645161	2.4025	0.416233	2.4025
	0.25	3	1	1	2.4025	0.645161	1	0.416233	0.645161	1
	0.25	3	1	0.645161	0.645161	0.416233	0.416233	0.416233	1	0.645161
	0.25	3	1	2.4025	2.4025	0.645161	0.645161	2.4025	1	2.4025
	0.25	3	0	0.645161	1.55	1	0.645161	1	1.55	1.55
	0.25	3	0	0.645161	0.416233	1.55	1.55	0.416233	0.416233	1.55
	0.25	3	1	0.416233	1	0.416233	0.645161	0.416233	0.645161	0.416233
	0.25	3	0	0.645161	1	0.416233	1	1	1.55	0.416233
	0.25	3	0	0.416233	0.645161	1	0.416233	2.4025	1	0.416233
	0.25	3	1	0.416233	1.55	2.4025	2.4025	0.416233	2.4025	2.4025
	0.25	3	1	2.4025	2.4025	1	0.645161	0.416233	1.55	2.4025
	0.25	3	1	1	1	0.645161	0.416233	1	0.645161	0.416233
	0.25	3	1	2.4025	0.416233	2.4025	0.416233	1.55	2.4025	1
	0.25	3	0	0.416233	1.55	0.645161	0.416233	0.416233	0.645161	0.645161
	0.25	3	1	1.55	2.4025	2.4025	0.416233	0.645161	0.645161	1.55
	0.25	3	1	0.645161	1	0.645161	1.55	0.416233	0.416233	1
	0.25	3	1	0.416233	2.4025	2.4025	2.4025	1.55	1.55	0.645161
	0.25	3	1	2.4025	2.4025	1.55	1.55	2.4025	2.4025	1
	0.25	3	0	0.645161	2.4025	0.416233	0.645161	0.645161	0.416233	2.4025
	0.25	3	1	2.4025	0.645161	0.645161	1	0.416233	0.645161	0.416233
	0.25	3	1	0.645161	1	2.4025	2.4025	0.416233	1.55	2.4025
	0.25	3	1	1.55	0.416233	1.55	2.4025	1	1	1
	0.25	3	0	0.645161	0.416233	1	0.416233	1.55	1	1.55
	0.25	3	1	1.55	2.4025	2.4025	1.55	2.4025	1	2.4025
	0.25	3	1	2.4025	2.4025	0.645161	1.55	0.645161	1	1.55
	0.25	3	0	0.416233	1.55	0.416233	1	1.55	0.416233	0.416233
	0.25	4	1	2.4025	2.4025	0.416233	0.645161	1.55	1.55	0.416233
	0.25	4	1	1	1	1	1	0.645161	0.416233	0.416233
	0.25	4	1	1	1	1	0.645161	1	1	0.416233
	0.25	4	0	2.4025	2.4025	0.645161	0.645161	0.645161	0.416233	1
	0.25	4	1	0.416233	1	2.4025	0.416233	1.55	0.416233	0.416233
	0.25	4	1	0.645161	2.4025	1.55	1	0.645161	2.4025	1
	0.25	4	0	1.55	0.645161	1.55	0.645161	1.55	0.645161	2.4025
	0.25	4	1	0.645161	1.55	0.645161	1.55	0.645161	2.4025	1
	0.25	4	1	2.4025	2.4025	2.4025	2.4025	1.55	1.55	0.416233
	0.25	4	0	0.645161	0.645161	2.4025	1	0.645161	1.55	1.55
	0.25	4	1	0.645161	1	1.55	1	2.4025	1.55	0.416233
	0.25	4	0	0.416233	1.55	0.645161	0.416233	0.645161	2.4025	0.645161
	0.25	4	0	1.55	1	0.416233	1.55	0.645161	1.55	1.55
	0.25	4	0	0.645161	1.55	2.4025	0.416233	0.416233	1.55	1
	0.25	4	1	2.4025	1	1	0.416233	0.416233	2.4025	1
	0.25	4	1	0.416233	2.4025	1	1.55	2.4025	2.4025	1.55
	0.25	4	0	1.55	0.416233	0.645161	0.645161	0.645161	1.55	1
	0.25	4	0	2.4025	0.645161	1.55	0.416233	1	1	0.416233
	0.25	4	0	1.55	0.645161	1.55	1	0.416233	0.645161	0.416233
	0.25	4	1	1	0.416233	1	0.645161	1.55	0.645161	1.55
	0.25	4	1	0.416233	0.416233	1	0.645161	2.4025	0.645161	1
	0.25	4	1	1.55	2.4025	2.4025	1	2.4025	1.55	1.55
	0.25	4	1	1	0.645161	1.55	1	0.645161	1.55	1.55
	0.25	4	1	2.4025	0.416233	1.55	0.416233	2.4025	2.4025	0.416233
	0.25	4	1	2.4025	0.416233	1	1	0.645161	0.416233	1.55
	0.25	4	1	0.645161	1.55	2.4025	1.55	1	1	1
	0.25	4	1	0.416233	0.645161	0.645161	1	2.4025	0.416233	1
	0.25	4	1	1.55	2.4025	2.4025	0.645161	1.55	2.4025	0.416233
	0.25	4	0	1	0.416233	0.645161	0.416233	0.416233	2.4025	1.55
	0.25	4	1	1	0.416233	0.645161	0.416233	1.55	1	0.645161
	0.25	4	0	0.645161	2.4025	0.645161	2.4025	0.416233	1	1.55
	0.25	4	1	0.645161	2.4025	0.645161	1.55	1	0.416233	2.4025
	0.25	4	1	1.55	0.416233	0.416233	0.416233	0.645161	1	2.4025
	0.25	4	1	2.4025	1	1.55	0.645161	1.55	0.416233	1.55
	0.25	4	0	1.55	1.55	2.4025	2.4025	0.416233	1.55	0.416233
	0.25	4	0	1	0.416233	2.4025	1	1.55	2.4025	2.4025
	0.25	4	0	0.645161	1	1	0.645161	2.4025	2.4025	2.4025
	0.25	4	1	2.4025	0.645161	1	1.55	0.416233	0.645161	1
	0.25	4	1	1	0.645161	0.416233	1	0.416233	0.645161	0.645161
	0.25	4	0	0.645161	2.4025	1.55	0.645161	1	0.645161	1.55
	0.25	4	0	0.416233	0.645161	0.416233	0.416233	0.416233	2.4025	0.416233
	0.25	4	0	0.645161	1	0.645161	1	0.645161	1	1.55
	0.25	4	1	1.55	2.4025	2.4025	1	0.645161	2.4025	0.645161
	0.25	4	0	1	1.55	1	0.416233	0.645161	0.645161	0.645161
	0.25	4	1	1.55	2.4025	0.416233	2.4025	1.55	2.4025	0.416233
	0.25	4	0	1	1	1	1	1	2.4025	1
	0.25	4	1	1	1.55	0.416233	0.416233	0.416233	0.416233	0.416233
	0.25	4	0	1.55	0.645161	0.416233	2.4025	1.55	1.55	0.416233
	0.25	4	1	1.55	2.4025	0.416233	1.55	1	1	1
	0.25	4	1	0.645161	2.4025	2.4025	2.4025	0.645161	1.55	0.416233
	0.25	4	1	0.416233	2.4025	1.55	1	1.55	0.416233	1.55
	0.25	4	1	0.416233	0.416233	0.416233	1	2.4025	1	2.4025
	0.25	4	1	1.55	0.645161	0.416233	0.416233	2.4025	1	1.55
	0.25	4	0	0.645161	1.55	2.4025	0.416233	2.4025	1.55	0.645161
	0.25	4	1	2.4025	1	1	2.4025	0.645161	1	0.645161
	0.25	4	0	1	1.55	2.4025	0.645161	2.4025	1	1.55
	0.25	4	1	0.416233	0.416233	1.55	2.4025	1.55	1.55	0.645161
	0.25	4	1	2.4025	0.645161	1	2.4025	2.4025	0.645161	2.4025
	0.25	4	1	1	1	0.416233	1	2.4025	2.4025	0.416233
	0.25	4	1	2.4025	0.645161	0.416233	1	0.416233	1.55	1
	0.25	4	0	1	0.416233	0.645161	0.416233	0.416233	0.416233	0.416233
	0.25	4	1	1.55	0.416233	2.4025	1.55	1	0.645161	1.55
	0.25	4	0	1	0.416233	0.416233	1.55	2.4025	1.55	0.645161
	0.25	4	1	2.4025	1.55	2.4025	0.645161	1	2.4025	0.645161
	0.25	4	0	0.416233	0.645161	2.4025	0.645161	0.416233	0.416233	2.4025
	0.25	4	0	2.4025	0.645161	0.416233	0.645161	0.416233	1.55	1
	0.25	4	1	1	1	1	2.4025	1	1.55	1
	0.25	4	1	1	2.4025	1.55	0.416233	1	1	1.55
	0.25	4	1	1	0.416233	1	2.4025	0.645161	1.55	0.645161
	0.25	4	1	0.645161	2.4025	0.645161	0.416233	1	0.645161	1.55
	0.25	4	1	1.55	1.55	0.645161	1.55	1.55	0.416233	2.4025
	0.25	4	1	2.4025	0.416233	0.645161	1	1.55	1	1
	0.25	4	0	1	1	0.416233	1	1.55	0.416233	0.645161
	0.25	4	0	1.55	0.645161	2.4025	0.645161	1.55	1	1
	0.25	4	1	0.645161	1	1	0.645161	1.55	1	1.55
	0.25	4	1	0.416233	1.55	1	1.55	1.55	1	1
	0.25	4	1	0.645161	0.645161	0.416233	1.55	2.4025	2.4025	0.645161
	0.25	4	1	1	1.55	2.4025	2.4025	2.4025	2.4025	2.4025
	0.25	4	1	0.645161	1	2.4025	1	1	0.416233	1.55
	0.25	4	1	0.416233	0.645161	2.4025	1	0.645161	2.4025	0.416233
	0.25	4	0	2.4025	0.416233	2.4025	2.4025	0.645161	0.645161	2.4025
	0.25	4	1	1.55	0.645161	0.416233	0.416233	0.416233	1	0.416233
	0.25	4	1	0.416233	1	1.55	1.55	1.55	0.645161	1
	0.25	4	0	2.4025	0.416233	0.416233	1	1	1	2.4025
	0.25	4	0	1.55	0.645161	1	1	0.645161	0.416233	1.55
	0.25	4	1	0.416233	0.416233	2.4025	0.416233	0.416233	1.55	2.4025
	0.25	4	1	1.55	0.416233	0.645161	0.416233	0.645161	2.4025	0.645161
	0.25	4	1	0.645161	2.4025	2.4025	2.4025	1	0.645161	2.4025
	0.25	4	0	1	1	2.4025	0.416233	0.416233	2.4025	2.4025
	0.25	4	0	1	1.55	2.4025	0.645161	1	1	0.645161
	0.25	4	0	2.4025	1	0.645161	0.645161	0.645161	1	0.645161
	0.25	4	1	1	2.4025	1	0.416233	2.4025	0.645161	1
	0.25	4	0	0.645161	0.416233	2.4025	2.4025	2.4025	0.645161	1.55
	0.25	4	1	0.645161	0.645161	0.416233	0.416233	1.55	0.416233	2.4025
	0.25	4	0	2.4025	2.4025	0.416233	2.4025	1.55	1	0.645161
	0.25	4	0	1.55	1.55	2.4025	2.4025	0.416233	1	0.645161
	0.25	4	1	2.4025	1	2.4025	1	2.4025	0.416233	0.416233
	0.25	4	1	1.55	2.4025	1.55	0.645161	0.645161	2.4025	2.4025
	0.25	4	1	1	1	1.55	1	1	1.55	1.55
	0.25	4	1	0.416233	1	0.416233	2.4025	0.416233	2.4025	0.645161
	0.25	4	1	0.416233	0.645161	2.4025	2.4025	1	2.4025	0.645161
	0.25	4	1	0.416233	0.416233	1.55	0.416233	1	1	2.4025
	0.25	4	0	0.416233	0.416233	1	2.4025	1	0.416233	0.645161
	0.25	4	0	1.55	1	1	1.55	2.4025	1	2.4025
	0.25	4	0	0.645161	0.416233	0.416233	0.416233	0.416233	2.4025	0.416233
	0.25	4	1	0.645161	1	1.55	1	2.4025	0.645161	0.416233
	0.25	4	1	0.645161	1	0.416233	0.416233	2.4025	1.55	0.645161
	0.25	4	0	2.4025	1.55	0.645161	0.645161	1.55	2.4025	1
	0.25	4	1	2.4025	1.55	2.4025	0.416233	1	2.4025	0.416233
	0.25	4	1	1.55	1.55	2.4025	0.416233	2.4025	0.416233	1.55
	0.25	4	0	2.4025	0.645161	1	1.55	1	1.55	2.4025
	0.25	4	1	2.4025	1	0.416233	1.55	0.645161	0.645161	1.55
	0.25	4	1	2.4025	1	1	1	1	1.55	1.55
	0.25	4	1	0.645161	0.645161	2.4025	1	2.4025	1.55	0.645161
	0.25	4	1	2.4025	1	1	0.645161	0.645161	2.4025	0.645161
	0.25	4	1	1	2.4025	1.55	0.416233	1.55	0.645161	0.416233
	0.25	4	0	0.416233	1.55	2.4025	0.416233	1.55	0.645161	1
	0.25	4	1	2.4025	1	0.416233	0.645161	0.645161	2.4025	0.645161
	0.25	4	0	0.416233	0.645161	0.416233	1	1	1.55	0.645161
	0.25	4	1	0.416233	0.645161	0.416233	1.55	2.4025	1.55	0.416233
	0.25	4	0	1	0.416233	1.55	0.645161	0.416233	1	1
	0.25	4	1	1	0.645161	0.416233	2.4025	0.645161	2.4025	1
	0.25	4	1	1	2.4025	0.645161	2.4025	0.416233	1.55	2.4025
	0.25	4	1	1	1	1	2.4025	1.55	0.645161	1
	0.25	4	1	0.416233	1.55	0.645161	0.416233	1	2.4025	0.416233
	0.25	4	1	0.416233	1	0.645161	1.55	0.645161	1	0.416233
	0.25	4	1	0.645161	1	0.645161	2.4025	0.416233	0.645161	1
	0.25	4	1	0.416233	1	0.645161	1.55	0.645161	1	0.645161
	0.25	4	0	1	0.645161	1.55	0.416233	1.55	1.55	1.55
	0.25	4	1	0.645161	1	0.645161	2.4025	1	0.416233	2.4025
	0.25	4	1	0.416233	1.55	0.645161	1.55	1.55	1.55	1.55
	0.25	4	0	0.416233	0.416233	0.416233	0.645161	1	1	0.645161
	0.25	4	1	0.416233	0.416233	2.4025	2.4025	1	0.645161	2.4025
	0.25	4	1	1.55	1.55	0.645161	1	0.416233	1.55	1
	0.25	4	1	1	0.645161	0.416233	0.416233	0.645161	2.4025	1
	0.25	4	0	1.55	1.55	1.55	0.416233	1.55	1	0.416233
	0.25	4	1	2.4025	1.55	2.4025	0.416233	1	2.4025	1.55
	0.25	4	1	1	2.4025	0.645161	0.645161	2.4025	0.645161	0.645161
	0.25	4	1	1	1	0.416233	0.645161	2.4025	0.416233	2.4025
	0.25	4	1	0.645161	1	0.645161	2.4025	2.4025	0.416233	1
	0.25	4	0	0.645161	0.416233	1.55	0.645161	1	2.4025	2.4025
	0.25	4	1	1.55	1.55	1.55	0.645161	1.55	2.4025	1
	0.25	4	1	0.416233	1	1	0.416233	0.645161	2.4025	2.4025
	0.25	4	1	1	2.4025	0.645161	2.4025	1.55	0.645161	0.645161
	0.25	4	1	1.55	1	1.55	0.416233	2.4025	1.55	1.55
	0.25	4	0	1.55	1.55	2.4025	0.645161	1.55	1	0.645161
	0.25	4	0	0.645161	0.416233	1	0.645161	1.55	0.645161	2.4025
	0.25	4	1	1	0.645161	1.55	2.4025	2.4025	1.55	1
	0.25	4	1	2.4025	0.416233	0.416233	2.4025	0.645161	2.4025	0.416233
	0.25	4	1	2.4025	2.4025	0.416233	0.416233	1	2.4025	1.55
	0.25	4	1	1	1.55	0.645161	0.416233	2.4025	2.4025	0.416233
	0.25	4	1	1	1	1.55	0.416233	1.55	2.4025	0.645161
	0.25	4	0	0.416233	1	0.416233	2.4025	1	0.645161	2.4025
	0.25	4	1	0.416233	1.55	1	0.645161	1	1.55	0.645161
	0.25	4	1	0.645161	1	1	0.416233	0.416233	0.416233	2.4025
	0.25	4	0	0.416233	0.645161	1	0.645161	0.645161	0.416233	2.4025
	0.25	4	0	0.645161	1	0.645161	2.4025	1.55	2.4025	1.55
	0.25	4	0	0.416233	0.645161	0.416233	2.4025	1.55	1.55	0.416233
	0.25	4	1	0.645161	1	1.55	0.645161	0.416233	1.55	0.416233
	0.25	4	1	0.416233	1	2.4025	0.645161	0.416233	2.4025	1.55
	0.25	4	1	0.645161	2.4025	1.55	0.416233	1.55	2.4025	1
	0.25	4	1	1.55	2.4025	0.416233	0.416233	1.55	1.55	2.4025
	0.25	4	0	0.645161	0.645161	2.4025	0.645161	1	2.4025	1
	0.25	4	1	2.4025	0.416233	2.4025	2.4025	0.416233	0.416233	1.55
	0.25	4	1	0.645161	1.55	1.55	0.416233	0.645161	1.55	2.4025
	0.25	4	1	0.416233	1.55	1.55	1.55	0.416233	1.55	0.416233
	0.25	4	1	0.645161	2.4025	1	0.645161	0.645161	0.645161	1.55
	0.25	4	0	1	1	1	0.645161	0.645161	0.416233	1
	0.25	4	1	2.4025	1	2.4025	0.416233	0.645161	1	1.55
	0.25	4	1	1	1.55	2.4025	1.55	0.416233	0.645161	0.645161
	0.25	4	1	1	0.416233	2.4025	1	0.645161	2.4025	1
	0.25	4	1	1.55	0.416233	1.55	0.645161	1	1	0.645161
	0.25	4	1	1	1.55	2.4025	0.416233	1.55	1	2.4025
	0.25	4	0	0.645161	1.55	1	0.645161	0.645161	0.416233	1.55
	0.25	4	0	2.4025	0.416233	2.4025	1.55	1	0.645161	0.416233
	0.25	4	1	2.4025	1	0.645161	0.416233	2.4025	2.4025	0.645161
	0.25	4	1	2.4025	0.645161	0.645161	2.4025	1.55	0.645161	1
	0.25	4	1	2.4025	0.416233	1	0.645161	1	2.4025	1
	0.25	4	0	1	1	1.55	1	0.645161	0.416233	1
	0.25	4	1	2.4025	0.416233	1.55	1.55	1	0.645161	1
	0.25	4	1	0.645161	0.416233	1.55	0.416233	0.416233	1.55	1.55
	0.25	4	1	0.645161	2.4025	1	2.4025	1	1	0.645161
	0.25	4	0	0.645161	0.645161	2.4025	1.55	0.416233	0.645161	2.4025
	0.25	4	0	0.416233	0.645161	2.4025	2.4025	0.645161	1	2.4025
	0.25	4	1	1	2.4025	0.416233	2.4025	0.416233	0.416233	0.416233
	0.25	4	0	0.645161	1	2.4025	2.4025	0.645161	2.4025	2.4025
	0.25	4	1	1	1.55	0.416233	1.55	1	1	1
	0.25	4	1	1.55	2.4025	0.416233	1.55	2.4025	2.4025	0.645161
	0.25	4	0	1	2.4025	1.55	1.55	2.4025	0.645161	0.645161
	0.25	4	1	0.645161	0.416233	0.645161	2.4025	1.55	1	1.55
	0.25	4	0	2.4025	2.4025	2.4025	1.55	1.55	1	0.645161
	0.25	4	0	0.416233	0.645161	0.416233	1.55	1	0.645161	2.4025
	0.25	4	1	2.4025	1.55	0.645161	0.645161	2.4025	2.4025	0.645161
	0.25	4	1	1	0.416233	0.645161	0.645161	1.55	2.4025	1
	0.25	4	0	2.4025	1	0.645161	0.645161	0.645161	1	0.416233
	0.25	4	1	1	0.645161	1	1.55	0.416233	2.4025	2.4025
	0.25	4	1	1.55	2.4025	0.645161	0.416233	2.4025	2.4025	2.4025
	0.25	4	1	0.645161	0.645161	2.4025	0.645161	2.4025	1	1
	0.25	4	1	2.4025	2.4025	1	1	2.4025	2.4025	2.4025
	0.25	4	1	0.645161	0.416233	0.416233	1	0.416233	0.416233	2.4025
	0.25	4	0	2.4025	0.416233	0.416233	1	1	0.645161	1.55
	0.25	4	0	0.645161	0.645161	0.416233	0.645161	0.645161	0.416233	0.645161
	0.25	4	1	1	2.4025	0.416233	1.55	1.55	2.4025	1
	0.25	4	1	1.55	0.416233	0.645161	1	1	0.416233	0.416233
	0.25	4	1	1	1.55	0.645161	2.4025	1.55	1	0.416233
	0.25	4	1	1.55	1.55	0.645161	1	1.55	0.645161	2.4025
	0.25	4	1	2.4025	0.645161	2.4025	1.55	2.4025	0.416233	0.645161
	0.25	4	1	0.416233	2.4025	1.55	1	1	2.4025	1.55
	0.25	4	1	0.416233	1.55	0.416233	2.4025	1	1.55	0.416233
	0.25	4	0	0.416233	1.55	0.645161	0.645161	0.416233	1	0.416233
	0.25	4	0	1	1.55	2.4025	1	1	0.645161	1
	0.25	4	1	1.55	0.416233	1	1.55	2.4025	2.4025	0.416233
	0.25	4	1	0.416233	1	0.416233	1	0.416233	2.4025	1.55
	0.25	4	0	0.645161	0.416233	1.55	1	0.416233	0.645161	1.55
	0.25	4	0	2.4025	1	0.416233	0.416233	1.55	1	0.416233
	0.25	4	1	1	1.55	1.55	2.4025	2.4025	1.55	0.416233
	0.25	4	1	1	2.4025	0.416233	0.645161	0.416233	1	1
	0.25	4	1	2.4025	2.4025	1.55	1.55	0.416233	1.55	1
	0.25	4	0	0.645161	1	1	2.4025	0.645161	0.645161	0.645161
	0.25	4	0	0.645161	2.4025	0.645161	0.416233	0.645161	1	1
	0.25	4	0	0.645161	1.55	2.4025	2.4025	0.645161	1.55	2.4025
	0.25	4	0	0.416233	1.55	1	0.645161	2.4025	1.55	1
	0.25	4	0	0.645161	0.416233	0.645161	0.645161	0.645161	2.4025	1.55
	0.25	4	1	2.4025	1.55	1.55	1.55	1.55	2.4025	1
	0.25	4	0	0.416233	2.4025	2.4025	0.645161	1.55	1	1.55
	0.25	4	1	1.55	1.55	0.645161	1.55	0.645161	1.55	0.416233
	0.25	4	1	1.55	0.416233	1.55	1.55	0.645161	1.55	2.4025
	0.25	4	0	0.645161	1.55	0.645161	1	1.55	2.4025	0.645161
	0.25	4	1	2.4025	1.55	0.416233	0.416233	0.645161	0.416233	0.416233
	0.25	4	0	0.645161	0.645161	1.55	1	1	1	2.4025
	0.25	4	1	2.4025	0.416233	0.416233	2.4025	1	1.55	0.645161
	0.25	4	1	1	0.645161	1.55	1.55	1.55	0.645161	2.4025
	0.25	4	0	0.416233	1	0.645161	1.55	1	0.416233	0.645161
	0.25	4	0	1	0.416233	1	0.416233	1	1	2.4025
	0.25	4	0	0.416233	2.4025	1	1	0.645161	0.645161	1
	0.25	4	1	2.4025	1	1	0.416233	2.4025	2.4025	0.645161
	0.25	4	0	0.645161	2.4025	0.416233	1	1	1.55	0.645161
	0.25	4	0	1	0.645161	0.645161	1.55	1	0.416233	0.645161
	0.25	4	1	0.645161	2.4025	2.4025	2.4025	1	0.645161	0.645161
	0.25	4	1	1.55	2.4025	1	2.4025	0.416233	1	0.645161
	0.25	4	0	0.645161	1	1.55	1	0.416233	1	0.416233
	0.25	4	1	1	0.416233	0.645161	0.645161	0.416233	1.55	2.4025
	0.25	4	0	0.416233	0.645161	0.645161	1.55	0.645161	0.645161	0.645161
	0.25	4	1	1	2.4025	2.4025	2.4025	1.55	2.4025	1.55
	0.25	4	0	1.55	1.55	1.55	0.416233	1	1	1
	0.25	4	0	1	0.645161	0.645161	0.645161	0.645161	1.55	2.4025
	0.25	4	1	0.645161	0.416233	0.416233	1.55	1.55	1	1
	0.25	4	1	2.4025	2.4025	2.4025	2.4025	1.55	1.55	1.55
	0.25	4	1	1.55	1	1.55	0.645161	2.4025	0.645161	1
	0.25	4	1	1	1.55	1	0.645161	2.4025	0.416233	0.416233
	0.25	4	1	0.645161	1	1.55	2.4025	1.55	0.416233	1
	0.25	4	1	0.645161	0.645161	1.55	0.645161	0.645161	1.55	1.55
	0.25	4	1	0.645161	1	0.645161	0.645161	0.416233	2.4025	1.55
	0.25	4	1	1.55	2.4025	1.55	0.645161	2.4025	1.55	1
	0.25	4	0	1	1.55	0.416233	0.416233	1.55	0.645161	0.416233
	0.25	4	1	0.416233	1	2.4025	2.4025	1	0.645161	1
	0.25	4	1	0.645161	0.416233	1	2.4025	0.416233	1.55	0.416233
	0.25	4	1	0.645161	1	2.4025	1.55	0.645161	0.645161	0.645161
	0.25	4	1	1.55	0.416233	1	0.645161	1.55	0.416233	2.4025
	0.25	4	1	1.55	0.416233	0.645161	0.416233	1	1.55	2.4025
	0.25	4	1	0.645161	1.55	1.55	1	2.4025	0.416233	2.4025
	0.25	4	1	0.645161	2.4025	1.55	0.416233	2.4025	1.55	1
	0.25	4	1	1	1	0.416233	1	0.645161	0.645161	2.4025
	0.25	4	1	1.55	1	1.55	0.416233	0.645161	1.55	1
	0.25	4	0	1.55	2.4025	1	0.645161	1.55	2.4025	1
	0.25	4	0	1	0.645161	0.416233	1.55	1.55	1.55	0.645161
	0.25	4	0	0.416233	2.4025	0.645161	2.4025	0.416233	2.4025	2.4025
	0.25	4	1	0.645161	1.55	0.416233	2.4025	1.55	0.416233	1.55
	0.25	4	1	0.416233	2.4025	2.4025	1	2.4025	0.416233	0.645161
	0.25	4	1	1	1.55	1	0.416233	0.416233	0.416233	0.416233
	0.25	4	1	0.416233	0.645161	1	0.645161	2.4025	0.416233	2.4025
	0.25	4	1	1.55	0.416233	2.4025	2.4025	1.55	2.4025	2.4025
	0.25	4	1	1	1.55	1.55	2.4025	1	1.55	0.416233
	0.25	4	1	0.416233	0.645161	0.645161	1	0.645161	1	0.416233
	0.25	4	1	2.4025	1.55	1	1	2.4025	0.416233	0.645161
	0.25	4	1	1	0.645161	2.4025	1	0.416233	2.4025	1
	0.25	4	1	0.416233	0.416233	1	1.55	2.4025	2.4025	0.416233
	0.25	4	0	0.416233	2.4025	0.416233	0.416233	0.416233	1	2.4025
	0.25	4	0	1.55	0.645161	0.416233	0.645161	0.645161	2.4025	0.645161
	0.25	4	1	1.55	0.416233	1	0.416233	1.55	1	0.416233
	0.25	4	0	0.645161	1.55	2.4025	1	0.416233	0.416233	0.416233
	0.25	4	0	0.645161	0.416233	1.55	1	0.416233	1.55	1
	0.25	4	0	1	1.55	0.645161	0.416233	2.4025	0.416233	0.416233
	0.25	4	1	0.645161	0.645161	2.4025	1	1.55	1.55	1
	0.25	4	0	0.416233	2.4025	1.55	0.416233	0.416233	0.645161	2.4025
	0.25	4	1	0.416233	1.55	0.416233	0.416233	2.4025	1	0.416233
	0.25	4	0	2.4025	0.416233	0.645161	1.55	2.4025	1.55	1
	0.25	4	1	1	0.416233	0.416233	0.645161	2.4025	2.4025	0.645161
	0.25	4	0	1	0.645161	1.55	1	1	2.4025	1
	0.25	4	0	0.416233	0.416233	1	2.4025	2.4025	1	0.416233
	0.25	4	1	0.645161	2.4025	1.55	1.55	1	0.416233	1
	0.25	4	0	0.645161	2.4025	0.416233	2.4025	1	1	2.4025
	0.25	4	1	2.4025	1	1.55	0.645161	0.645161	1.55	0.645161
	0.25	4	1	0.416233	0.416233	1.55	0.416233	1	1.55	2.4025
	0.25	4	1	1.55	1.55	0.645161	0.416233	2.4025	1	1
	0.25	4	1	0.416233	1.55	2.4025	2.4025	2.4025	1.55	1
	0.25	4	1	0.416233	2.4025	1.55	1.55	0.416233	0.416233	1.55
	0.25	4	1	1.55	0.645161	2.4025	1.55	1	1.55	0.645161
	0.25	4	1	1	1	2.4025	0.416233	0.416233	2.4025	1
	0.25	4	0	1	1	1.55	1	1	0.416233	1.55
	0.25	4	1	2.4025	2.4025	1	0.645161	0.645161	0.645161	1
	0.25	4	1	1.55	1.55	1	1	2.4025	0.416233	0.645161
	0.25	4	0	1	1.55	0.416233	1.55	2.4025	2.4025	0.416233
	0.25	4	0	1.55	2.4025	0.416233	1	0.416233	1	1
	0.25	4	1	1	1	1.55	2.4025	1.55	2.4025	1.55
	0.25	4	1	2.4025	0.645161	0.416233	0.416233	1	0.645161	1.55
	0.25	4	1	1.55	0.645161	0.645161	0.645161	1	0.416233	0.645161
	0.25	4	1	1	1.55	0.645161	1	2.4025	0.416233	1.55
	0.25	4	1	1.55	1.55	1.55	1	0.416233	0.416233	2.4025
	0.25	4	0	0.645161	0.416233	1.55	2.4025	2.4025	1.55	0.645161
	0.25	4	0	1.55	2.4025	1	0.645161	0.416233	0.416233	0.416233
	0.25	4	1	1.55	0.416233	1	2.4025	0.416233	1.55	1.55
	0.25	4	1	2.4025	0.416233	0.645161	2.4025	0.645161	1.55	1
	0.25	4	0	0.416233	1.55	0.416233	0.416233	0.645161	0.645161	1
	0.25	4	1	1.55	0.416233	0.416233	0.416233	0.645161	1	1.55
	0.25	4	1	1	1.55	1.55	0.645161	1.55	1.55	0.416233
	0.25	4	1	1.55	0.645161	0.416233	2.4025	0.416233	2.4025	1
	0.25	4	1	1.55	0.416233	2.4025	2.4025	0.416233	0.416233	1.55
	0.25	4	0	0.645161	0.645161	1.55	0.645161	0.645161	0.416233	2.4025
	0.25	4	0	1	0.645161	1.55	2.4025	0.416233	2.4025	0.645161
	0.25	4	1	1.55	1.55	1	0.645161	0.416233	2.4025	0.645161
	0.25	4	0	0.645161	0.416233	1.55	1.55	0.416233	0.645161	0.645161
	0.25	4	1	1	1.55	2.4025	0.645161	1	1	1.55
	0.25	4	0	0.645161	2.4025	1.55	1.55	1.55	2.4025	1.55
	0.25	4	0	0.645161	0.416233	2.4025	2.4025	0.416233	2.4025	1.55
	0.25	4	0	1.55	2.4025	1.55	0.645161	2.4025	1	1
	0.25	4	1	0.416233	1	1.55	0.645161	1	1	1.55
	0.25	4	0	1	2.4025	1	1	0.645161	0.416233	1.55
	0.25	4	1	0.645161	2.4025	1.55	0.645161	1.55	1.55	1
	0.25	4	0	0.416233	0.645161	1	0.645161	1	1	0.645161
	0.25	4	1	0.416233	2.4025	0.645161	1	2.4025	0.416233	1
	0.25	4	1	2.4025	0.645161	2.4025	0.416233	2.4025	1.55	2.4025
	0.25	4	1	1.55	1.55	0.416233	1.55	2.4025	0.645161	0.416233
	0.25	4	1	1.55	1.55	0.416233	1	1	0.645161	0.645161
	0.25	4	1	0.645161	1.55	1.55	1	2.4025	0.416233	1.55
	0.25	4	0	1.55	2.4025	1.55	0.645161	0.416233	0.645161	1
	0.25	4	1	0.645161	2.4025	0.645161	1	1	0.645161	1
	0.25	4	0	0.416233	2.4025	2.4025	0.416233	1	0.416233	0.645161
	0.25	4	1	1.55	1.55	0.645161	1	2.4025	0.416233	2.4025
	0.25	4	0	2.4025	0.645161	1	1.55	2.4025	0.645161	2.4025
	0.25	4	0	2.4025	1	1	0.416233	1	1	0.416233
	0.25	4	1	2.4025	1	2.4025	1	0.416233	1.55	2.4025
	0.25	4	1	1.55	2.4025	0.416233	2.4025	0.416233	1	0.645161
	0.25	4	1	0.416233	1.55	1.55	2.4025	2.4025	1	1.55
	0.25	4	1	0.416233	0.645161	1.55	0.416233	0.645161	2.4025	1
	0.25	4	1	1	1.55	0.416233	1.55	1	1.55	1
	0.25	4	1	2.4025	0.645161	2.4025	1.55	1.55	1.55	1.55
	0.25	4	0	1	0.645161	1.55	2.4025	0.416233	1.55	2.4025
	0.25	4	0	1	2.4025	1	0.645161	1	2.4025	2.4025
	0.25	4	0	1	1	0.416233	1.55	1.55	2.4025	2.4025
	0.25	4	1	1	2.4025	1	0.416233	1	0.645161	0.416233
	0.25	4	0	1	1.55	1.55	1.55	0.416233	0.645161	0.645161
	0.25	4	1	1	0.645161	0.645161	2.4025	1	2.4025	0.416233
	0.25	4	1	2.4025	0.416233	2.4025	2.4025	0.645161	2.4025	2.4025
	0.25	4	1	0.645161	1.55	0.416233	0.416233	2.4025	0.645161	0.416233
	0.25	4	1	1	2.4025	1	1	0.416233	1.55	2.4025
	0.25	4	1	0.416233	0.645161	0.416233	1	0.416233	1.55	2.4025
	0.25	4	1	0.645161	2.4025	0.645161	1.55	0.416233	2.4025	0.416233
	0.25	4	1	2.4025	0.416233	1.55	2.4025	0.416233	2.4025	1
	0.25	4	0	2.4025	0.645161	0.416233	1.55	2.4025	2.4025	1.55
	0.25	4	1	0.645161	0.645161	0.645161	1	0.416233	2.4025	2.4025
	0.25	4	1	1	0.416233	1	0.645161	1.55	0.645161	2.4025
	0.25	4	1	0.645161	2.4025	2.4025	2.4025	1	2.4025	1.55
	0.25	4	1	0.645161	1.55	0.416233	1.55	1.55	1	1
	0.25	4	1	1.55	0.416233	1	2.4025	2.4025	0.416233	1.55
	0.25	4	1	0.645161	2.4025	1	0.645161	1	0.416233	2.4025
	0.25	4	1	0.645161	1.55	0.416233	0.645161	0.416233	1.55	2.4025
	0.25	4	1	2.4025	1.55	0.645161	2.4025	0.416233	1	1.55
	0.25	4	0	1.55	0.645161	0.416233	2.4025	1	1	0.645161
	0.25	4	1	1.55	2.4025	2.4025	0.416233	1	1.55	0.645161
	0.25	4	1	2.4025	2.4025	2.4025	2.4025	0.645161	1	0.645161
	0.25	4	1	2.4025	1.55	1.55	0.416233	2.4025	0.416233	2.4025
	0.25	4	0	0.416233	0.645161	0.645161	1.55	1.55	1.55	1
	0.25	4	1	0.645161	2.4025	1	0.416233	1	0.416233	0.416233
	0.25	4	1	1	1	0.645161	1	0.645161	1	2.4025
	0.25	4	1	1	1	1.55	1	1	2.4025	0.645161
	0.25	4	1	1.55	0.416233	0.645161	0.645161	1	2.4025	0.645161
	0.25	4	0	0.416233	1	0.645161	1	0.645161	1.55	1
	0.25	4	1	2.4025	1	0.645161	0.416233	0.416233	0.645161	1.55
	0.25	4	1	0.416233	1	1.55	0.416233	2.4025	0.416233	0.416233
	0.25	4	1	1.55	1.55	0.416233	0.416233	0.416233	2.4025	0.416233
	0.25	4	1	1	1	0.645161	0.416233	1	0.416233	1.55
	0.25	4	1	0.416233	1	1.55	1.55	0.416233	0.416233	0.645161
	0.25	4	1	2.4025	0.645161	2.4025	0.645161	1	2.4025	0.645161
	0.25	4	0	1	0.416233	1.55	2.4025	2.4025	0.645161	0.645161
	0.25	4	0	0.416233	1	1.55	0.645161	0.416233	0.645161	2.4025
	0.25	4	0	0.645161	0.416233	1.55	0.416233	1	0.645161	1
	0.25	4	0	1.55	0.645161	1.55	2.4025	1	0.645161	1
	0.25	4	1	0.645161	0.416233	1.55	1.55	1	0.416233	1.55
	0.25	4	0	0.416233	1	1.55	0.416233	1	1	2.4025
	0.25	4	1	0.645161	1.55	0.416233	1.55	0.645161	1	0.645161
	0.25	4	0	0.416233	1	0.645161	0.645161	1.55	0.416233	0.416233
	0.25	4	0	1	0.416233	0.416233	1.55	1.55	1	0.416233
	0.25	4	0	2.4025	0.645161	0.645161	1.55	0.416233	0.645161	1
	0.25	4	1	0.645161	1.55	1	0.645161	0.645161	2.4025	0.416233
	0.25	4	0	0.416233	1.55	1.55	1	0.416233	0.416233	2.4025
	0.25	4	1	0.645161	0.416233	0.416233	0.416233	2.4025	2.4025	1
	0.25	4	1	2.4025	1	1.55	2.4025	2.4025	0.416233	0.645161
	0.25	4	0	1	0.416233	2.4025	1	2.4025	1.55	0.416233
	0.25	4	1	1.55	1	0.645161	0.645161	0.416233	2.4025	2.4025
	0.25	4	1	0.645161	0.645161	0.416233	0.645161	0.645161	1	2.4025
	0.25	4	1	1.55	0.645161	0.645161	0.416233	1	2.4025	0.416233
	0.25	4	1	0.416233	1	2.4025	0.416233	0.416233	1.55	1.55
	0.25	4	1	1	1.55	0.416233	0.645161	2.4025	2.4025	1.55
	0.25	4	0	0.416233	0.645161	2.4025	0.416233	1.55	1	0.416233
	0.25	4	1	2.4025	1	0.645161	1	0.416233	1.55	1.55
	0.25	4	0	1	0.645161	1	0.645161	0.416233	1	1.55
	0.25	4	0	1.55	1	0.416233	0.645161	1	2.4025	2.4025
	0.25	4	1	0.416233	0.645161	1.55	0.416233	1.55	2.4025	0.416233
	0.25	4	1	2.4025	0.645161	0.416233	1.55	1	0.645161	0.416233
	0.25	4	1	0.416233	1	0.416233	0.645161	2.4025	0.645161	0.416233
	0.25	4	1	1.55	0.645161	1.55	1	2.4025	0.645161	1.55
	0.25	4	0	0.645161	0.645161	0.645161	2.4025	0.645161	2.4025	1.55
	0.25	4	1	1	2.4025	2.4025	2.4025	2.4025	1	1.55
	0.25	4	1	1.55	2.4025	1	0.645161	0.645161	1	0.645161
	0.25	4	1	2.4025	0.416233	0.645161	1.55	2.4025	2.4025	0.416233
	0.25	4	1	0.416233	0.416233	0.416233	1.55	0.416233	0.416233	2.4025
	0.25	4	1	1.55	0.416233	0.645161	0.645161	2.4025	0.416233	1.55
	0.25	4	0	2.4025	0.416233	2.4025	0.645161	0.645161	0.416233	0.645161
	0.25	4	1	1.55	2.4025	2.4025	2.4025	1	2.4025	1
	0.25	4	1	1	2.4025	2.4025	1.55	0.645161	0.645161	1
	0.25	4	1	1.55	2.4025	1.55	1	1	1.55	0.416233
	0.25	4	1	1.55	0.416233	1	0.645161	0.645161	2.4025	0.645161
	0.25	4	1	0.645161	1.55	1	2.4025	0.645161	0.416233	2.4025
	0.25	4	1	0.645161	0.645161	0.645161	1	1	1	2.4025
	0.25	4	1	1.55	1	1	1	1.55	1.55	2.4025
	0.25	4	1	0.416233	1	0.416233	0.416233	1.55	1	1.55
	0.25	4	0	1	0.645161	0.645161	0.645161	0.645161	1	0.416233
	0.25	4	1	2.4025	0.645161	1.55	2.4025	1	1	0.645161
	0.25	4	1	1	1	0.645161	1	1	0.416233	1
	0.25	4	1	1	1	2.4025	0.416233	2.4025	1	1.55
	0.25	4	1	2.4025	0.416233	0.416233	0.416233	0.416233	0.645161	0.645161
	0.25	4	0	0.645161	0.416233	2.4025	0.645161	2.4025	1	1
	0.25	4	0	0.645161	2.4025	1	0.645161	1.55	0.416233	1.55
	0.25	4	1	1	0.416233	2.4025	0.416233	2.4025	1	1.55
	0.25	4	1	2.4025	2.4025	0.645161	2.4025	2.4025	0.416233	0.416233
	0.25	4	1	0.416233	2.4025	0.645161	2.4025	1.55	0.416233	0.645161
	0.25	4	1	2.4025	1.55	1.55	0.645161	2.4025	0.416233	0.416233
	0.25	4	1	1	2.4025	2.4025	0.645161	0.416233	1	1.55
	0.25	4	0	1.55	0.416233	1.55	2.4025	1	2.4025	1.55
	0.25	4	1	0.645161	0.645161	1	1.55	1.55	1	1
	0.25	4	0	1	0.416233	1	0.645161	1.55	0.416233	2.4025
	0.25	4	0	1	0.416233	1.55	0.645161	0.645161	1	0.416233
	0.25	4	0	0.645161	0.416233	0.645161	1.55	1	0.416233	1
	0.25	4	1	0.645161	0.645161	0.645161	2.4025	1.55	1.55	0.416233
	0.25	4	1	0.416233	1	2.4025	1	0.416233	1	0.416233
	0.25	4	0	0.645161	1	0.645161	0.416233	0.645161	1	1.55
	0.25	4	1	0.645161	1.55	2.4025	0.416233	0.645161	0.416233	0.416233
	0.25	4	1	2.4025	1	0.416233	0.645161	2.4025	0.416233	1.55
	0.25	4	1	0.645161	1	0.645161	1	1.55	1	1.55
	0.25	4	1	0.416233	1.55	0.416233	2.4025	0.416233	2.4025	1.55
	0.25	4	0	1	2.4025	1	0.416233	1	0.416233	1
	0.25	4	1	0.416233	1	2.4025	2.4025	1	2.4025	0.645161
	0.25	4	1	1	1.55	1.55	0.416233	0.416233	2.4025	0.416233
	0.25	4	1	0.645161	1.55	1	1	0.416233	1.55	0.645161
	0.25	4	0	1.55	0.416233	0.645161	1	1.55	0.416233	0.416233
	0.25	4	1	0.416233	1.55	1	0.416233	2.4025	0.416233	0.645161
	0.25	4	1	0.645161	1	1.55	0.645161	2.4025	0.416233	0.645161
	0.25	4	0	1	0.416233	0.416233	1.55	1.55	1	0.416233
	0.25	4	1	0.416233	1	0.416233	0.416233	2.4025	1	1
	0.25	4	1	0.645161	1	0.645161	2.4025	1.55	1.55	2.4025
	0.25	4	0	2.4025	1	1.55	1	2.4025	2.4025	0.645161
	0.25	4	1	0.416233	1.55	0.416233	1	0.416233	1	0.645161
	0.25	4	1	0.645161	1	2.4025	0.645161	0.416233	0.645161	1
	0.25	4	1	1.55	1.55	2.4025	0.416233	1	0.645161	2.4025
	0.25	4	1	0.416233	1.55	0.416233	0.645161	0.416233	2.4025	2.4025
	0.25	4	1	2.4025	2.4025	1.55	0.645161	0.416233	1.55	0.416233
	0.25	4	1	2.4025	1.55	2.4025	1.55	0.645161	0.645161	2.4025
	0.25	4	1	0.645161	0.645161	2.4025	1.55	0.416233	1.55	0.416233
	0.25	4	1	1	0.645161	1.55	0.645161	1.55	1.55	0.416233
	0.25	4	0	1	1	1.55	1	0.645161	1	0.645161
	0.25	4	1	0.416233	1.55	2.4025	1.55	2.4025	1.55	1.55
	0.25	4	0	0.416233	0.645161	2.4025	0.416233	0.416233	1.55	0.645161
	0.25	4	1	1.55	2.4025	1	1.55	0.416233	1.55	1.55
	0.25	4	1	0.416233	0.645161	1	2.4025	0.416233	2.4025	0.416233
	0.25	4	1	0.416233	1	0.645161	0.416233	1	1	2.4025
	0.25	4	0	2.4025	1	1.55	1	0.416233	2.4025	1
	0.25	4	1	0.416233	1	1	1.55	0.645161	1.55	1
	0.25	4	1	1.55	1	2.4025	1.55	0.416233	2.4025	0.416233
	0.25	4	1	1	0.416233	1	1.55	0.645161	0.645161	1.55
	0.25	4	1	0.416233	0.645161	0.416233	1	1	2.4025	1
	0.25	4	1	0.645161	1.55	1.55	0.416233	0.645161	0.645161	0.645161
	0.25	4	0	0.416233	0.645161	0.645161	0.645161	0.416233	1.55	1.55
	0.25	4	1	1	0.645161	1	2.4025	2.4025	0.645161	1.55
	0.25	4	1	1	2.4025	1	1.55	1.55	1.55	1
	0.25	4	1	0.645161	2.4025	1.55	0.416233	2.4025	1	1.55
	0.25	4	1	1	1	1.55	1.55	2.4025	2.4025	0.645161
	0.25	4	1	2.4025	2.4025	1	0.416233	1.55	2.4025	0.645161
	0.25	4	1	1	0.416233	1.55	1.55	0.416233	1.55	1
	0.25	4	0	0.645161	0.645161	1	1	2.4025	0.645161	0.645161
	0.25	4	0	0.416233	1	0.645161	1	2.4025	0.416233	2.4025
	0.25	4	0	2.4025	2.4025	2.4025	1	1	1.55	0.416233
	0.25	4	1	2.4025	1	0.645161	2.4025	0.416233	0.645161	0.645161
	0.25	4	1	2.4025	2.4025	1.55	1.55	0.416233	0.645161	1.55
	0.25	4	0	0.645161	1	1	0.416233	0.416233	0.645161	2.4025
	0.25	4	1	2.4025	1.55	0.416233	1.55	0.416233	0.645161	2.4025
	0.25	4	1	1.55	2.4025	1.55	1	2.4025	1	1
	0.25	4	1	1	1.55	2.4025	0.645161	1.55	2.4025	2.4025
[truncated: 8,002 more rows]

## Sheet: Exp5
		L6
			1) 0.25	2) 0.5	3) 1	4) 2	5) 4	6) 8
			12.61	7.95	11.91	15	15	60
			9.45	8.92	9.45	3.15	28.32
			7.08	6.31	2.98	7.5	9.45
			6.68	6.31	7.5	7.95	21.21
			8.66441	7.2895	7.08199	7.28547	17.082	60	.
		L7
			1) 0.25	2) 0.5	3) 1	4) 2	5) 4	6) 8
			13.36	25.23	23.81	60	25.23	60
			15.89	25.23	5.01	50.45	60
			28.32	47.62	30	3.75	60
			16.84	25.23	4.73	37.8
			17.8378	29.5723	11.4063	25.5937	44.9511	60	.
		L8
			1) 0.25	2) 0.5	3) 1	4) 2	5) 4	6) 8
			4.73	4.46	2.5	2.98	3.75	60
			6.3	4.45	2.65	2.81	4.68
			6.62	3.75	2.5	2.814	3.54
			6.25	4.72	3.15	1.87	4.42
			5.92564	4.32929	2.68757	2.57645	4.07076	60	.
		L9
			1) 0.25	2) 0.5	3) 1	4) 2	5) 4	6) 8
			5	5.95	7.07	3.97	5.95	60
			4.2	5	3.34	3.75	3.54	60
			5	4.2	1.87	3.75	3.75	60
			7.07	4.2	2.1	1.87	4.2	60
			5.21978	4.78626	3.10318	3.19649	4.26776	60	.
		L10
			1) 0.25	2) 0.5	3) 1	4) 2	5) 4	6) 8
			14.16	5.61	3.97	3.54	14.02	60
			6.3	5.95	3.75	3.93	14.14	60
			10.61	4.2	3.36	3.57	7.5	60
			7.49	6.67	4.5	2.83	14.14	60
			9.17593	5.52985	3.87341	3.4432	12.0414	60	.
		L11
			1) 0.25	2) 0.5	3) 1	4) 2	5) 4	6) 8
			5.95	5.01	6.31	4.46	5.95	60
			5.57	4.17	3.72	2.5	8.42	60
			3.94	4.68	3.13	1.97	5.57	60
			3.75	4.72	2.5	2.36	6.31
			4.70408	4.6349	3.68141	2.68326	6.47781	60	.
		L12
			1) 0.25	2) 0.5	3) 1	4) 2	5) 4	6) 8
			5.006	3.15	1.669	2.102	4.204	60
			4.46	3.536	2.973	3.337	6.3	60
			5.953	4.454	2.5	3.969	2.973	60
			12.61	4.454	1.873	3.15	5.297	60
			6.39837	3.8555	2.19549	3.06017	4.51915	60	.
		L13
			1) 0.25	2) 0.5	3) 1	4) 2	5) 4	6) 8
			5.297	5	3.746	2.649	5.612	60
			6.3	5.612	2.378	2.523	8.409	60
			5.612	4.454	2.649	2.649	5.339	60
			5	3.969	3.15	2.245	4.454	60
			5.53178	4.71932	2.93625	2.51087	5.78786	60	.
		L14
			1) 0.25	2) 0.5	3) 1	4) 2	5) 4	6) 8
			7.937	6.307	7.492	2.5	7.937	60
			4.204	6.3	2.227	2.227	15	60
			8.409	7.56	2.5	2.973	5.612	60
			7.5	6.307	3.337	5.946	4.204	60
			6.773	6.59746	3.43482	3.14971	7.28001	60	.
		L15
			1) 0.25	2) 0.5	3) 1	4) 2	5) 4	6) 8
			3.746	3.969	2.806	2.102	9.439	60
			4.719	6.674	3.536	3.746	23.78	60
			6.674	5.612	4.204	2.36	6.674	60
			8.409	6.674	2.973	2.36	1.984	60
			5.61225	5.61232	3.33706	2.57339	7.38357	60	.
		L16
			1) 0.25	2) 0.5	3) 1	4) 2	5) 4	6) 8
			5	3.364	2.649	1.984	5.612	60
			6.674	4.162	3.536	3.337	4.46	60
			6.674	4.238	3.746	6.3	10.01	60
			37.8	10.59	6.357	37.75	17.32	60
			9.57874	5.00673	3.86459	6.29925	8.11631	60	.
		L17
			1) 0.25	2) 0.5	3) 1	4) 2	5) 4	6) 8
			4.454	2.36	3.969	2.649	4.204	60
			11.89	6.3	2.973	1.768	3.969	60
			8.409	5	2.102	2.36	3.15	60
			10.59	4.719	2.806	2.5	7.492	60
			8.28692	4.32781	2.88835	2.29274	4.45464	60	.
		L18
			1) 0.25	2) 0.5	3) 1	4) 2	5) 4	6) 8
			5.946	3.746	3.536	2.102	2.806	60
			7.071	3.969	3.15	2.227	3.337	60
			5.953	5.612	6.674	2.973	2.227	60
			6.3	5.657	2.806	1.984	4.454	60
			6.30152	4.6611	3.80036	2.2923	3.10441	60	.
		L19
			1) 0.25	2) 0.5	3) 1	4) 2	5) 4	6) 8
			3.746	4.719	2.102	3.536	3.15	60
			4.204	2.973	3.536	2.227	2.649	60
			6.674	4.762	2.649	2.36	5.612	60
			12.6	4.719	2.806	3	4.204	60
			6.03249	4.21377	2.72633	2.73254	3.74579	60	.
		L20
			1) 0.25	2) 0.5	3) 1	4) 2	5) 4	6) 8
			3.969	3.337	2.973	3.15	9.439	60
			4.719	3.969	2.649	2.002	5.946	60
			3.746	3.5	2.5	2.36	6.3	60
			6.3	3.304	2.227	2.973	8.919	60
			4.58522	3.51792	2.57326	2.57911	7.4938	60	.

## Sheet: key
Listener demographics
			prior listening
	listener #	age (yrs)	experience (hrs)
	1	47	2000
	2	41	650
	3	28	400
	4	63	500
	5	25	30
	6	20	<= 2
	7	22	5
	8	26	3
	9	20	4
	10	20	<= 2
	11	20	5
	12	20	<= 2
	13	20	<= 2
	14	25	<= 2
	15	24	<= 2
	16	19	0
	17	20	0
	18	20	0
	19	19	0
	20	19	0
